# Supplementary material for: Synthesis of fused quinazolinones via visible light induced cyclization of 2-aminobenzaldehydes with tetrahydroisoquinolines
Source: Royal Society of Chemistry journal article supplement (doi:10.1039/d3ob00198a), 2023-01-01
Supplement: d3ob00198a1.pdf [file d3ob00198a1.pdf]

## Supporting Information

### Synthesis of fused quinazolinones via visible light induced cyclization of 2-aminobenzaldehydes with tetrahydroisoquinolines

#### Table of Contents

##### Contents

|                                                    |    |
|----------------------------------------------------|----|
| 1. General information.....                        | 2  |
| 2. General procedure.....                          | 2  |
| 3. Analytical data for the compounds prepared..... | 4  |
| 4. Reference .....                                 | 14 |
| 5. Spectral data for the compounds prepared.....   | 16 |

## 1. General information

All reactions were carried out under an atmosphere of air unless otherwise noted. Column chromatography was performed using silica gel (200-300 mesh).  $^1\text{H}$  NMR and  $^{13}\text{C}$  NMR spectra were recorded on Bruker-AV (500 and 126 MHz, respectively) instrument using  $\text{CDCl}_3$  as solvent and TMS as an internal standard. The structures of known compounds were further corroborated by comparing their  $^1\text{H}$  NMR,  $^{13}\text{C}$  NMR data and with those of literature. Most reagents were obtained from commercial suppliers and used without further purification.

## 2. General procedure

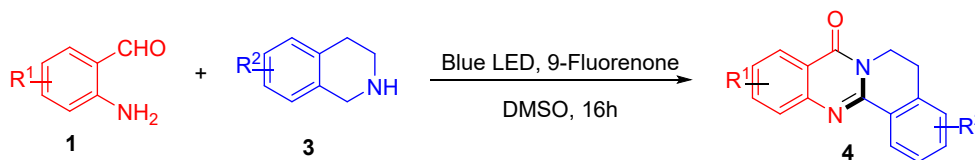

Add 2-aminobenzaldehyde (0.2 mmol, 1.0 equiv.), tetrahydroisoquinoline (0.6 mmol, 3.0 equiv.), 9-fluorenone (4 mol%, 0.04 equiv.) and 2 mL DMSO to 10 ml glass test tube. The reaction mixture was then stirred at room temperature and the test tube was illuminated with an 18W blue LED ( $\lambda=460\sim 462$  nm) for 16 hours. At the end of the reaction, the reactants were extracted by ethyl acetate for 3 times, the organic phase was collected, and the solvent was vacuum concentrated and purified by

silica gel fast chromatography to obtain the required product.

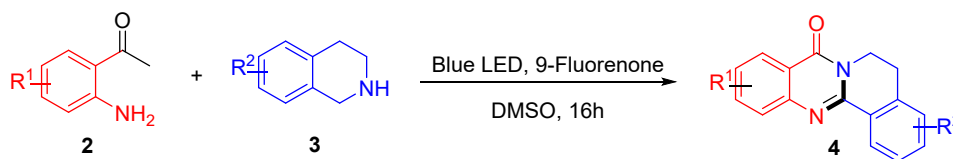

2-aminoacetophenone (0.2 mmol, 1.0 eq), tetrahydroisoquinoline (0.6 mmol, 3.0 equiv.), 9-fluorenone (4 mol%, 0.04 equiv.) and 2 mL DMSO were added to 10 ml glass test tubes. The reaction mixture was then stirred at 40°C and the tube was illuminated with an 18w blue LED for 16 hours. At the end of the reaction, the reactants were extracted by ethyl acetate for 3 times, the organic phase was collected, the solvent vacuum concentrated, and the silica gel was purified by rapid chromatography to obtain the required products

### 3. Analytical data for the compounds prepared

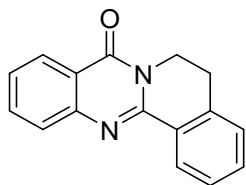

**5,6-dihydro-8H-isoquinolino[1,2-b]quinazolin-8-one (4a):** Yield 90%; white solid, m.p. 155.9~157.4 °C;  $^1\text{H}$  NMR (500 MHz,  $\text{CDCl}_3$ )  $\delta$  8.48 (d,  $J = 7.6$  Hz, 1H), 8.31 (d,  $J = 7.8$  Hz, 1H), 7.80 – 7.72 (m, 2H), 7.45 (tt,  $J = 13.6, 6.8$  Hz, 3H), 7.28 (d,  $J = 7.3$  Hz, 1H), 4.43 – 4.39 (m, 2H), 3.10 (t,  $J = 6.5$  Hz, 2H);  $^{13}\text{C}$  NMR (126 MHz,  $\text{CDCl}_3$ )  $\delta$  161.7, 149.5, 147.7, 137.1, 134.3, 131.8, 129.5, 128.1, 127.7, 127.6, 127.6, 126.9, 126.6, 120.7, 39.6, 27.5. This compound is known.<sup>[1]</sup>

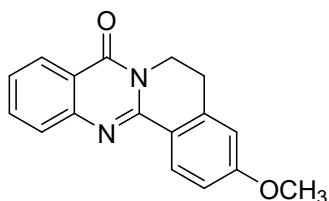

**3-methoxy-5,6-dihydro-8H-isoquinolino[1,2-b]quinazolin-8-one (4b):** Yield 90%; white solid, m.p. 188.9~190.2 °C;  $^1\text{H}$  NMR (500 MHz,  $\text{CDCl}_3$ )  $\delta$  8.41 (d,  $J = 8.8$  Hz, 1H), 8.28 (d,  $J = 7.9$  Hz, 1H), 7.72 (d,  $J = 3.7$  Hz, 2H), 7.42 (dt,  $J = 8.1, 4.1$  Hz, 1H), 6.94 (dd,  $J = 8.8, 2.5$  Hz, 1H), 6.75 (d,  $J = 2.2$  Hz, 1H), 4.42 – 4.38 (m, 2H), 3.87 (s, 3H), 3.06 (t,  $J = 6.5$  Hz, 2H);  $^{13}\text{C}$  NMR (126 MHz,  $\text{CDCl}_3$ )  $\delta$  162.4, 161.8, 149.4, 148.0, 139.0, 134.2, 130.0, 127.3, 126.8, 126.0, 122.1, 120.4, 113.7, 112.1, 55.5, 39.5, 27.7. This compound is known.<sup>[2]</sup>

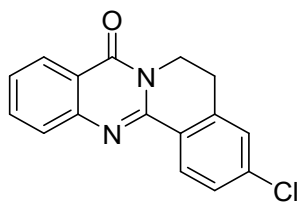

**3-chloro-5,6-dihydro-8H-isoquinolino[1,2-b] quinazolin-8-one(4c):**

Yield 51%; white solid, m.p. 194.8~196.2 °C; <sup>1</sup>H NMR (500 MHz, CDCl<sub>3</sub>) δ 8.41 (d, *J* = 8.4 Hz, 1H), 8.29 (d, *J* = 7.9 Hz, 1H), 7.75 (d, *J* = 5.3 Hz, 2H), 7.46 (td, *J* = 6.8, 5.8, 2.2 Hz, 1H), 7.42 – 7.36 (m, 1H), 7.28 (s, 1H), 4.40 (t, *J* = 6.4 Hz, 2H), 3.08 (t, *J* = 6.4 Hz, 2H); <sup>13</sup>C NMR (126 MHz, CDCl<sub>3</sub>) δ 161.5, 148.5, 147.6, 138.6, 137.8, 134.4, 129.6, 128.0, 128.0, 127.6, 127.5, 126.9, 126.7, 120.7, 39.4, 27.3. This compound is known.<sup>[3]</sup>

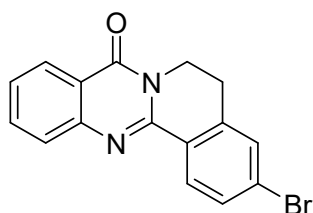

**3-bromo-5,6-dihydro-8H-isoquinolino[1,2-b] quinazolin-8-one(4d):**

Yield 80%; white solid, m.p. 151.3~152.1 °C; <sup>1</sup>H NMR (400 MHz, CDCl<sub>3</sub>) δ 8.49 (d, *J* = 7.9 Hz, 1H), 8.32 (d, *J* = 7.9 Hz, 1H), 7.76 (d, *J* = 3.6 Hz, 2H), 7.73 (dd, *J* = 8.0, 1.1 Hz, 1H), 7.48 (dp, *J* = 8.7, 4.6 Hz, 1H), 7.31 (t, *J* = 7.9 Hz, 1H), 4.44 – 4.38 (m, 2H), 3.22 (t, *J* = 6.5 Hz, 2H). <sup>13</sup>C NMR (101 MHz, CDCl<sub>3</sub>) δ 161.5, 148.5, 147.7, 136.8, 135.5, 134.4, 131.7, 128.7, 127.7, 127.4, 126.9, 126.9, 123.3, 120.8, 39.0, 27.4. This compound is known. <sup>[4]</sup>

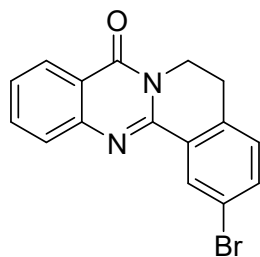

**2-bromo-5,6-dihydro-8H-isoquinolino[1,2-b] quinazolin-8-one(4e):**

Yield 89%; white solid, m.p. 208.2~210.1 °C; <sup>1</sup>H NMR (400 MHz, CDCl<sub>3</sub>) δ 8.35 (d, *J* = 8.5 Hz, 1H), 8.30 (dt, *J* = 8.0, 1.1 Hz, 1H), 7.78 – 7.72 (m, 2H), 7.56 (dd, *J* = 8.5, 2.0 Hz, 1H), 7.49 – 7.43 (m, 2H), 4.43 – 4.37 (m, 2H), 3.08 (t, *J* = 6.5 Hz, 2H); <sup>13</sup>C NMR (101 MHz, CDCl<sub>3</sub>) δ 161.5, 148.6, 147.6, 138.8, 134.4, 131.0, 130.5, 129.7, 128.6, 127.6, 126.9, 126.8, 126.4, 120.8, 39.4, 27.2. This compound is known. [4]

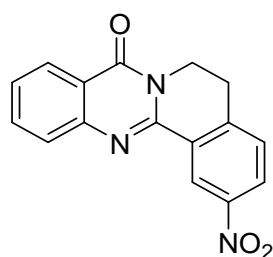

**2-nitro-5,6-dihydro-8H-isoquinolino[1,2-b] quinazolin-8-one(4f):**

Yield 27%; yellow solid, m.p. 243.1~244.7 °C; <sup>1</sup>H NMR (400 MHz, CDCl<sub>3</sub>) δ 9.37 – 9.27 (m, 1H), 8.30 (d, *J* = 8.0 Hz, 2H), 7.80 (q, *J* = 8.0, 6.5 Hz, 2H), 7.56 – 7.44 (m, 2H), 4.46 (t, *J* = 6.3 Hz, 2H), 3.23 (t, *J* = 6.2 Hz, 2H); <sup>13</sup>C NMR (101 MHz, CDCl<sub>3</sub>) δ 161.3, 147.8, 147.3, 147.2, 143.4, 134.6, 131.1, 128.9, 127.9, 127.4, 127.0, 125.8, 123.4, 120.9, 39.0, 27.6. This compound is known. [5]

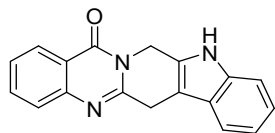

**6,14-dihydroindolo [3',2':4,5] pyrido[2,1-b] quinazolin-8(5H)-one(4g):**

Yield 65%; white solid, m.p. 259.3~261.2 °C; <sup>1</sup>H NMR (500 MHz, CDCl<sub>3</sub>) δ 10.03 (s, 1H), 8.33 (d, *J* = 7.8 Hz, 1H), 7.70 – 7.59 (m, 3H), 7.42 (t, *J* = 7.2 Hz, 1H), 7.26 (d, *J* = 3.6 Hz, 2H), 7.15 (dt, *J* = 7.5, 3.6 Hz, 1H), 4.59 (t, *J* = 6.8 Hz, 2H), 3.23 (t, *J* = 6.8 Hz, 2H); <sup>13</sup>C NMR (126 MHz, CDCl<sub>3</sub>) δ 161.6, 147.3, 145.2, 138.4, 134.5, 127.3, 127.0, 126.4, 126.3, 125.6, 125.6, 121.1, 120.6, 120.1, 118.6, 112.2, 77.1, 41.2, 19.7.

This compound is known. [5]

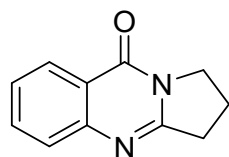

**2,3-dihydropyrrolo[2,1-b] quinazolin-9(1H)-one(4h):** Yield 48%;

Viscous liquid; <sup>1</sup>H NMR (500 MHz, CDCl<sub>3</sub>) δ 8.28 (d, *J* = 7.9 Hz, 1H), 7.76 – 7.70 (m, 1H), 7.64 (d, *J* = 8.1 Hz, 1H), 7.45 (t, *J* = 7.5 Hz, 1H), 4.25 – 4.16 (m, 2H), 3.18 (t, *J* = 8.0 Hz, 2H), 2.29 (p, *J* = 7.8 Hz, 2H); <sup>13</sup>C NMR (126 MHz, DMSO-*d*<sub>6</sub>) δ 156.3, 154.7, 144.4, 129.4, 122.0, 121.6, 121.5, 115.7, 41.8, 27.8, 14.8. This compound is known. [6]

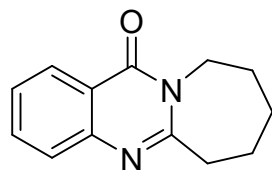

**7,8,9,10-tetrahydroazepino[2,1-b] quinazolin-12(6H)-one(4i):** Yield

42%; Viscous liquid; <sup>1</sup>H NMR (500 MHz, DMSO-*d*<sub>6</sub>) δ 8.10 (d, *J* = 7.7

Hz, 1H), 7.78 (t,  $J = 7.1$  Hz, 1H), 7.58 (d,  $J = 8.1$  Hz, 1H), 7.48 (t,  $J = 7.5$  Hz, 1H), 4.39 – 4.29 (m, 2H), 3.08 – 3.02 (m, 2H), 1.80 – 1.73 (m, 4H), 1.72 – 1.67 (m, 2H);  $^{13}\text{C}$  NMR (126 MHz,  $\text{DMSO-}d_6$ )  $\delta$  161.4, 160.6, 147.7, 134.7, 127.1, 126.9, 126.7, 120.2, 42.5, 37.1, 29.3, 28.0, 25.4. This compound is known. [6]

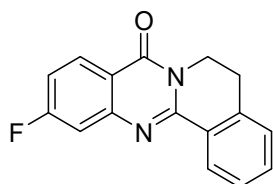

**11-fluoro-5,6-dihydro-8H-isoquinolino[1,2-b] quinazolin-8-one(4j):**

Yield 45%; white solid, m.p. 169.6~171.6 °C;  $^1\text{H}$  NMR (500 MHz,  $\text{CDCl}_3$ )  $\delta$  8.46 (d,  $J = 7.6$  Hz, 1H), 8.38 – 8.24 (m, 1H), 7.46 (ddd,  $J = 31.0, 15.1, 8.4$  Hz, 3H), 7.30 (d,  $J = 7.3$  Hz, 1H), 7.17 (t,  $J = 8.4$  Hz, 1H), 4.40 (t,  $J = 6.3$  Hz, 2H), 3.11 (t,  $J = 6.2$  Hz, 2H);  $^{13}\text{C}$  NMR (126 MHz,  $\text{CDCl}_3$ )  $\delta$  167.5, 165.5, 161.1, 150.6, 150.0, 149.9, 137.2, 132.1, 129.7, 129.6, 129.2, 128.2, 127.7, 127.6, 117.5, 115.5, 115.3, 112.8, 112.6, 39.6, 27.4. This compound is known. [7]

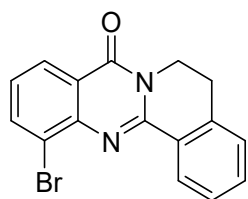

**12-bromo-5,6-dihydro-8H-isoquinolino[1,2-b] quinazolin-8-one(4k):**

Yield 39%; white solid, m.p. 231.2~233.5 °C;  $^1\text{H}$  NMR (500 MHz,  $\text{CDCl}_3$ )  $\delta$  8.60 (d,  $J = 5.9$  Hz, 1H), 8.26 (d,  $J = 6.9$  Hz, 1H), 8.02 (d,  $J = 6.6$  Hz, 1H), 7.56 – 7.40 (m, 2H), 7.29 (dd,  $J = 15.7, 7.1$  Hz, 2H), 4.50 –



4.28 (m, 2H), 3.21 – 3.00 (m, 2H);  $^{13}\text{C}$  NMR (126 MHz,  $\text{CDCl}_3$ )  $\delta$  161.3, 150.0, 145.5, 137.9, 137.0, 132.2, 129.3, 128.6, 127.9, 127.5, 126.9, 126.5, 122.9, 122.2, 39.8, 27.3. This compound is known. <sup>[2]</sup>

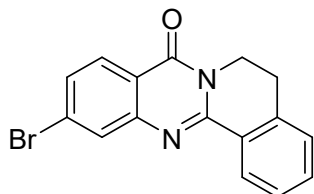

**11-bromo-5,6-dihydro-8H-isoquinolino[1,2-b] quinazolin-8-one(4l):**

Yield 68%; white solid, m.p. 174.7~176.5 °C;  $^1\text{H}$  NMR (500 MHz,  $\text{CDCl}_3$ )  $\delta$  8.37 (d,  $J = 7.4$  Hz, 1H), 8.06 (d,  $J = 8.4$  Hz, 1H), 7.87 (s, 1H), 7.51 – 7.32 (m, 3H), 7.24 – 7.16 (m, 1H), 4.41 – 4.21 (m, 2H), 3.09 – 2.94 (m, 2H);  $^{13}\text{C}$  NMR (126 MHz,  $\text{CDCl}_3$ )  $\delta$  161.3, 150.5, 148.8, 137.1, 132.1, 130.3, 129.8, 129.2, 128.9, 128.4, 128.2, 127.7, 127.6, 119.5, 39.7, 27.3. This compound is known. <sup>[7]</sup>

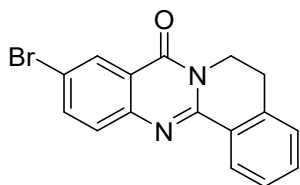

**10-bromo-5,6-dihydro-8H-isoquinolino[1,2-b] quinazolin-8-one(4m):**

Yield 70%; white solid, m.p. 190.6~191.2 °C;  $^1\text{H}$  NMR (500 MHz,  $\text{CDCl}_3$ )  $\delta$  8.47 – 8.37 (m, 2H), 7.79 (dd,  $J = 8.7, 2.3$  Hz, 1H), 7.61 (d,  $J = 8.7$  Hz, 1H), 7.45 (dt,  $J = 28.5, 7.4$  Hz, 2H), 7.27 (d,  $J = 7.2$  Hz, 1H), 4.42 – 4.35 (m, 2H), 3.09 (t,  $J = 6.4$  Hz, 2H);  $^{13}\text{C}$  NMR (126 MHz,  $\text{CDCl}_3$ )  $\delta$  160.6, 149.8, 146.6, 137.4, 137.1, 132.0, 129.4, 129.2, 128.1, 127.7, 127.6, 122.0, 120.0, 39.8, 27.3. This compound is known. <sup>[2]</sup>

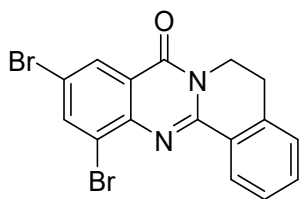

**10,12-dibromo-5,6-dihydro-8H-isoquinolino[1,2-b]quinazolin-8-**

**one(4n):** Yield 30%; white solid, m.p. 200.6~202.2 °C; <sup>1</sup>H NMR (400 MHz, CDCl<sub>3</sub>) δ 8.48 – 8.38 (m, 2H), 7.80 (dd, *J* = 8.7, 2.2 Hz, 1H), 7.62 (d, *J* = 8.7 Hz, 1H), 7.46 (dt, *J* = 23.4, 7.3 Hz, 2H), 4.39 (t, *J* = 6.5 Hz, 2H), 3.10 (t, *J* = 6.4 Hz, 2H); <sup>13</sup>C NMR (101 MHz, CDCl<sub>3</sub>) δ 160.6, 149.8, 146.7, 137.4, 137.0, 132.0, 129.4, 129.3, 128.1, 127.7, 127.6, 122.1, 119.9, 39.8, 27.4. ESI-HRMS calcd for [C<sub>16</sub>H<sub>10</sub>Br<sub>2</sub>N<sub>2</sub>O + H] 404.9233, found 404.92298.

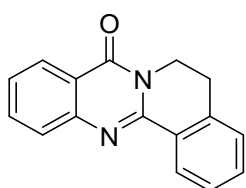

**5,6-dihydro-8H-isoquinolino[1,2-b] quinazolin-8-one (4a-from 2-aminophenone):** Yield 50%; white solid, m.p. 153.9~156.4 °C; <sup>1</sup>H NMR (400 MHz, CDCl<sub>3</sub>) δ 8.50 (dd, *J* = 7.7, 1.2 Hz, 1H), 8.32 (d, *J* = 8.3 Hz, 1H), 7.76 (dd, *J* = 6.4, 1.4 Hz, 2H), 7.51 – 7.42 (m, 3H), 7.29 (d, *J* = 7.2 Hz, 1H), 4.46 – 4.39 (m, 2H), 3.11 (t, *J* = 6.5 Hz, 2H); <sup>13</sup>C NMR (101 MHz, CDCl<sub>3</sub>) δ 161.8, 149.4, 147.8, 137.1, 134.3, 131.7, 129.6, 128.1, 127.7, 127.6, 127.5, 126.9, 126.6, 120.8, 39.6, 27.5. This compound is known. [1]

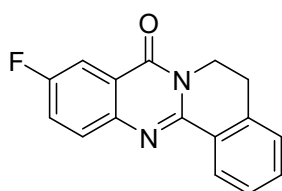

**10-fluoro-5,6-dihydro-8H-isoquinolino[1,2-b]quinazolin-8-one(4o):**

Yield 51%; white solid, m.p. 204.8~205.1 °C; <sup>1</sup>H NMR (500 MHz, CDCl<sub>3</sub>) δ 8.44 (d, *J* = 7.0 Hz, 1H), 7.92 (d, *J* = 5.5 Hz, 1H), 7.82 – 7.72 (m, 1H), 7.45 (dd, *J* = 17.2, 6.3 Hz, 3H), 7.28 (d, *J* = 6.6 Hz, 1H), 4.44 – 4.37 (m, 2H), 3.15 – 3.06 (m, 2H); <sup>13</sup>C NMR (126 MHz, CDCl<sub>3</sub>) δ 161.1, 160.8 (*J*<sub>C-F</sub>=248.2 Hz), 148.8, 144.5, 136.9, 131.8, 130.8 (*J*<sub>C-F</sub>=7.6 Hz) 129.3, 127.9, 127.7, 127.6, 122.9 (*J*<sub>C-F</sub>=25.2Hz), 121.9 (*J*<sub>C-F</sub>=10.1Hz), 111.7 (*J*<sub>C-F</sub>=23.9Hz), 39.8, 27.4. This compound is known. [2]

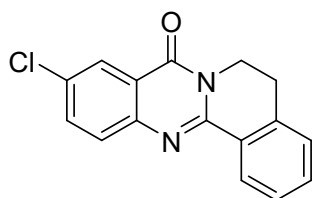

**10-chloro-5,6-dihydro-8H-isoquinolino[1,2-b] quinazolin-8-one(4p):**

Yield 70%; white solid, m.p. 178.6~180.2°C; <sup>1</sup>H NMR (400 MHz, CDCl<sub>3</sub>) δ 8.36 (d, *J* = 7.7 Hz, 1H), 8.21 – 8.12 (m, 1H), 7.64 – 7.54 (m, 2H), 7.37 (dt, *J* = 22.0, 7.3 Hz, 2H), 7.20 (d, *J* = 8.3 Hz, 1H), 4.31 (t, *J* = 6.5 Hz, 2H), 3.02 (t, *J* = 6.4 Hz, 2H); <sup>13</sup>C NMR (101 MHz, CDCl<sub>3</sub>) δ 160.6, 149.8, 146.7, 137.4, 137.0, 132.0, 129.4, 129.3, 128.1, 127.7, 127.6, 122.1, 120.0, 39.8, 27.4. This compound is known. [2]

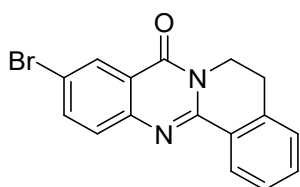

**10-bromo-5,6-dihydro-8H-isoquinolino[1,2-b]quinazolin-8-one(4m-**

**from 2-aminophenone):** Yield 55%; white solid, m.p. 194.7~196.4 °C; <sup>1</sup>H

NMR (400 MHz, CDCl<sub>3</sub>)  $\delta$  8.46 – 8.39 (m, 2H), 7.80 (dd,  $J = 8.7, 2.3$  Hz, 1H), 7.60 (s, 1H), 7.51 – 7.39 (m, 2H), 7.27 (d,  $J = 8.1$  Hz, 1H), 4.42 – 4.36 (m, 2H), 3.09 (t,  $J = 6.5$  Hz, 2H); <sup>13</sup>C NMR (101 MHz, CDCl<sub>3</sub>)  $\delta$  160.6, 149.8, 146.7, 137.4, 137.0, 132.0, 129.4, 129.3, 128.1, 127.7, 127.6, 122.1, 120.0, 39.8, 27.4. This compound is known. [2]

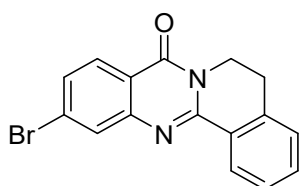

**11-bromo-5,6-dihydro-8H-isoquinolino[1,2-b]quinazolin-8-one(4l-**  
**from 2-aminophenone):** Yield 55%; white solid, m.p. 176.7~179.2 °C;  
 Yield 70%; white solid, m.p. 174.7~176.5 °C; <sup>1</sup>H NMR (500 MHz, CDCl<sub>3</sub>)  
 $\delta$  8.37 (d,  $J = 7.4$  Hz, 1H), 8.06 (d,  $J = 8.4$  Hz, 1H), 7.87 (s, 1H), 7.51 –  
 7.32 (m, 3H), 7.24 – 7.16 (m, 1H), 4.41 – 4.21 (m, 2H), 3.09 – 2.94 (m,  
 2H); <sup>13</sup>C NMR (126 MHz, CDCl<sub>3</sub>)  $\delta$  161.3, 150.5, 148.8, 137.1, 132.1,  
 130.3, 129.8, 129.2, 128.9, 128.4, 128.2, 127.7, 127.6, 119.5, 39.7, 27.3.

This compound is known. [7]

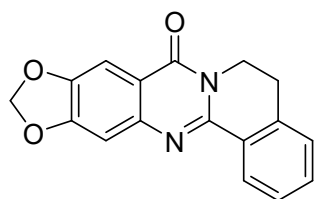

**5,6-dihydro-8H- [1,3] dioxolo[4,5-g] isoquinolino[1,2-b] quinazolin-8-**  
**one(4q):** Yield 21%; white solid, m.p. 200.9~203.1 °C; <sup>1</sup>H NMR (400  
 MHz, CDCl<sub>3</sub>)  $\delta$  8.42 (d,  $J = 7.4$  Hz, 1H), 7.62 (s, 1H), 7.44 (p,  $J = 6.9$  Hz,  
 2H), 7.26 (s, 1H), 7.12 (s, 1H), 6.10 (s, 2H), 4.39 (t,  $J = 6.4$  Hz, 2H), 3.09

(t,  $J = 6.3$  Hz, 2H);  $^{13}\text{C}$  NMR (101 MHz,  $\text{CDCl}_3$ )  $\delta$  161.0, 148.2, 147.4, 145.8, 136.8, 131.5, 129.6, 127.7, 127.6, 127.5, 115.8, 105.8, 102.1, 39.6, 27.5. This compound is known. [1]

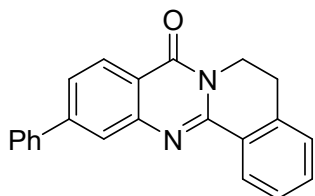

**11-phenyl-5,6-dihydro-8H-isoquinolino[1,2-b]quinazolin-8-one(5a):**

Yield 81%; light yellow solid, m.p.188.5-189.7°C;  $^1\text{H}$  NMR (500 MHz,  $\text{CDCl}_3$ )  $\delta$  8.51 (d,  $J = 7.5$  Hz, 1H), 8.36 (d,  $J = 8.3$  Hz, 1H), 8.01 (s, 1H), 7.77 – 7.68 (m, 3H), 7.53 – 7.40 (m, 5H), 7.30 (d,  $J = 7.2$  Hz, 1H), 4.43 (t,  $J = 6.5$  Hz, 2H), 3.12 (t,  $J = 6.4$  Hz, 2H);  $^{13}\text{C}$  NMR (126 MHz,  $\text{CDCl}_3$ )  $\delta$  161.6, 148.1, 147.1, 139.8, 137.2, 131.9, 129.5, 129.0, 128.4, 128.1, 127.7, 127.6, 127.5, 127.4, 125.8, 125.6, 39.6, 27.5. This compound is known. [4]

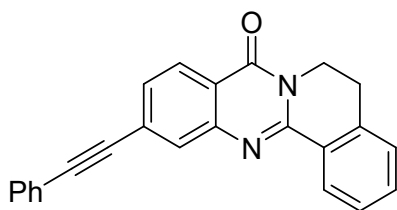

**11-(phenylethynyl)-5,6-dihydro-8H-isoquinolino[1,2-b]quinazolin-8-**

**one(5b):** Yield 78%; light yellow solid, m.p.196.5-197.7°C;  $^1\text{H}$  NMR (500 MHz,  $\text{CDCl}_3$ )  $\delta$  8.48 (d,  $J = 7.1$  Hz, 1H), 8.26 (d,  $J = 8.2$  Hz, 1H), 7.93 (s, 1H), 7.61 – 7.54 (m, 3H), 7.51 – 7.42 (m, 3H), 7.41 – 7.36 (m, 3H), 7.30 – 7.27 (m, 1H), 4.43 – 4.39 (m, 2H), 3.10 (t,  $J = 6.4$  Hz, 2H);  $^{13}\text{C}$  NMR (126 MHz,  $\text{CDCl}_3$ )  $\delta$  161.3, 150.0, 147.7, 132.0, 131.9, 130.5,

129.3, 128.5, 128.2, 127.7, 127.6, 127.0, 126.6, 92.6, 88.6, 39.7, 27.4.

This compound is known. [4]

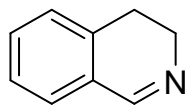

**3,4-dihydroisoquinoline (6):** Yield 90%; light yellow liquid; <sup>1</sup>H NMR (500 MHz, CDCl<sub>3</sub>) δ 8.35 (s, 1H), 7.36 (t, J = 7.2 Hz, 1H), 7.29 (q, J = 7.6 Hz, 2H), 7.16 (d, J = 7.3 Hz, 1H), 3.77 (t, J = 6.8 Hz, 2H), 2.78 – 2.73 (m, 2H); <sup>13</sup>C NMR (126 MHz, CDCl<sub>3</sub>) δ 160.5, 136.6, 131.2, 128.5, 127.5, 127.3, 127.1, 47.3, 25.0. This compound is known. [7]

#### 4. Reference

- [1] Nam T S. Copper-catalyzed synthesis of pyrido-fused quinazolinones from 2-aminoarylmethanols and isoquinolines or tetrahydroisoquinolines[J]. *Organic & Biomolecular Chemistry*, 2021, 19(21): 4726-4732.
- [2] Wang D, Xiao F, Zhang F, et al. Copper-Catalyzed Aerobic Oxidative Ring Expansion of Isatins: A Facile Entry to Isoquinolino-Fused Quinazolinones[J]. *Chinese Journal of Chemistry*, 2021, 39(1): 87-92.
- [3] Li J, Wang Z B, Xu Y, et al. Catalyst-free cyclization of anthranils and cyclic amines: one-step synthesis of rutaecarpine[J]. *Chemical Communications*, 2019, 55(80): 12072-12075.
- [4] Jia F C, Chen T Z, Hu X Q. TFA/TBHP-promoted oxidative cyclisation for the construction of tetracyclic quinazolinones and rutaecarpine[J]. *Organic Chemistry Frontiers*, 2020, 7(13): 1635-1639.
- [5] Xie L, Lu C, Jing D, et al. Metal-free synthesis of polycyclic quinazolinones enabled by a (NH<sub>4</sub>)<sub>2</sub>S<sub>2</sub>O<sub>8</sub>-promoted intramolecular oxidative cyclization[J].

European Journal of Organic Chemistry, 2019, 2019(22): 3649-3653.

- [6] Gil C, Bräse S. Efficient Solid-Phase Synthesis of Highly Functionalized 1,4-Benzodiazepin-5-one Derivatives and Related Compounds by Intramolecular Aza-Wittig Reactions[J]. Chemistry—A European Journal, 2005, 11(9): 2680-2688.
- [7] Chen X, Xia F, Zhao Y, et al. TBHP-Mediated Oxidative Decarboxylative Cyclization in Water: Direct and Sustainable Access to Anti-malarial Polycyclic Fused Quinazolinones and Rutaecarpine[J]. Chinese Journal of Chemistry, 2020, 38(11): 1239-1244.

## 5. Spectral data for the compounds prepared

$^1\text{H}$  NMR ( $\text{CDCl}_3$ , 500 MHz) spectra of **4a**

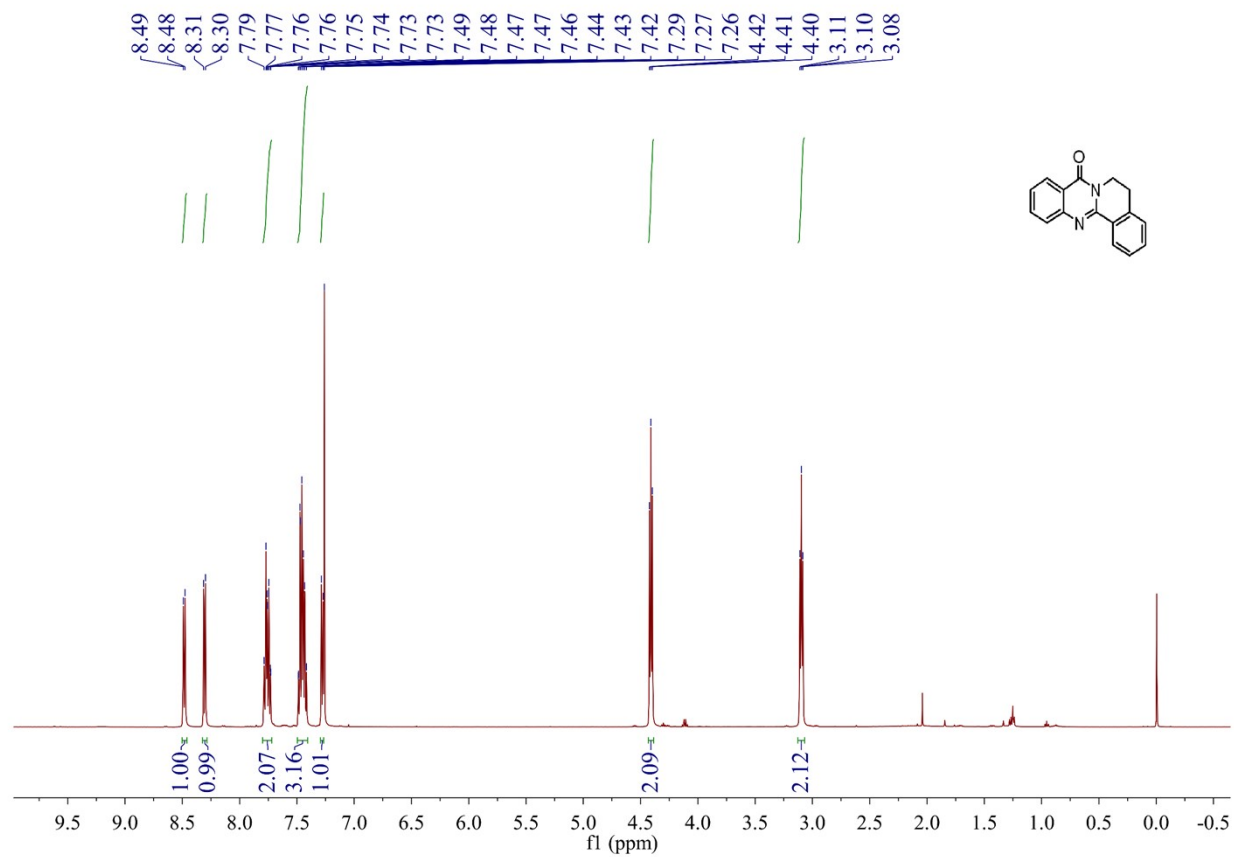



$^{13}\text{C}$  NMR ( $\text{CDCl}_3$ , 126 MHz) spectra of **4a**

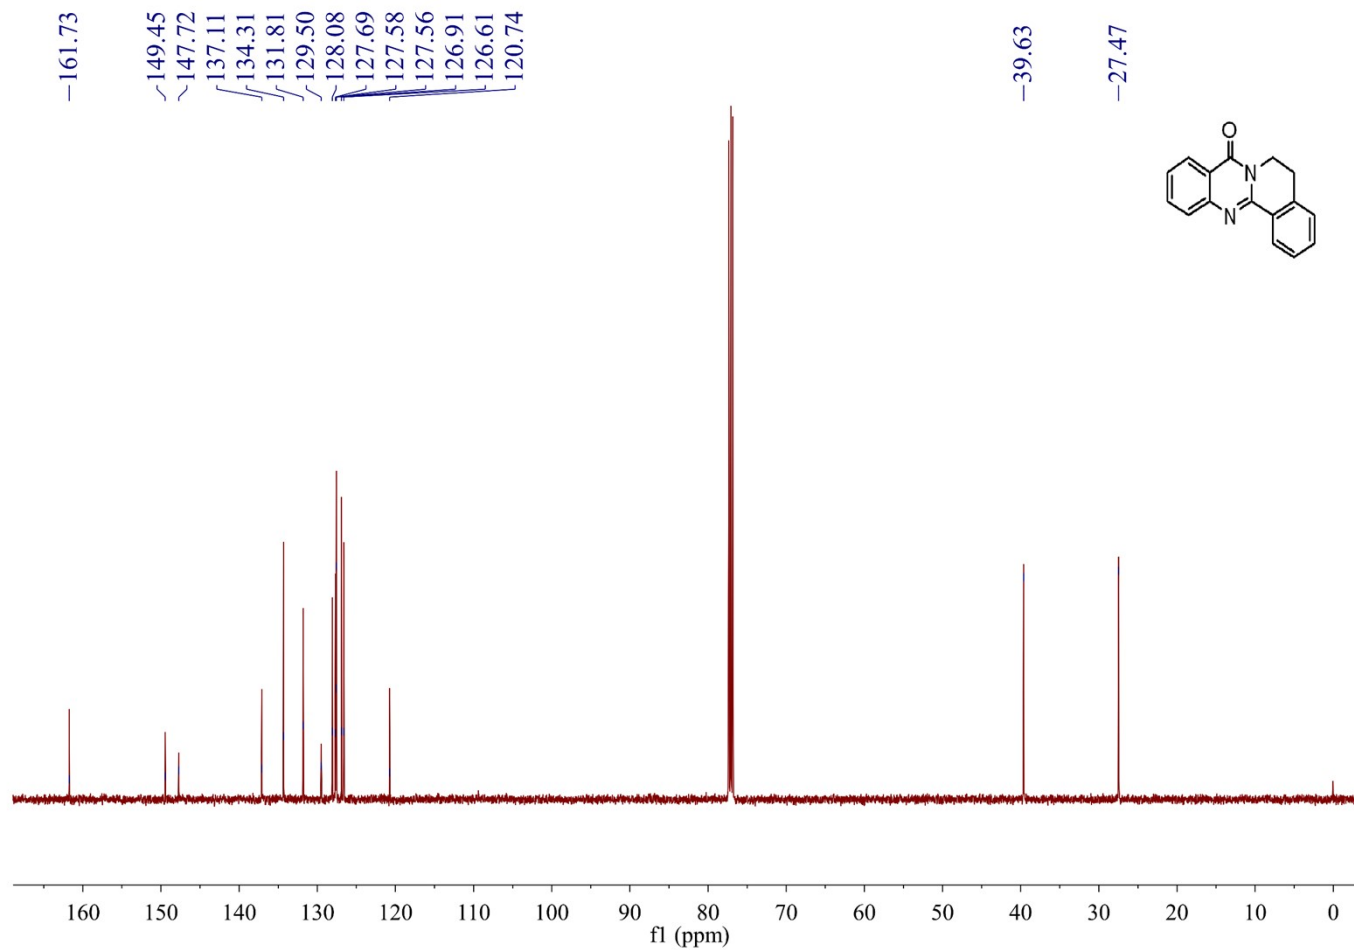

$^1\text{H}$  NMR ( $\text{CDCl}_3$ , 500 MHz) spectra of **4b**

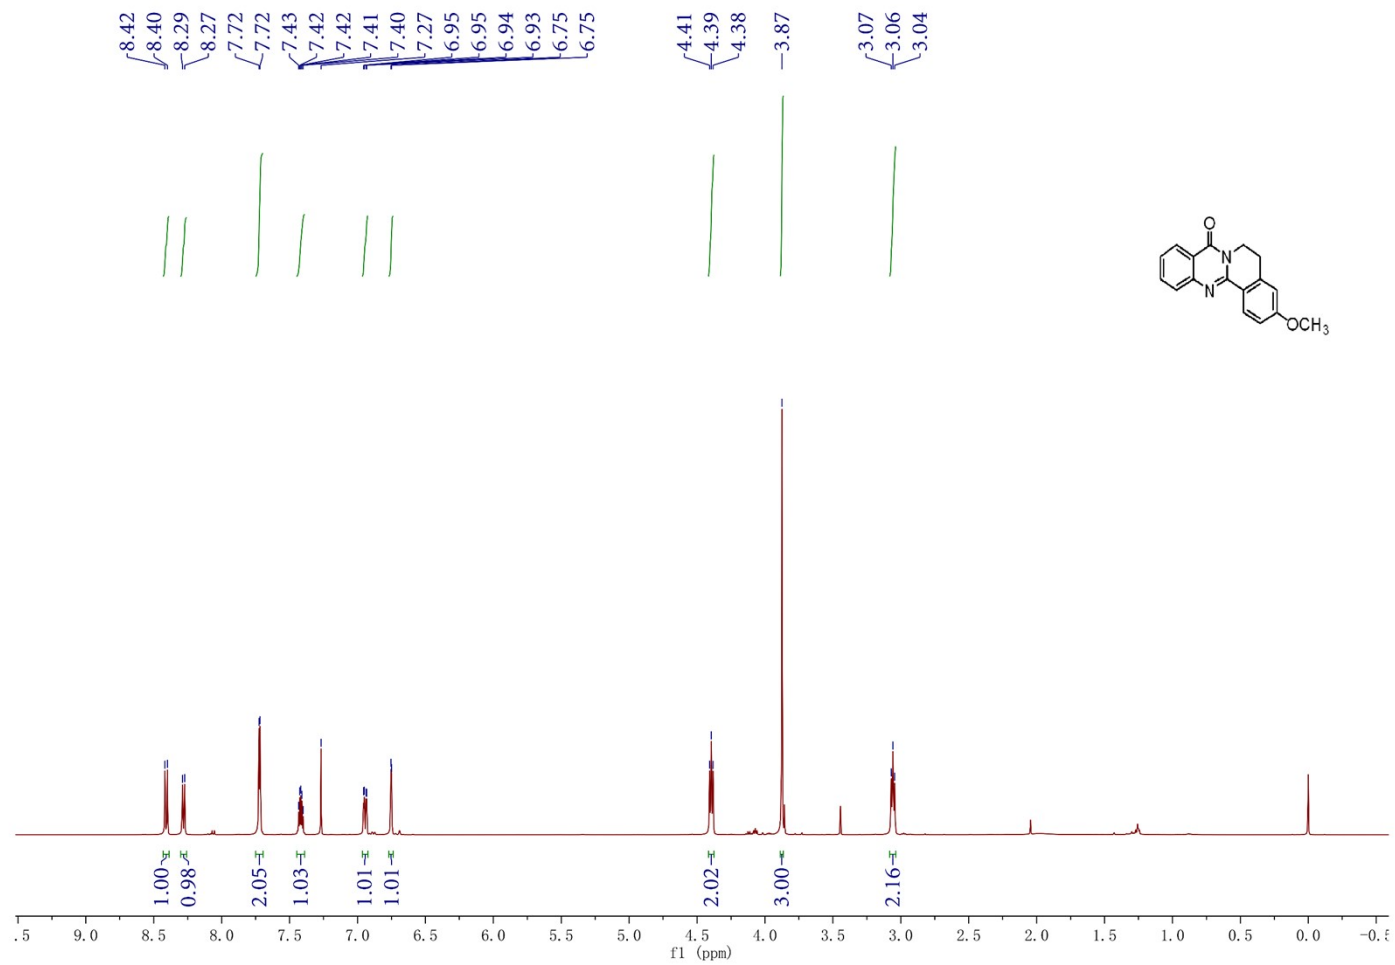

$^{13}\text{C}$  NMR ( $\text{CDCl}_3$ , 126 MHz) spectra of **4b**

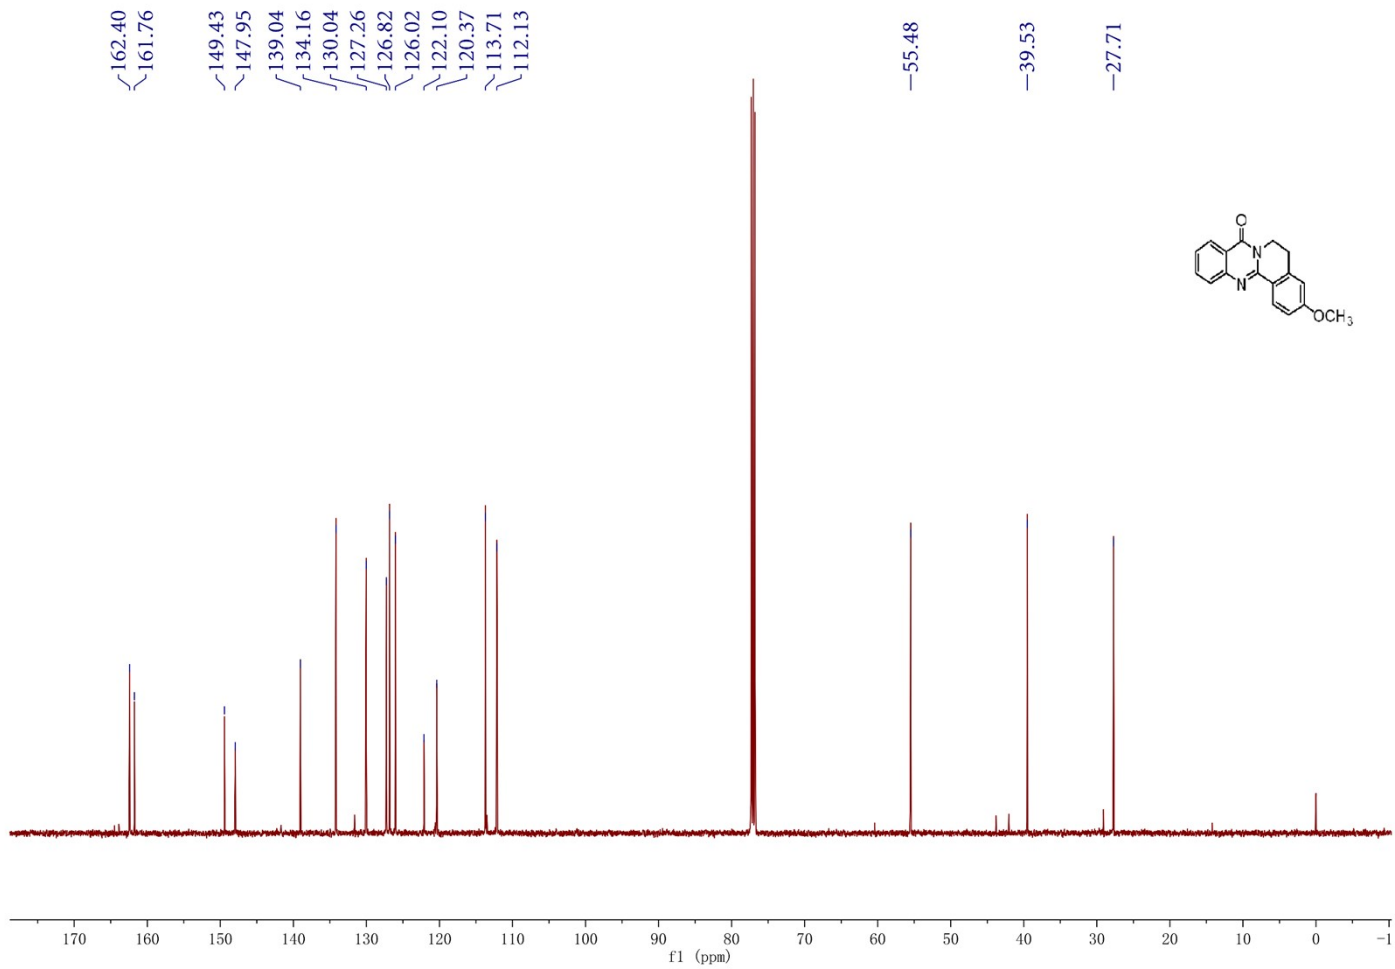

$^1\text{H}$  NMR ( $\text{CDCl}_3$ , 500 MHz) spectra of **4c**

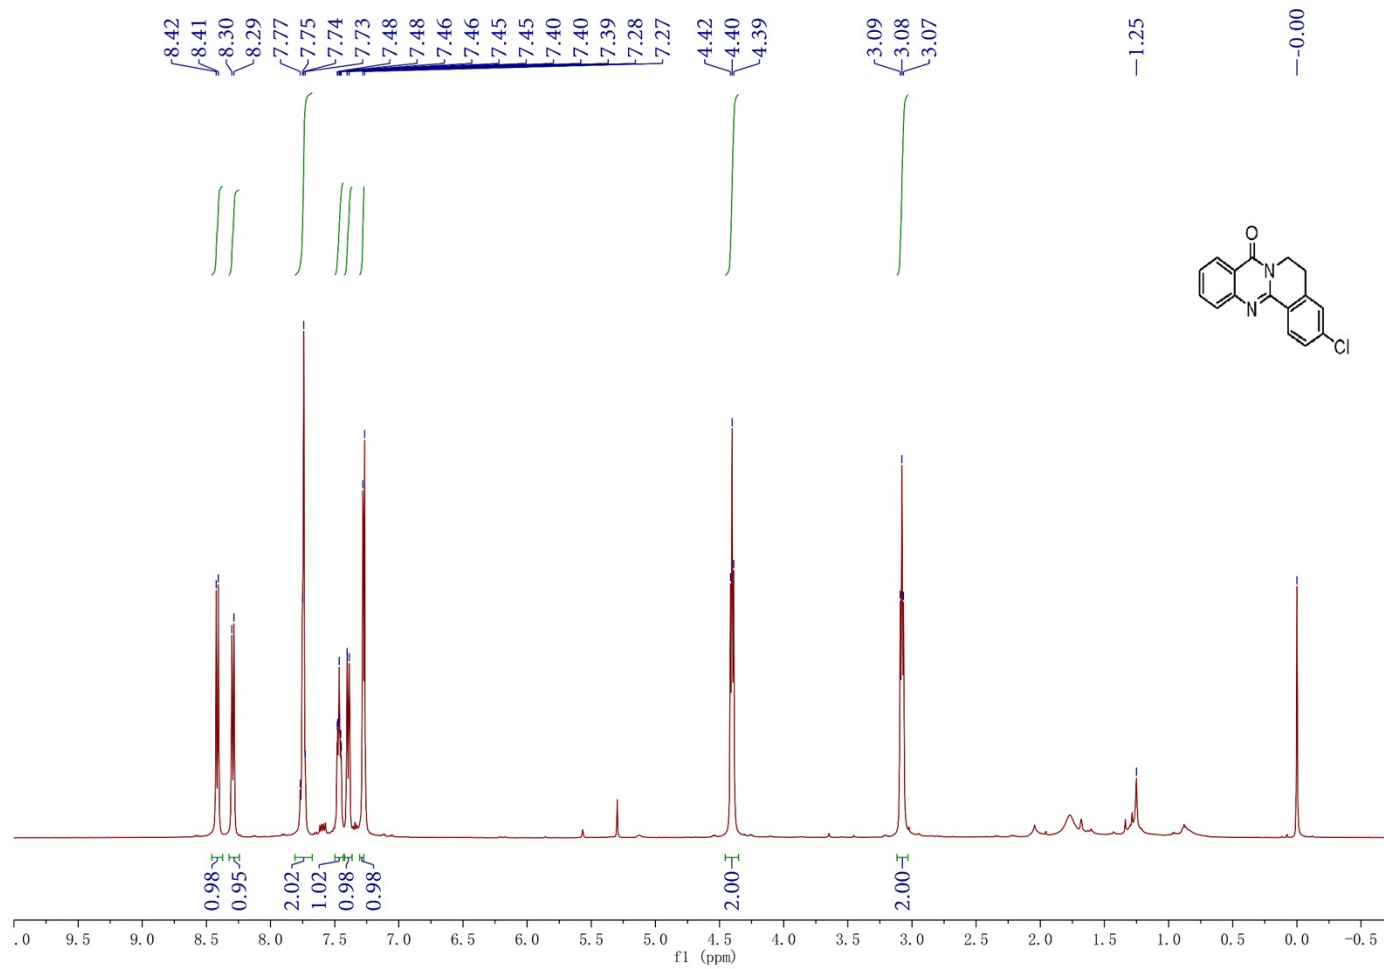

$^{13}\text{C}$  NMR ( $\text{CDCl}_3$ , 126 MHz) spectra of **4c**

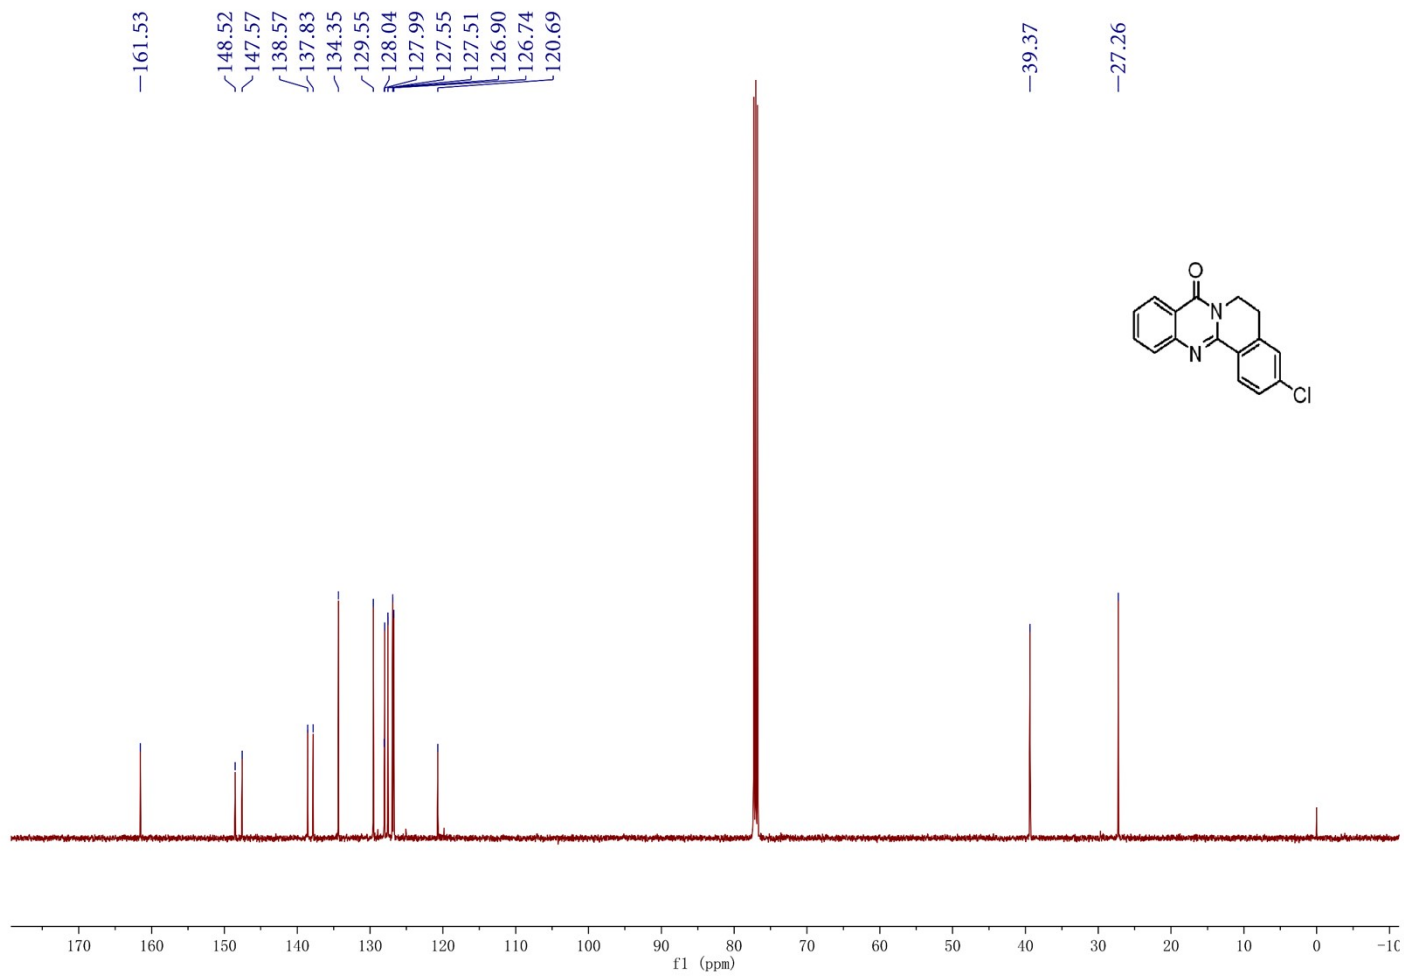

$^1\text{H}$  NMR ( $\text{CDCl}_3$ , 500 MHz) spectra of **4d**

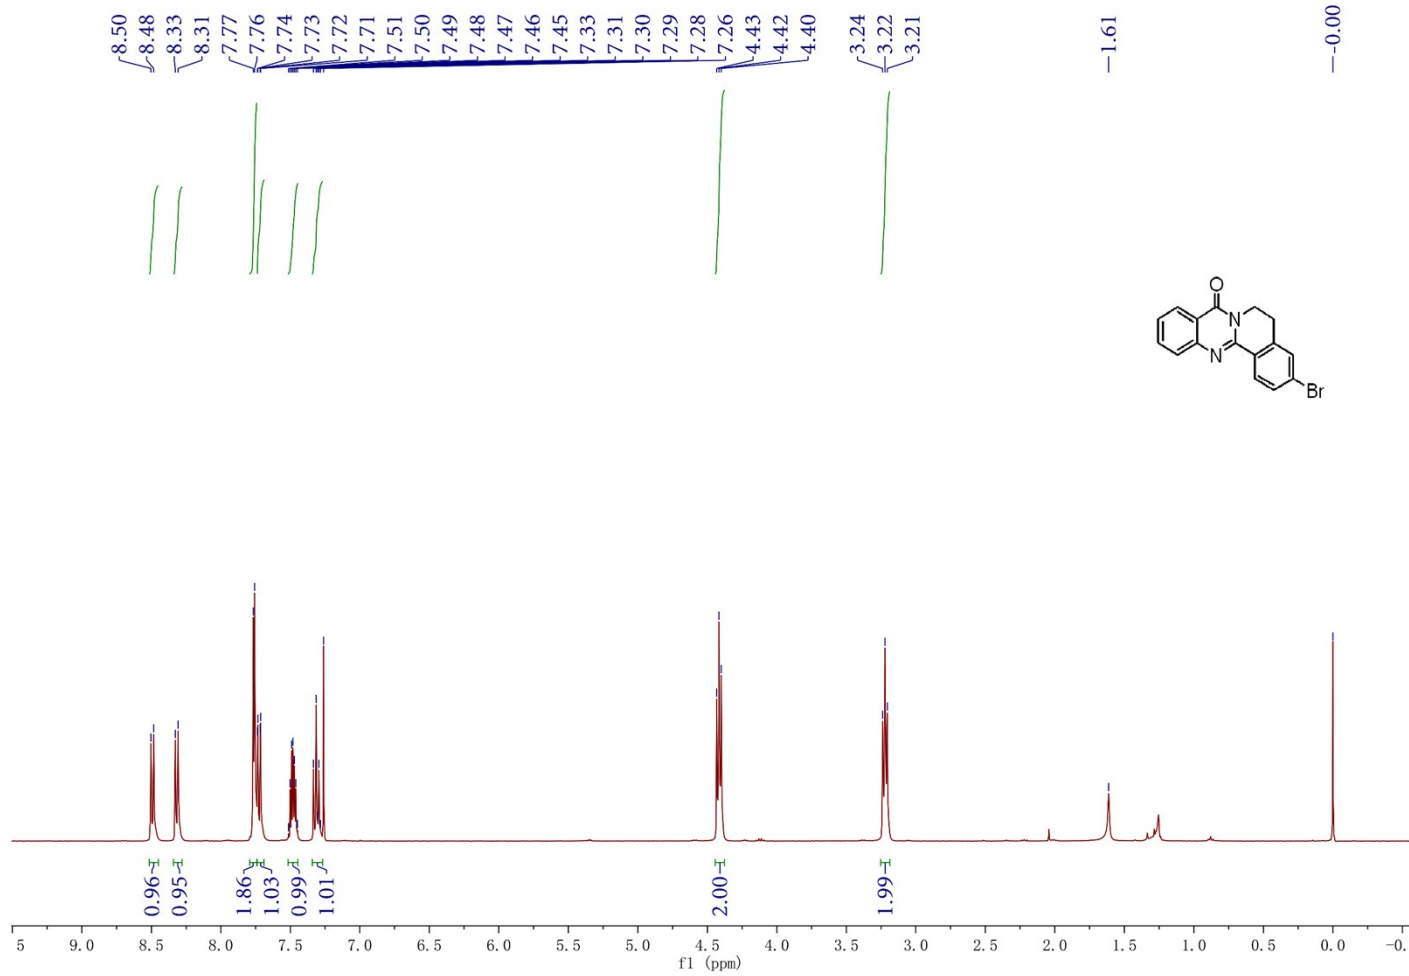

$^{13}\text{C}$  NMR ( $\text{CDCl}_3$ , 126 MHz) spectra of **4d**

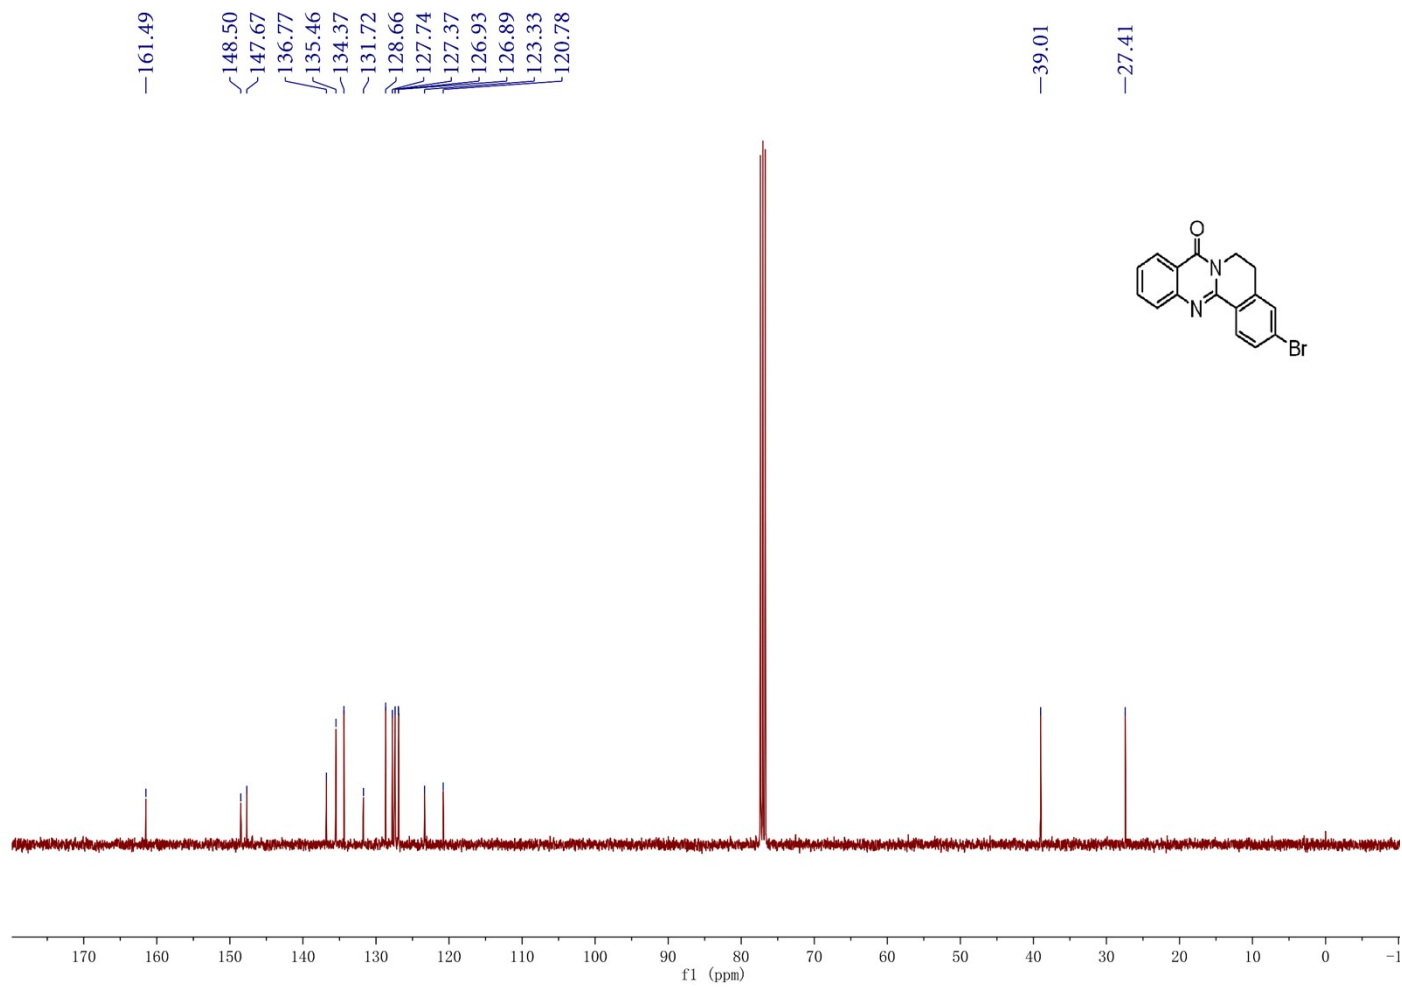

$^1\text{H}$  NMR ( $\text{CDCl}_3$ , 500 MHz) spectra of **4e**

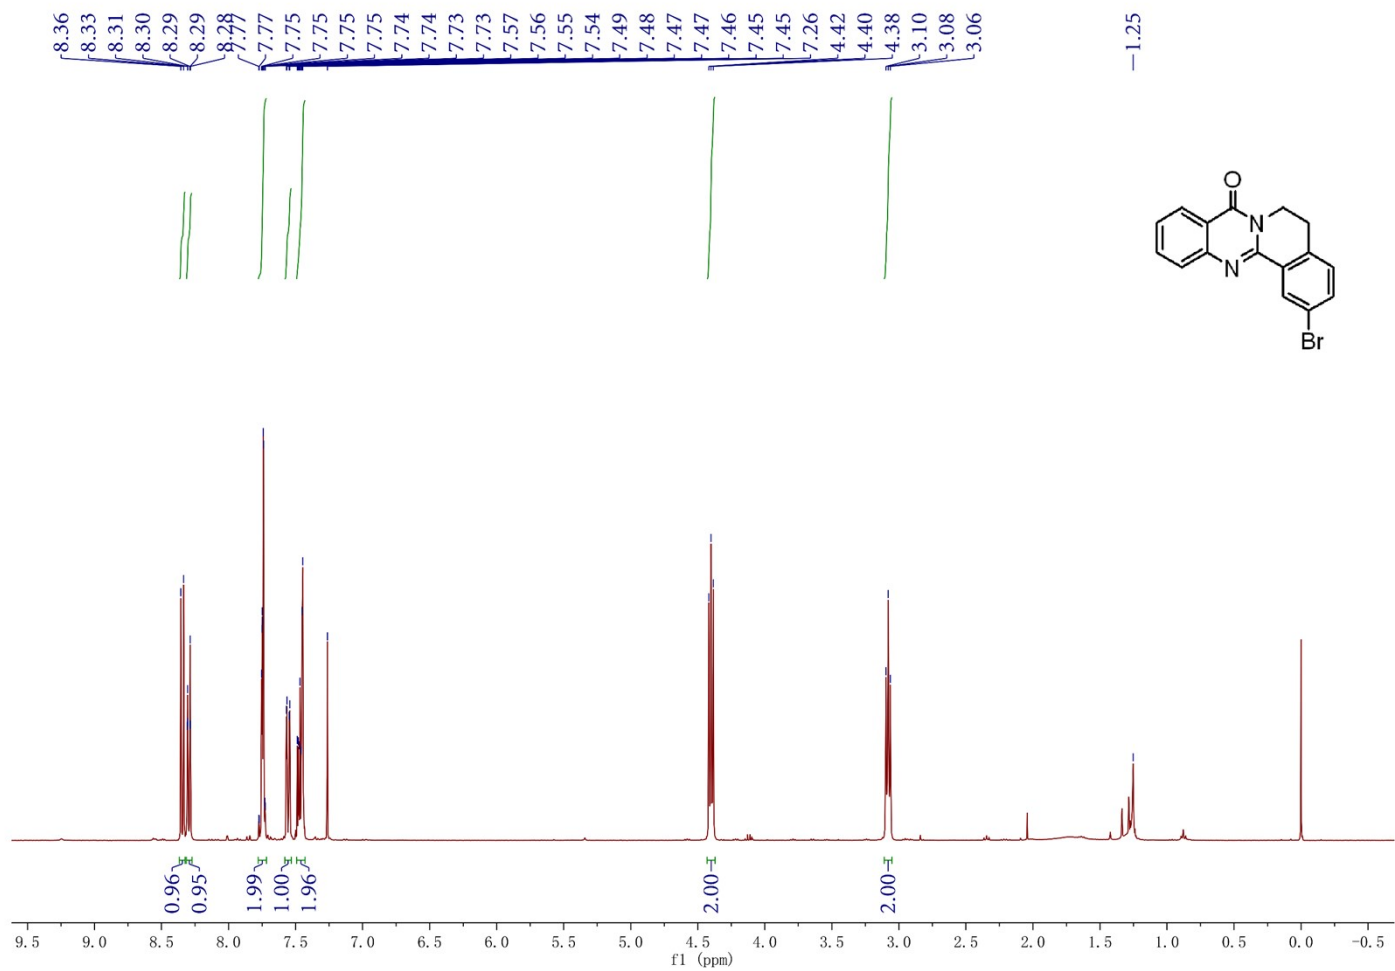



$^{13}\text{C}$  NMR ( $\text{CDCl}_3$ , 126 MHz) spectra of **4e**

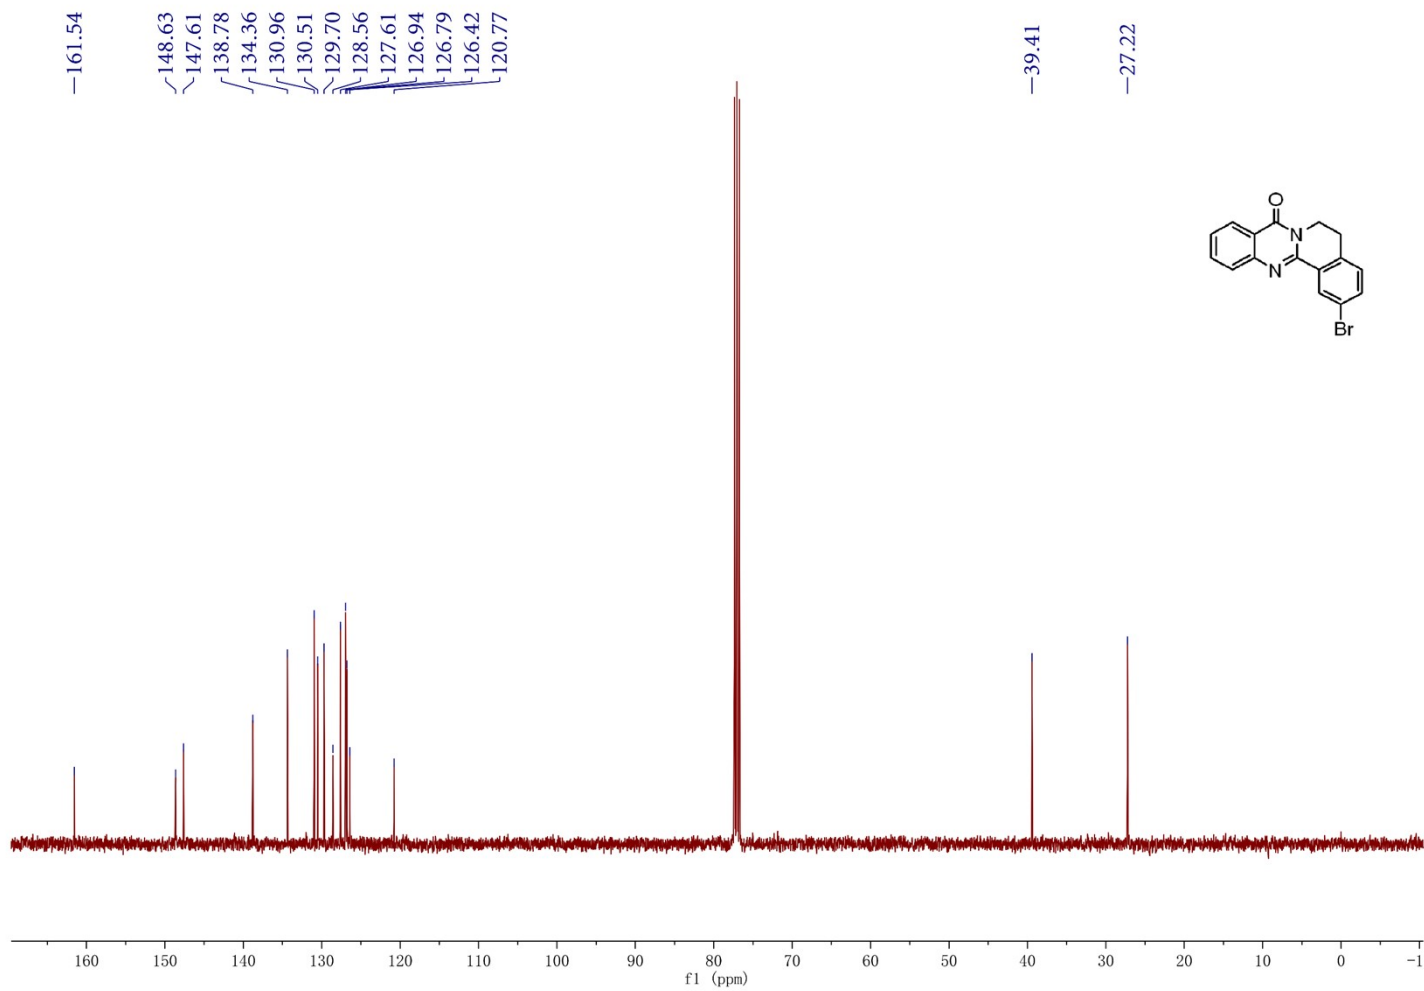

$^1\text{H}$  NMR ( $\text{CDCl}_3$ , 500 MHz) spectra of **4f**

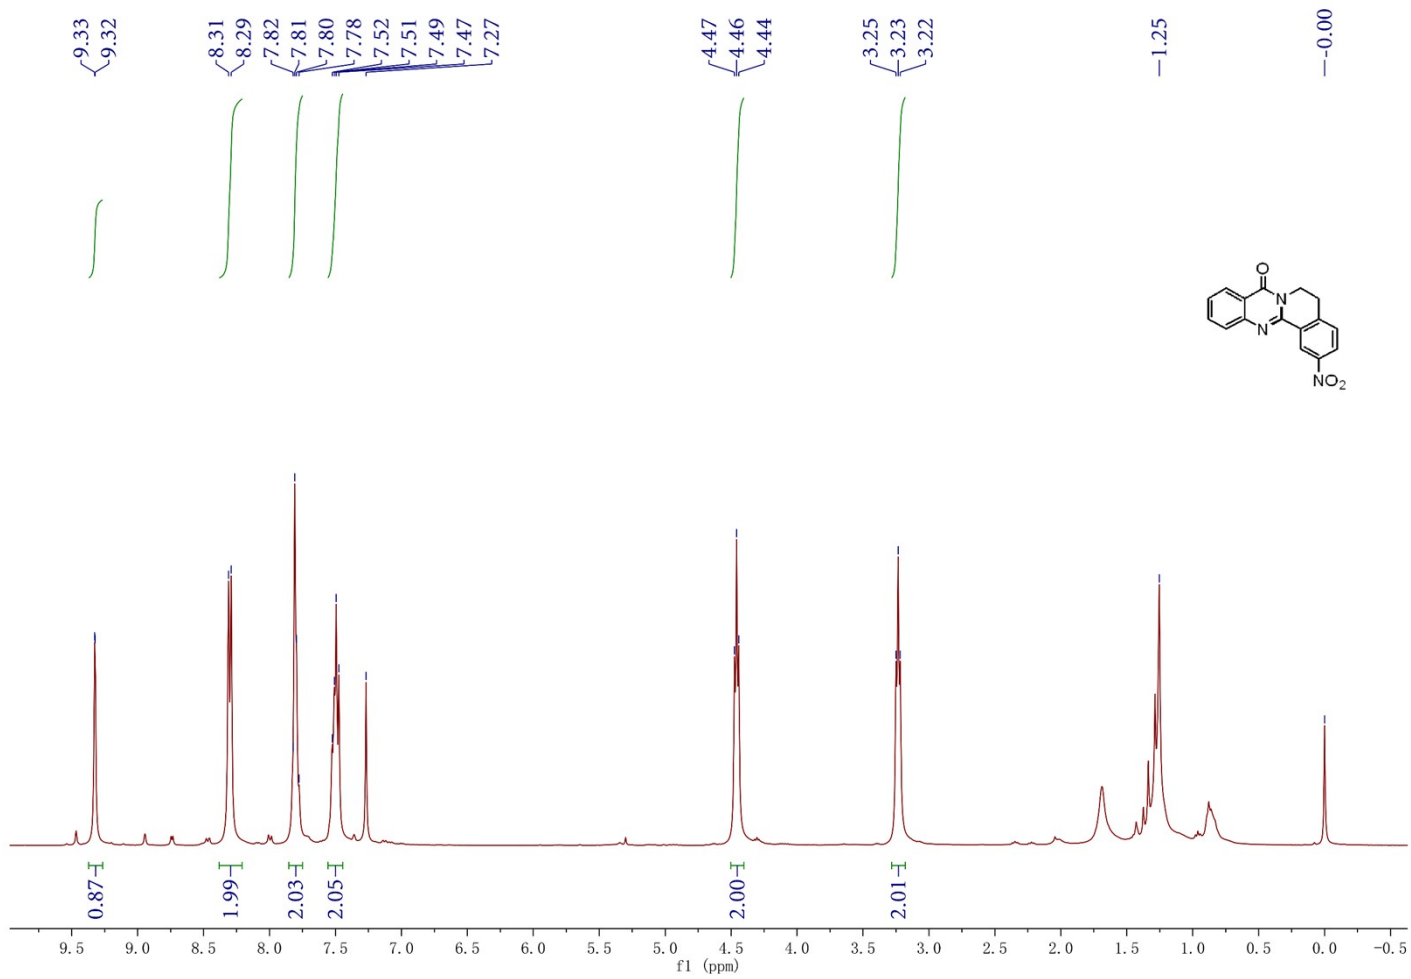

$^{13}\text{C}$  NMR ( $\text{CDCl}_3$ , 126 MHz) spectra of **4f**

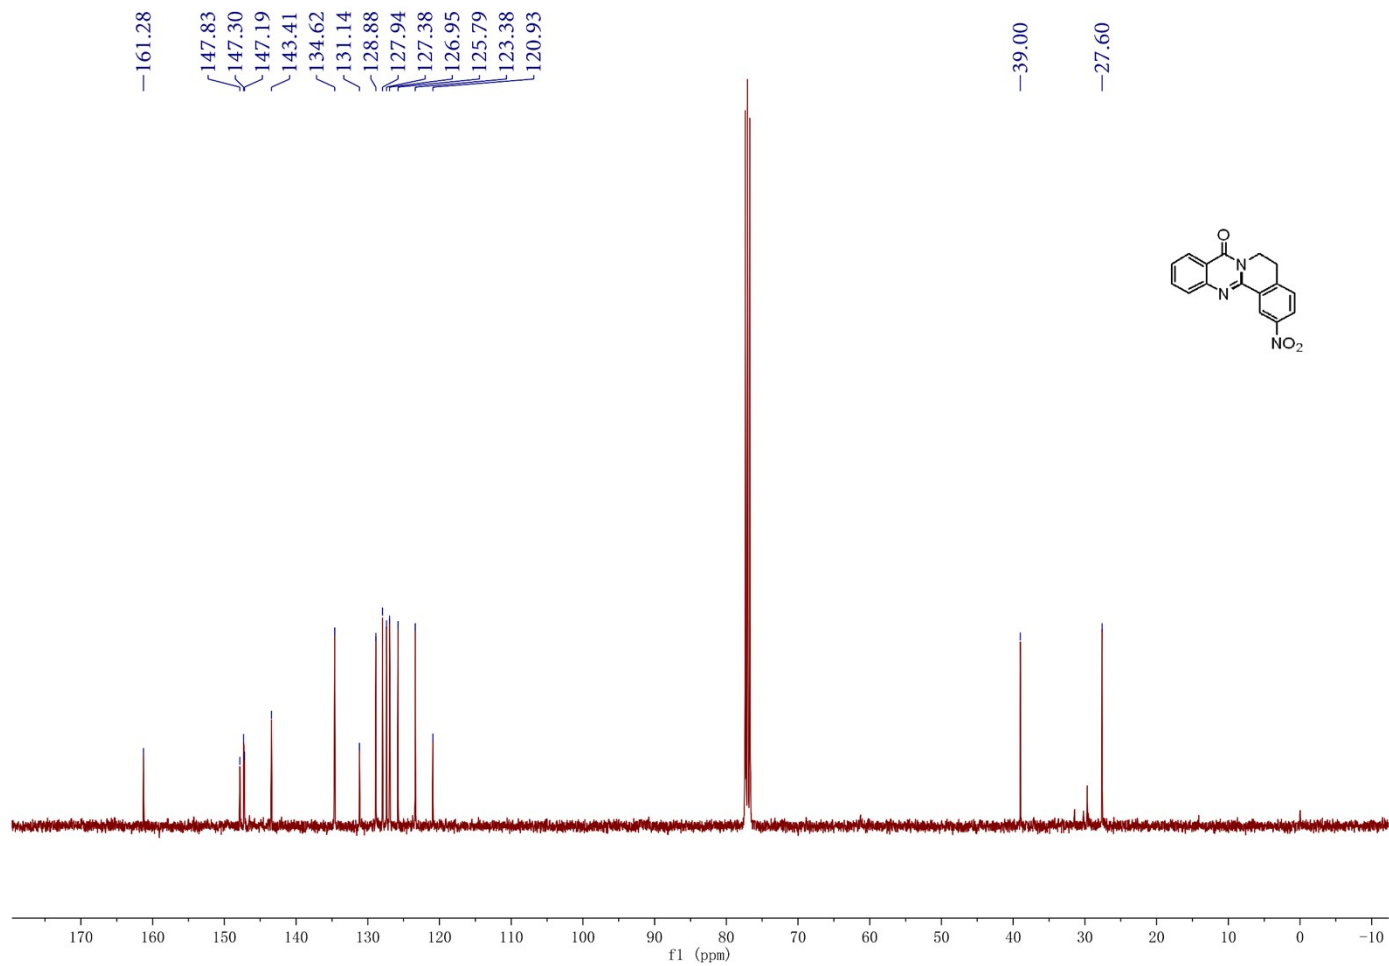

$^1\text{H}$  NMR ( $\text{CDCl}_3$ , 500 MHz) spectra of **4g**

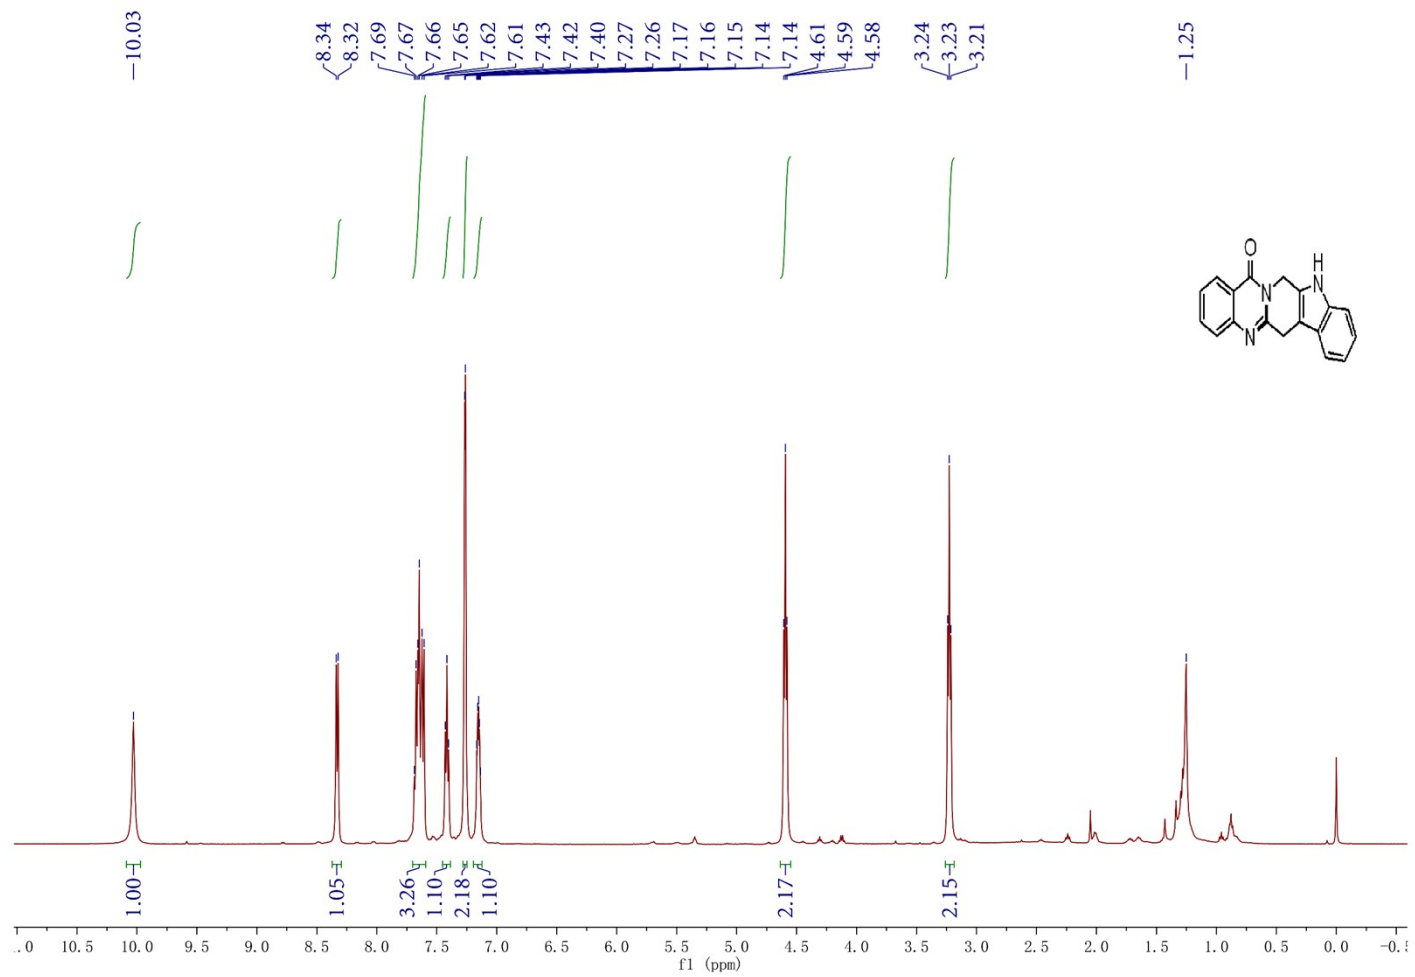

$^{13}\text{C}$  NMR ( $\text{CDCl}_3$ , 126 MHz) spectra of **4g**

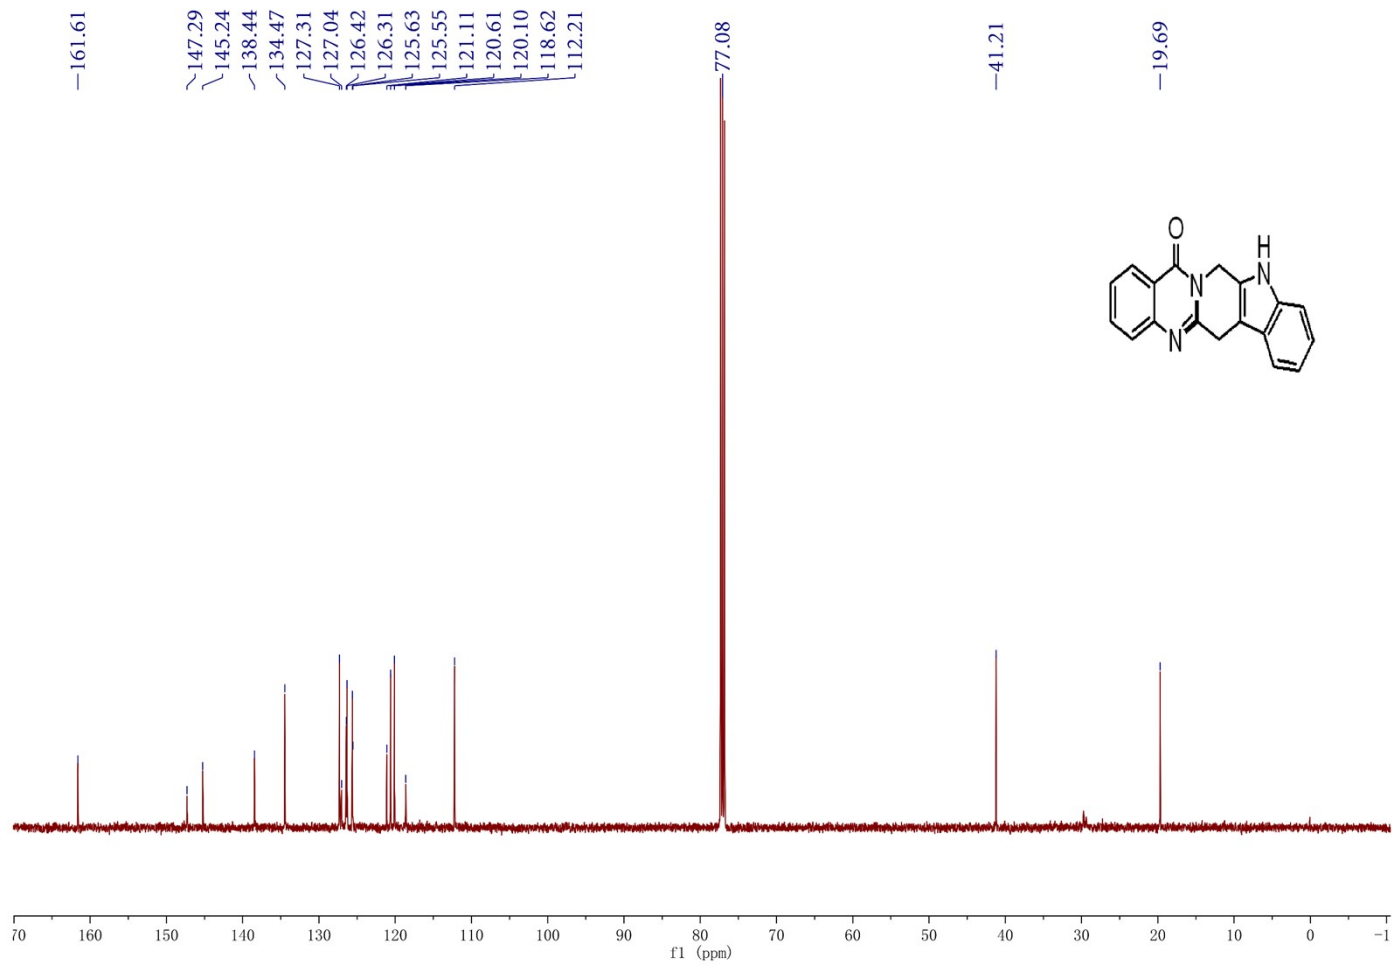

$^1\text{H}$  NMR ( $\text{CDCl}_3$ , 500 MHz) spectra of **4h**

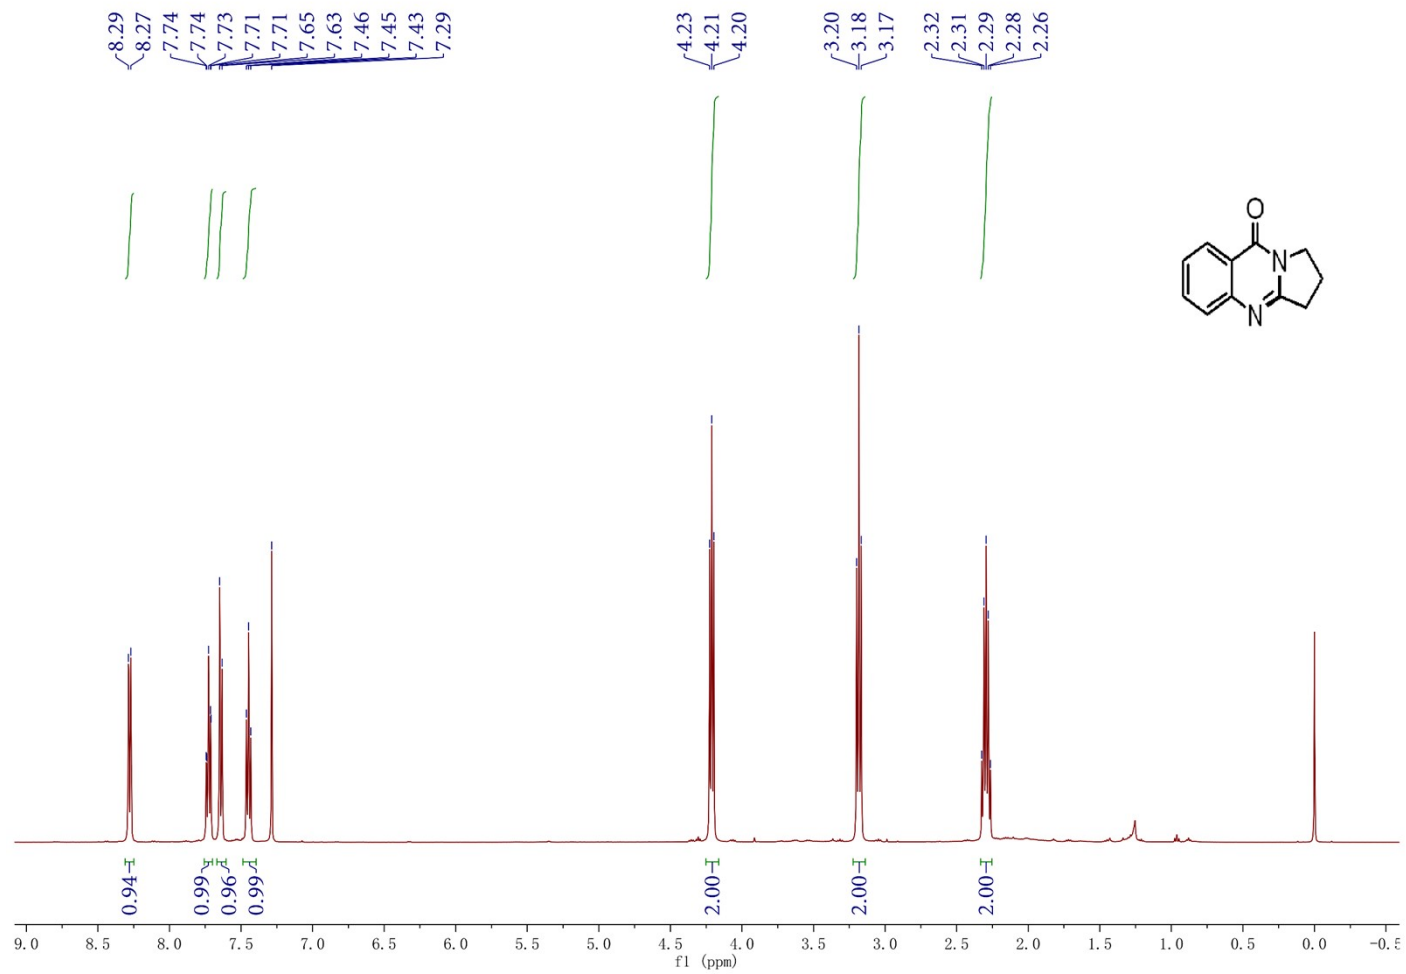

$^{13}\text{C}$  NMR ( $\text{CDCl}_3$ , 126 MHz) spectra of **4h**

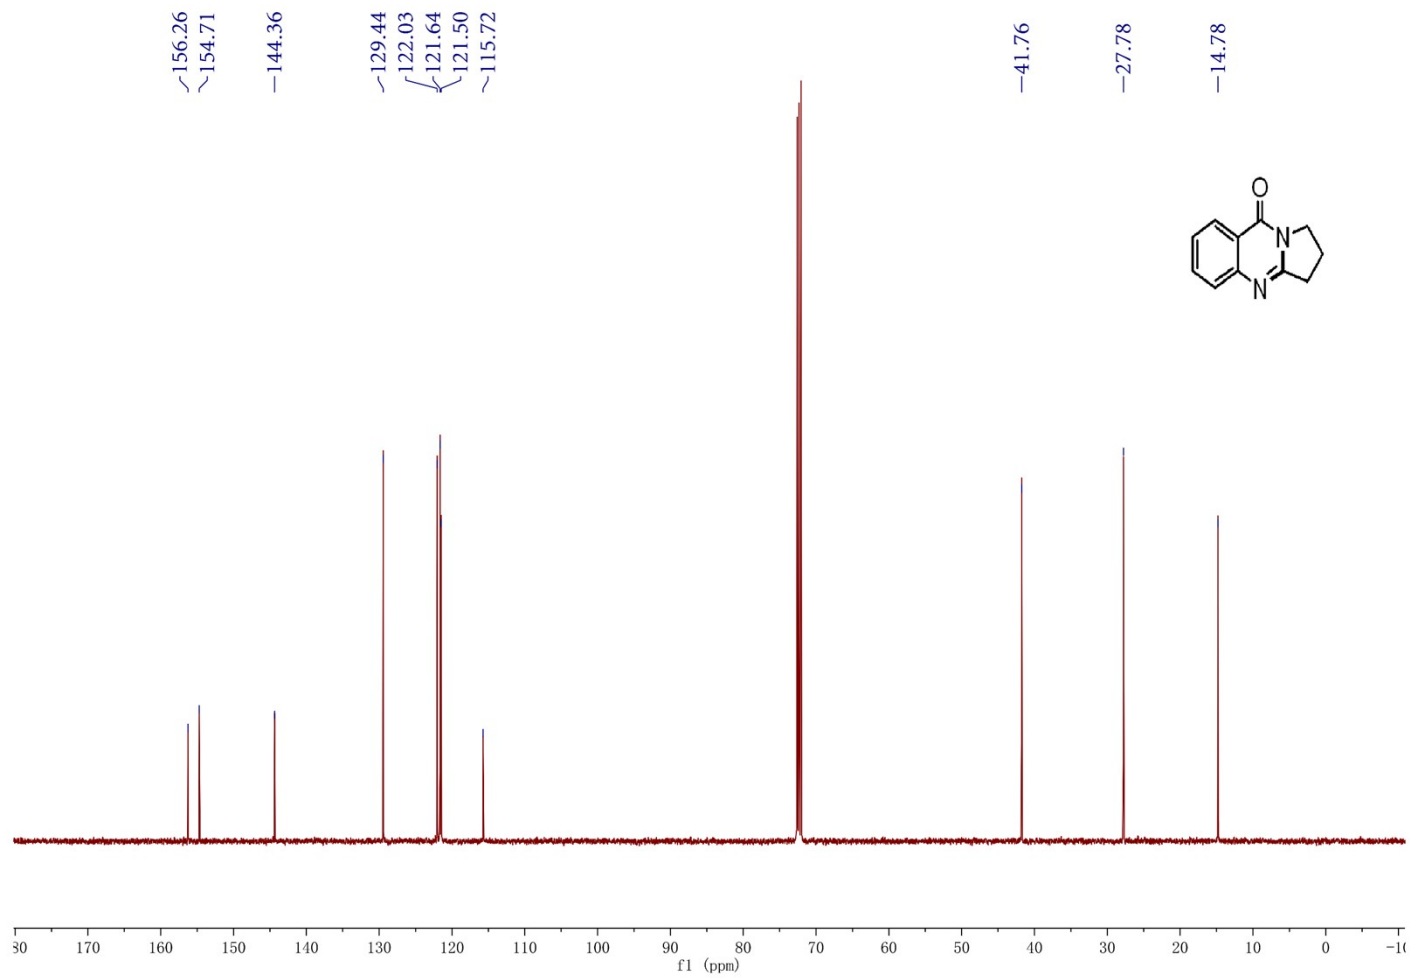

$^1\text{H}$  NMR ( $\text{CDCl}_3$ , 500 MHz) spectra of **4i**

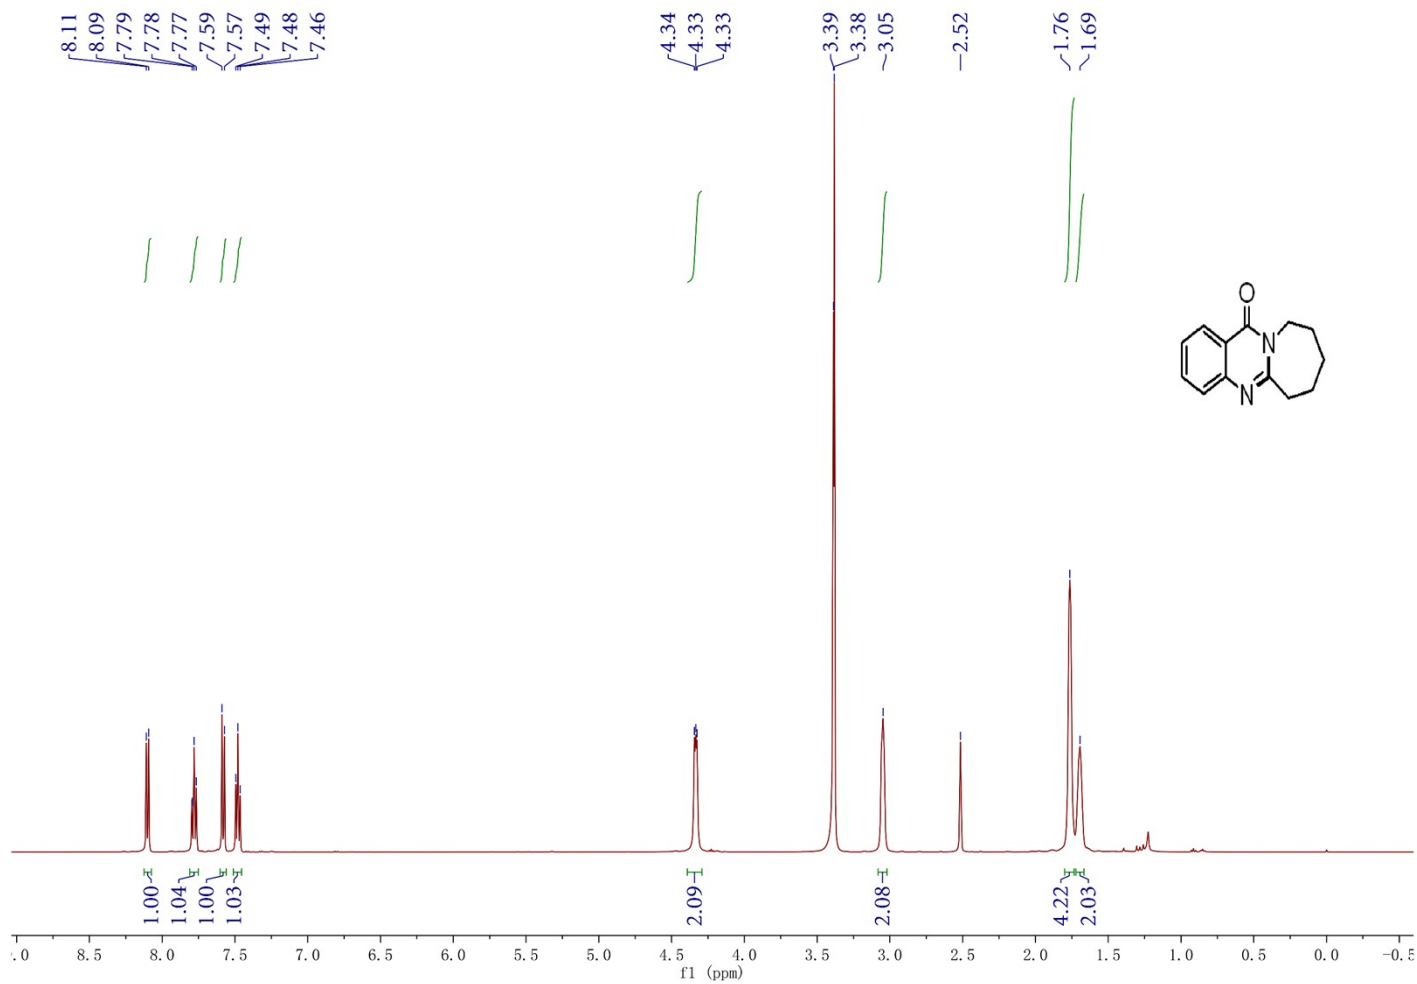



$^{13}\text{C}$  NMR ( $\text{CDCl}_3$ , 126 MHz) spectra of **4i**

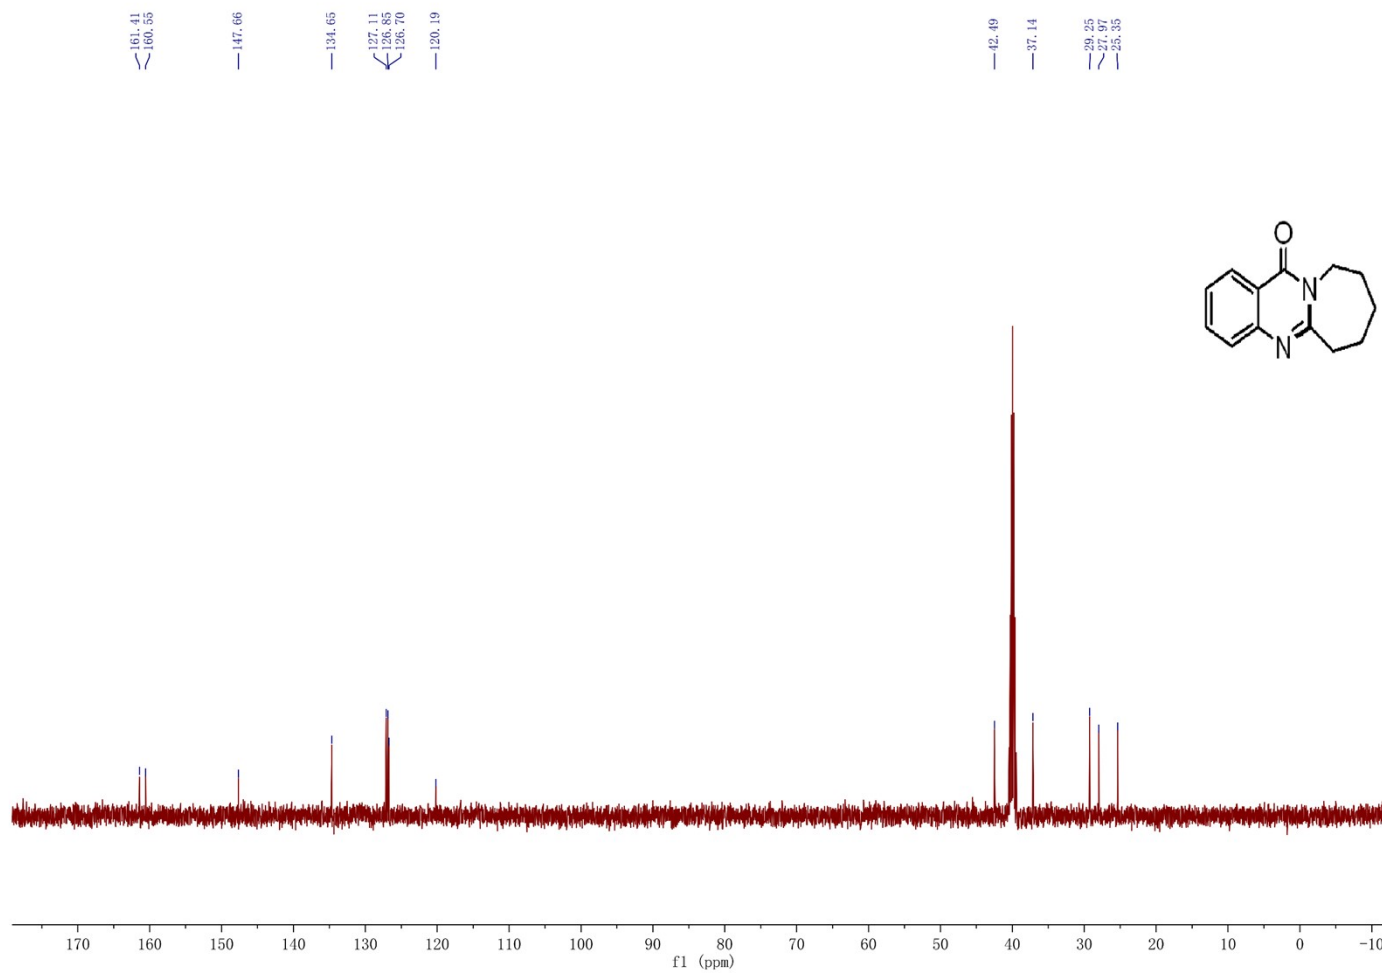

$^1\text{H}$  NMR ( $\text{CDCl}_3$ , 500 MHz) spectra of **4j**

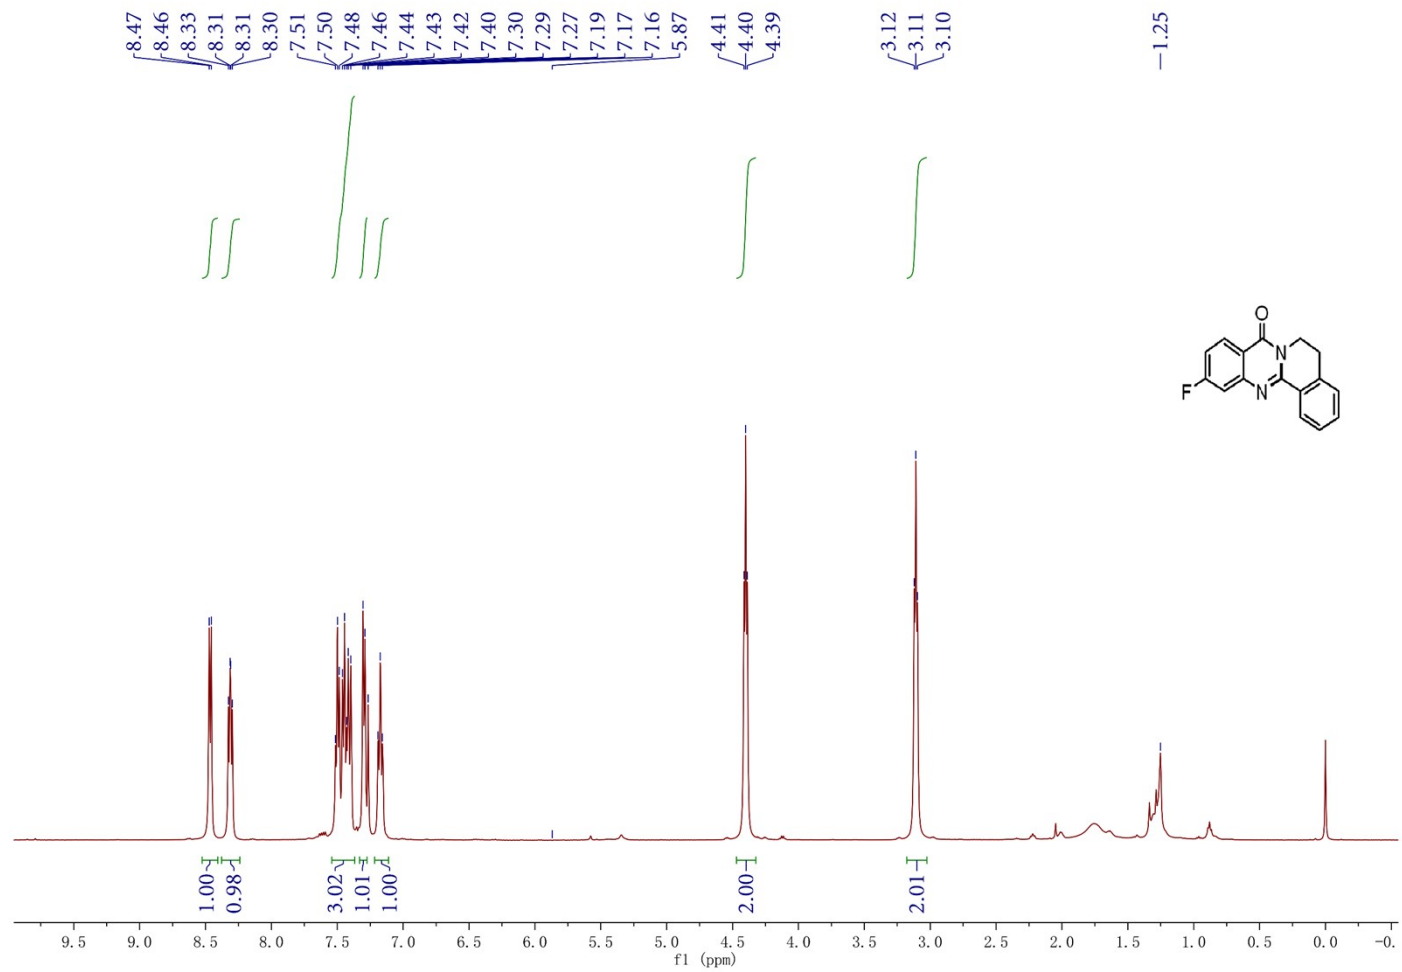

$^{13}\text{C}$  NMR ( $\text{CDCl}_3$ , 126 MHz) spectra of **4j**

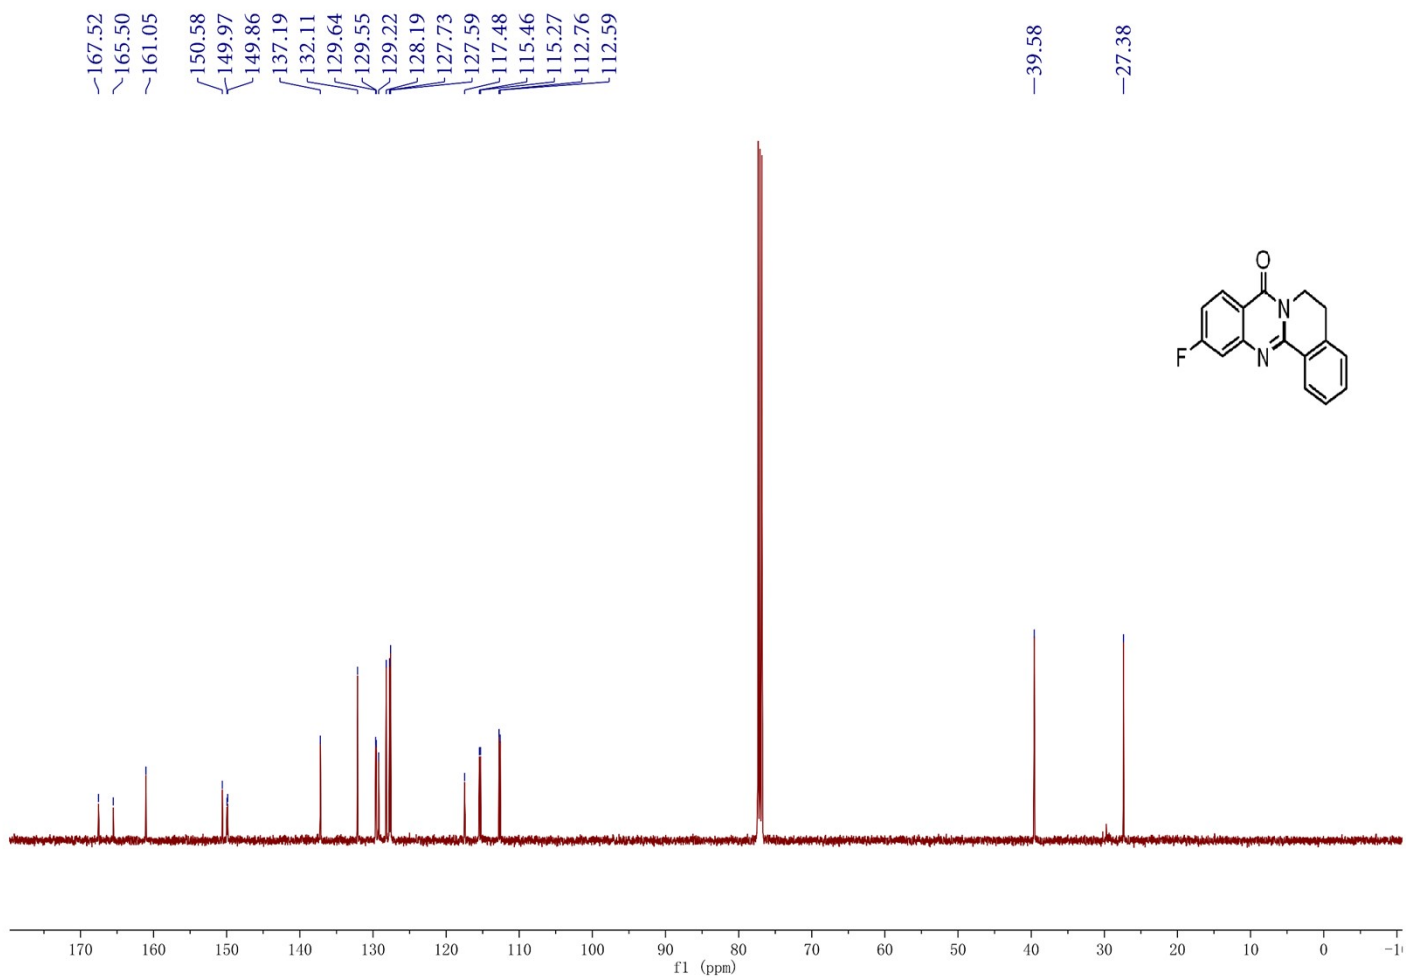

$^1\text{H}$  NMR ( $\text{CDCl}_3$ , 500 MHz) spectra of **4k**

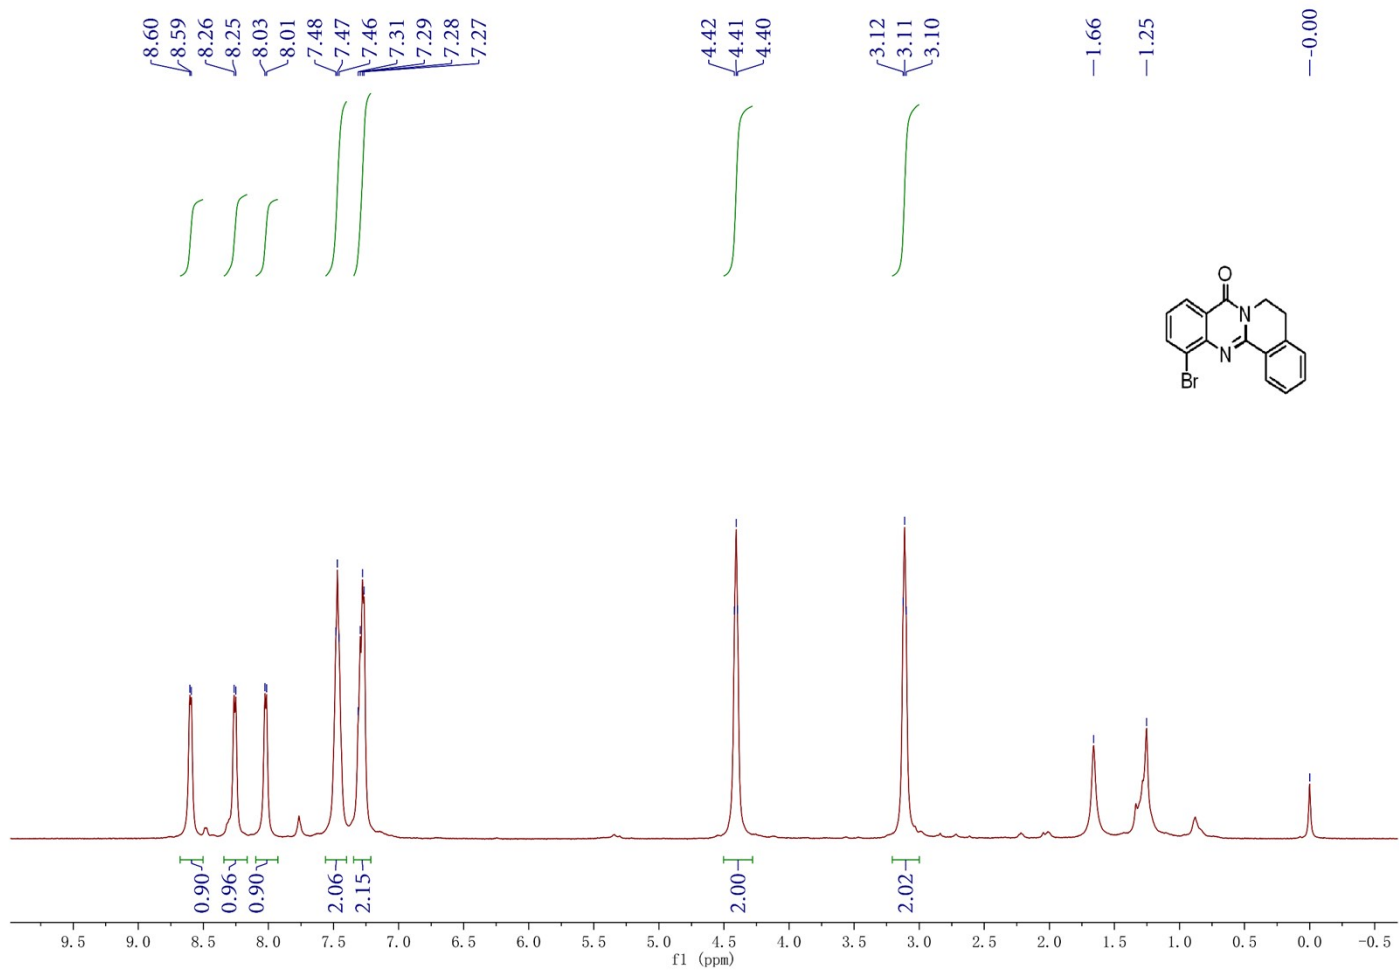

$^{13}\text{C}$  NMR ( $\text{CDCl}_3$ , 126 MHz) spectra of **4k**

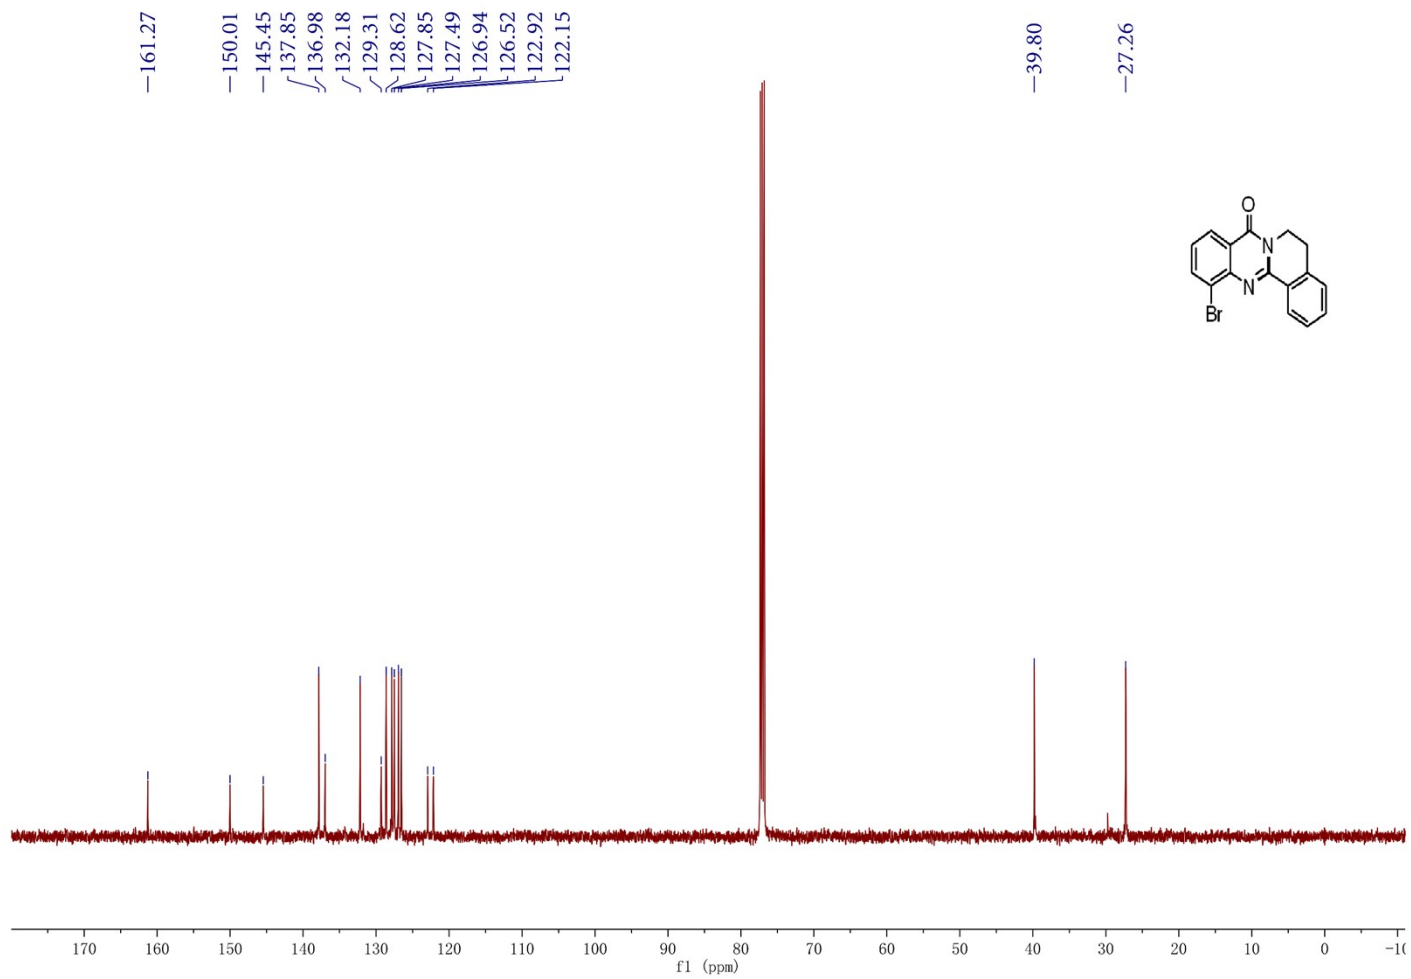

$^1\text{H}$  NMR ( $\text{CDCl}_3$ , 500 MHz) spectra of **4I**

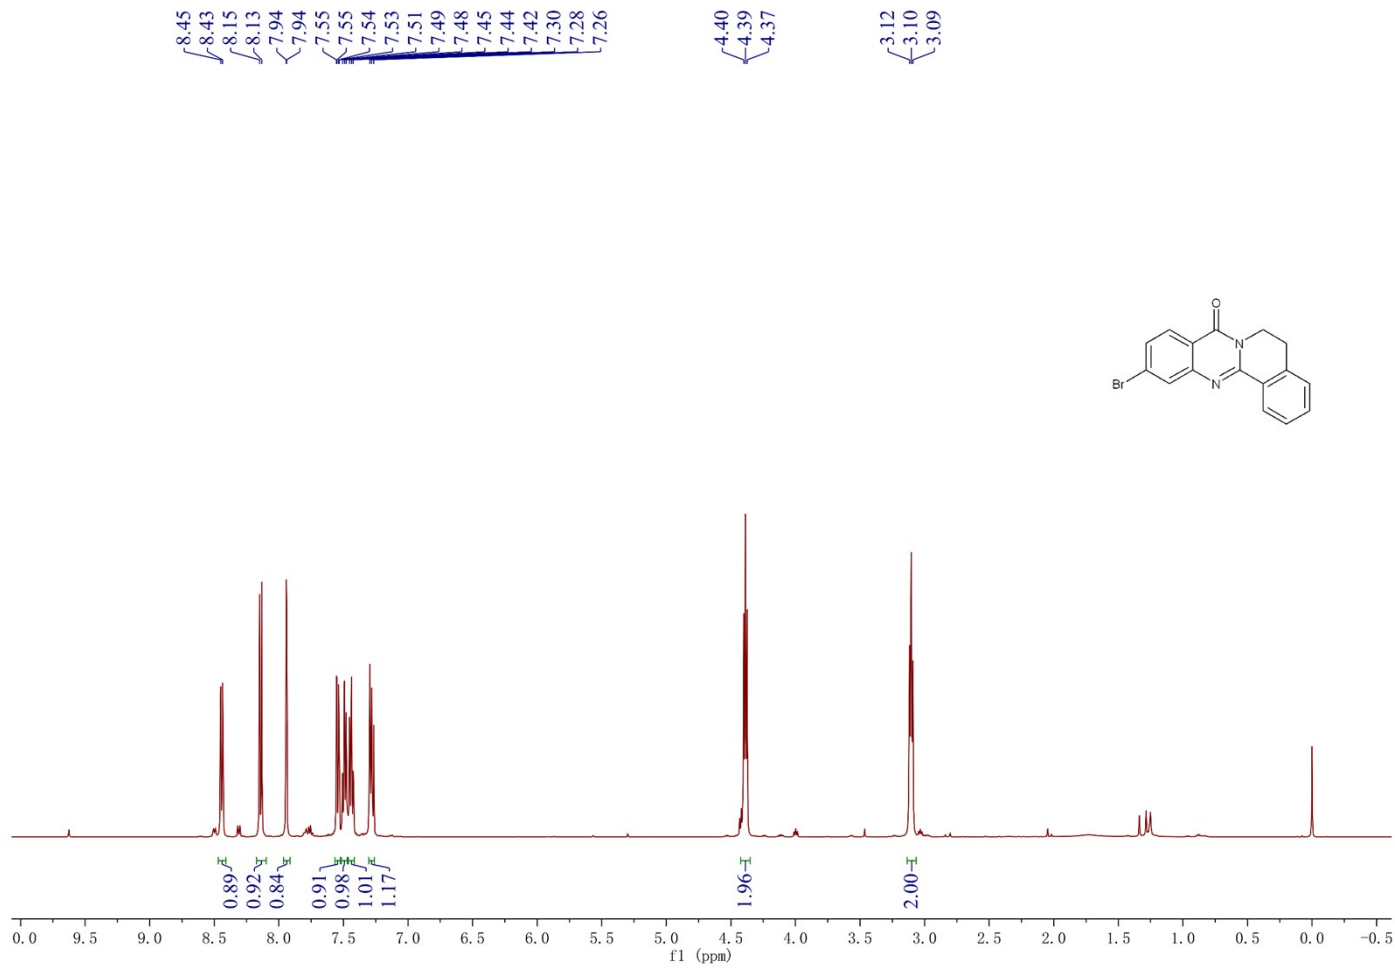

$^{13}\text{C}$  NMR ( $\text{CDCl}_3$ , 126 MHz) spectra of **4l**

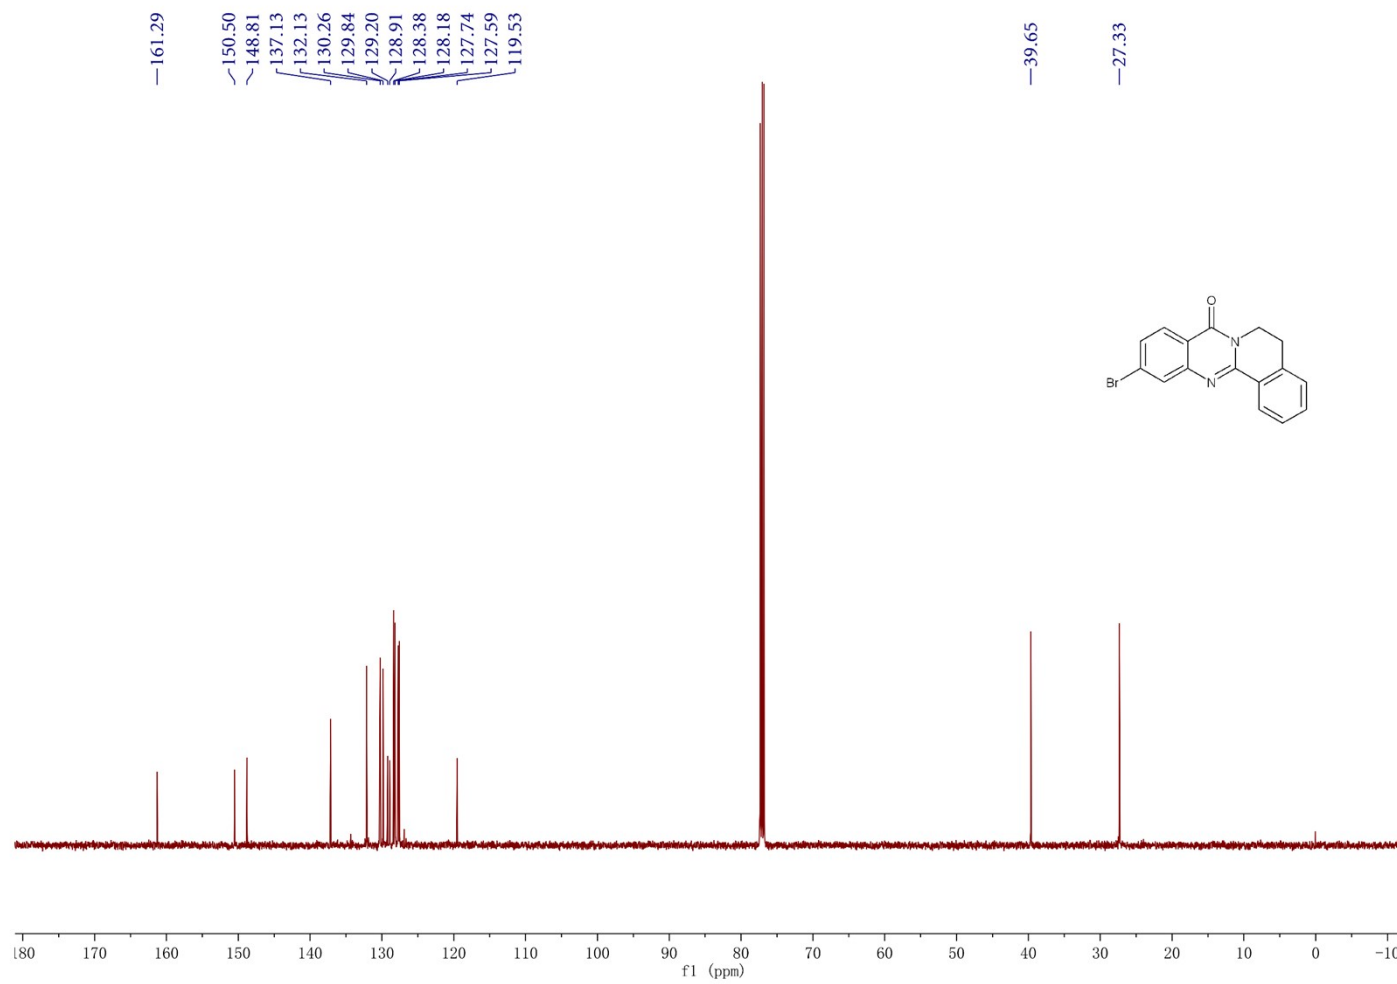

$^1\text{H}$  NMR ( $\text{CDCl}_3$ , 500 MHz) spectra of **4m**

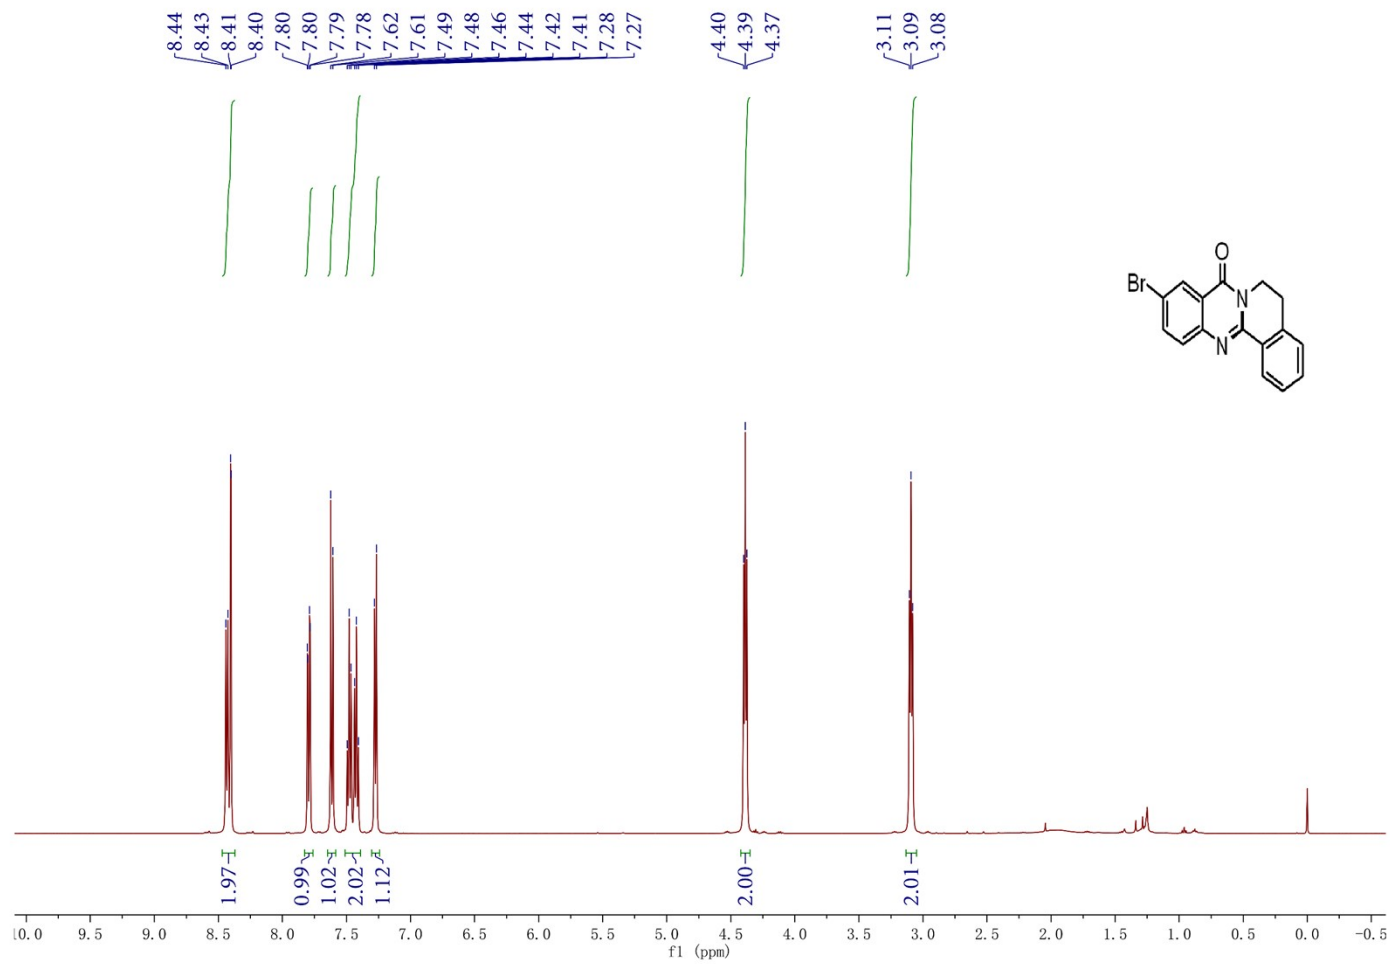



$^{13}\text{C}$  NMR ( $\text{CDCl}_3$ , 126 MHz) spectra of **4m**

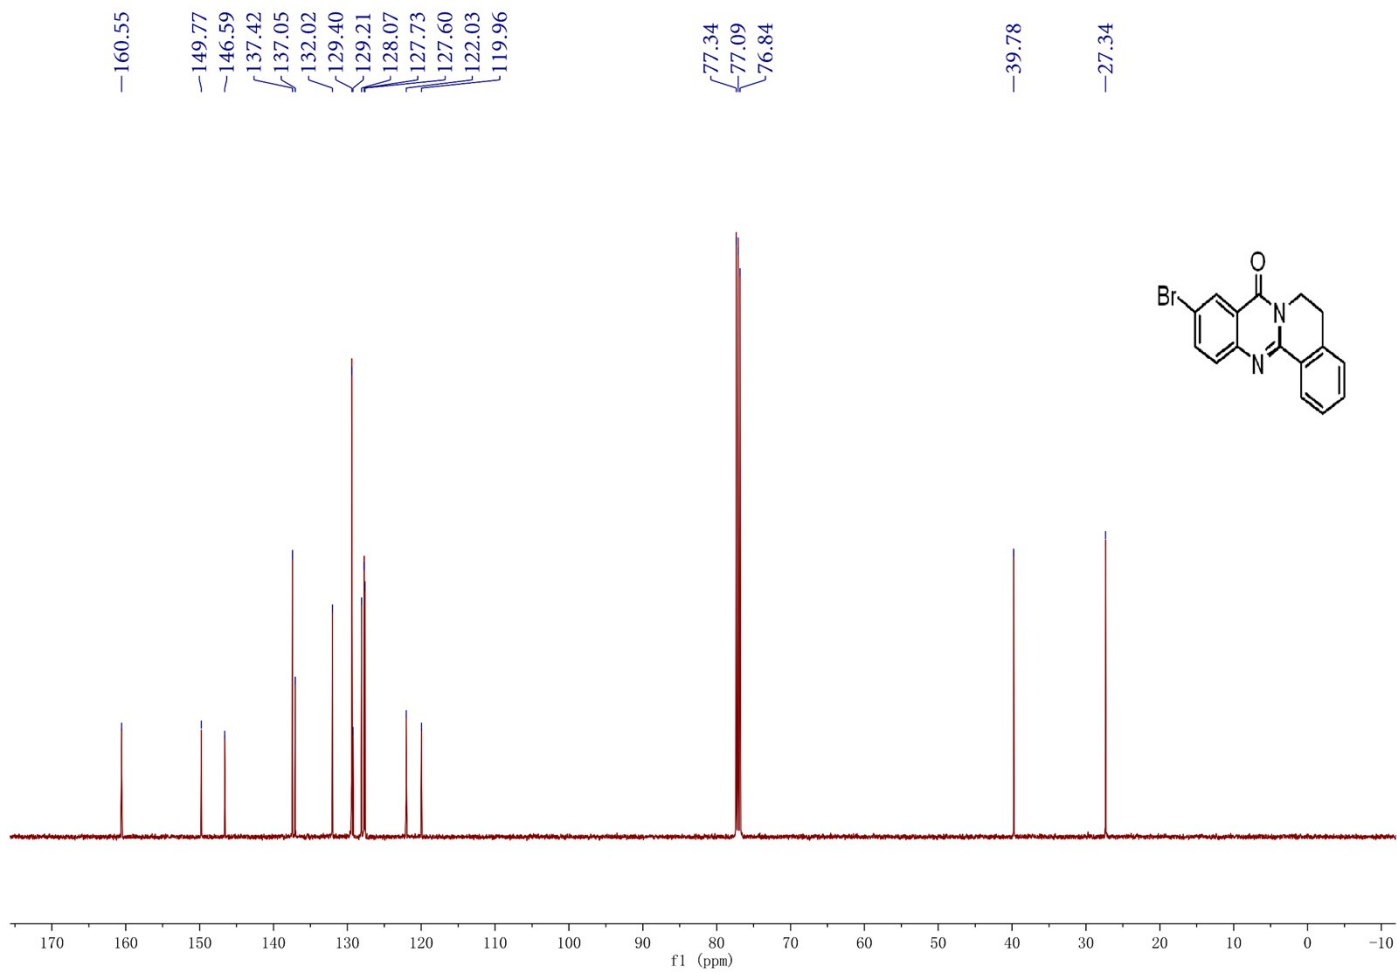

$^1\text{H}$  NMR ( $\text{CDCl}_3$ , 500 MHz) spectra of **4n**

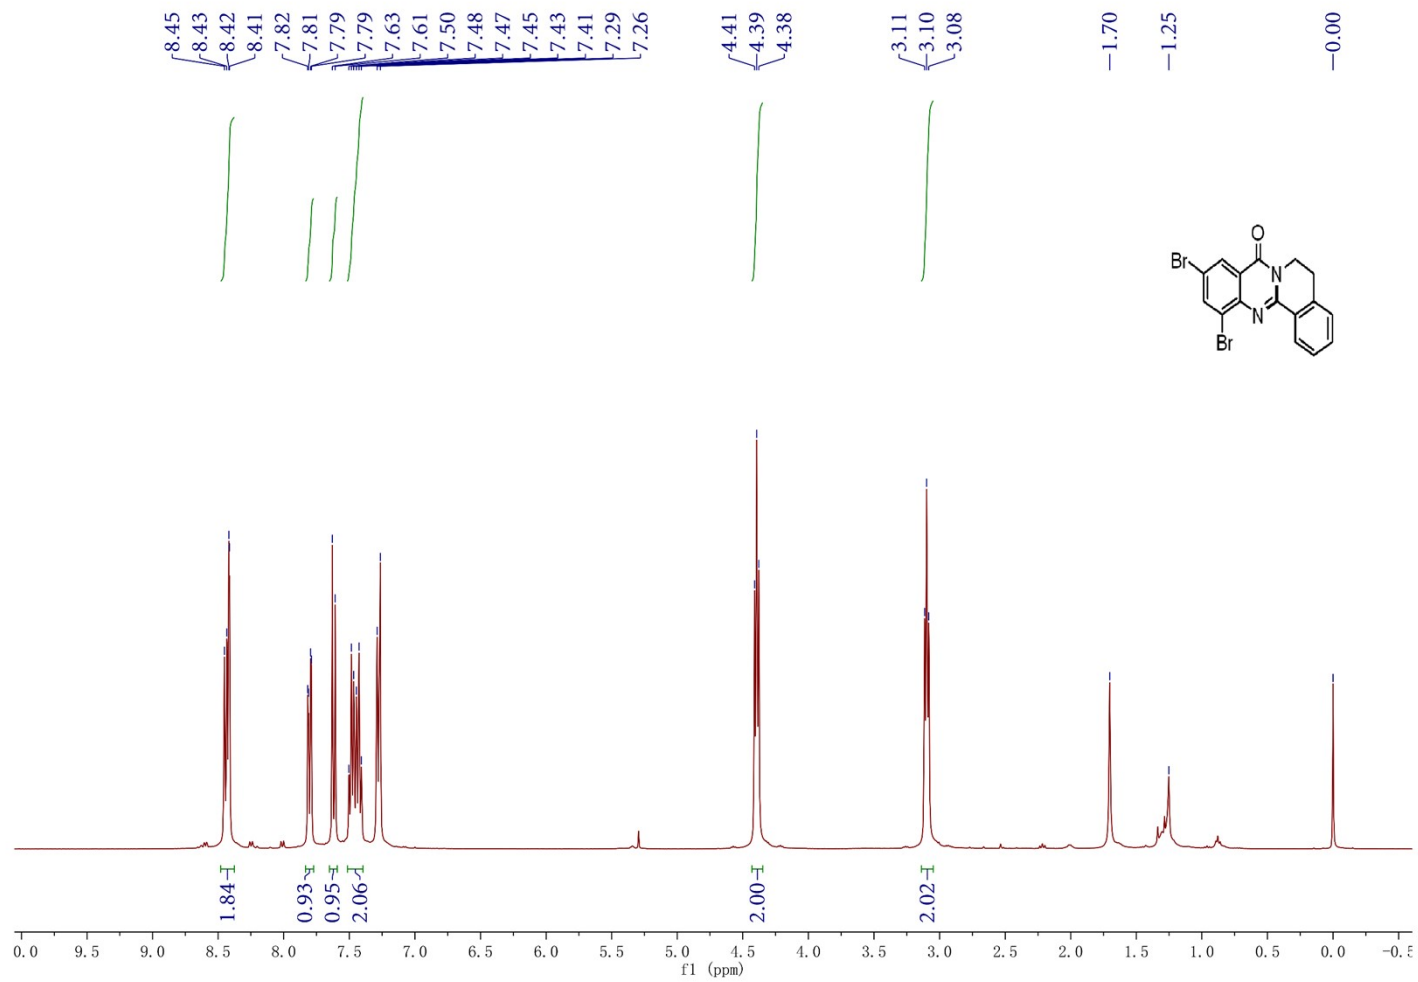

$^{13}\text{C}$  NMR ( $\text{CDCl}_3$ , 126 MHz) spectra of **4n**

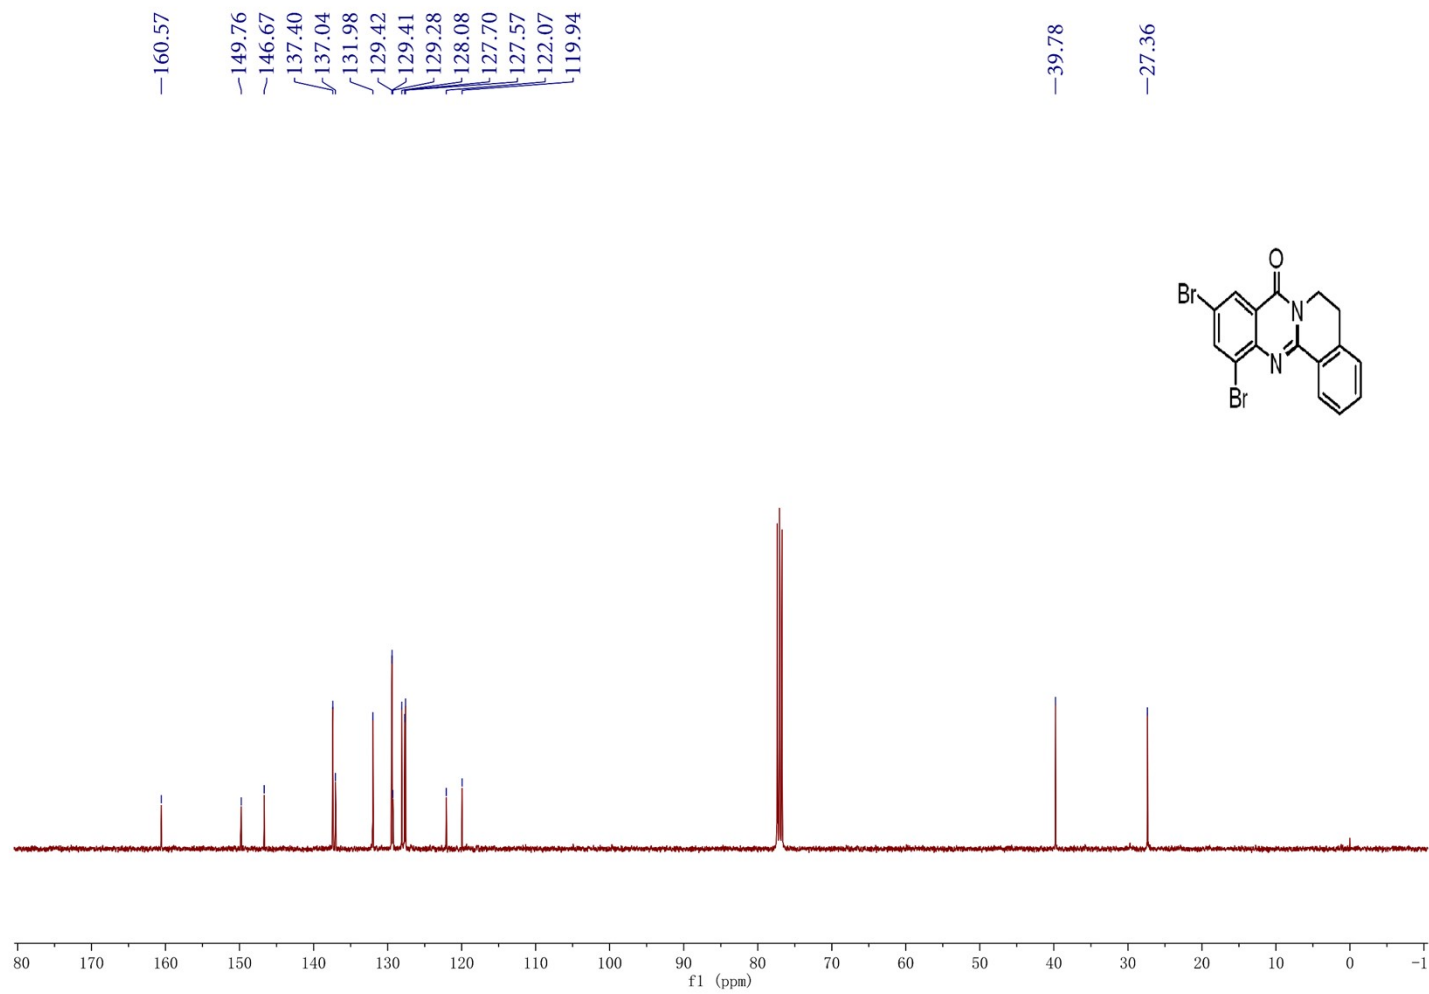

$^1\text{H}$  NMR ( $\text{CDCl}_3$ , 500 MHz) spectra of **4a** (from 2-aminophenone)

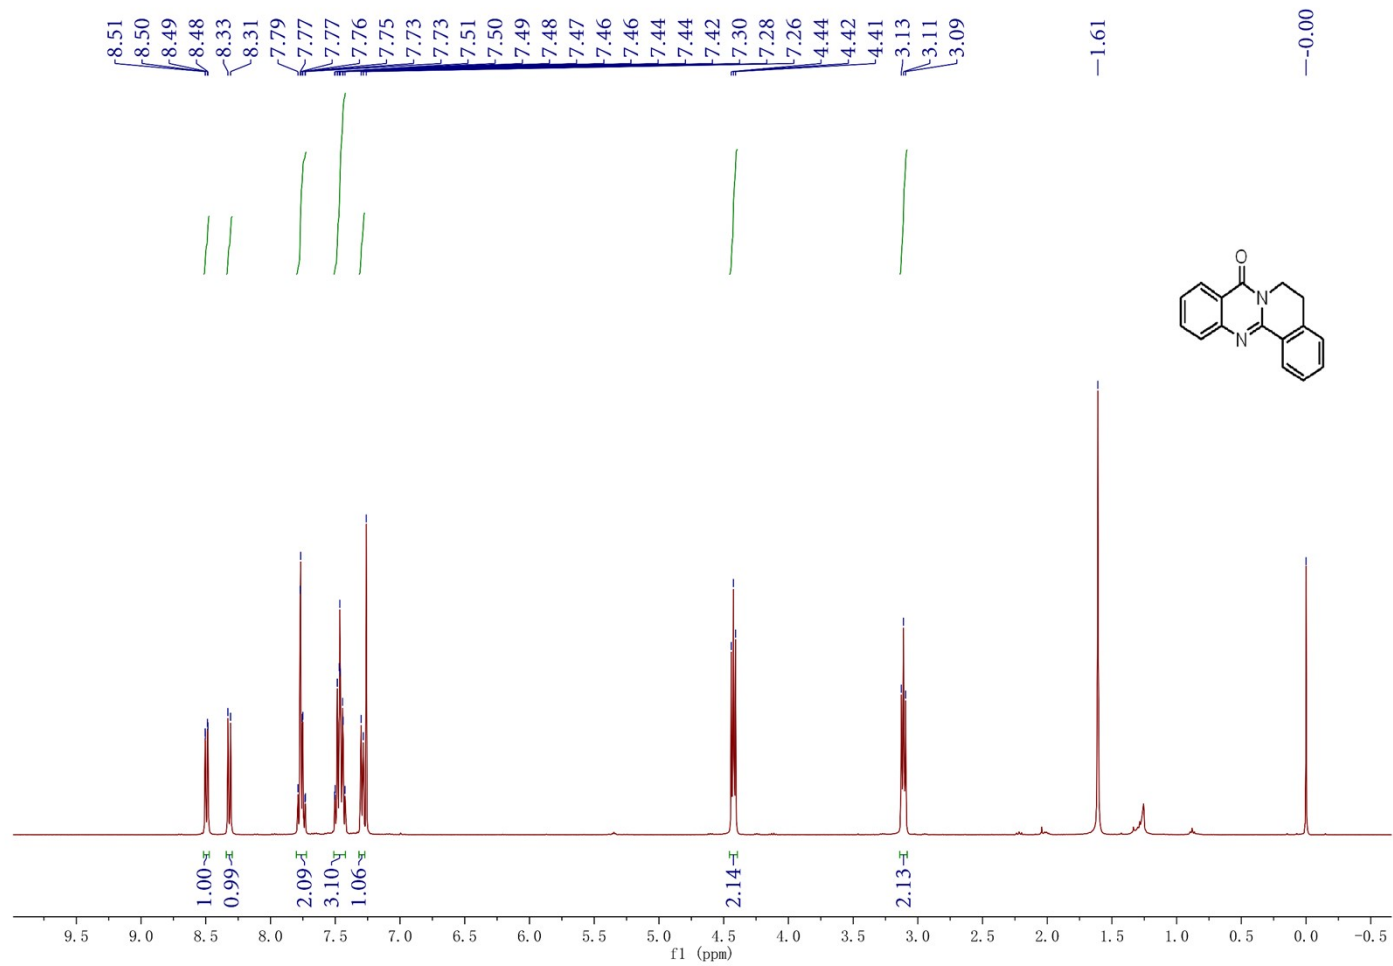

$^{13}\text{C}$  NMR ( $\text{CDCl}_3$ , 126 MHz) spectra of **4a**(from 2-aminophenone)

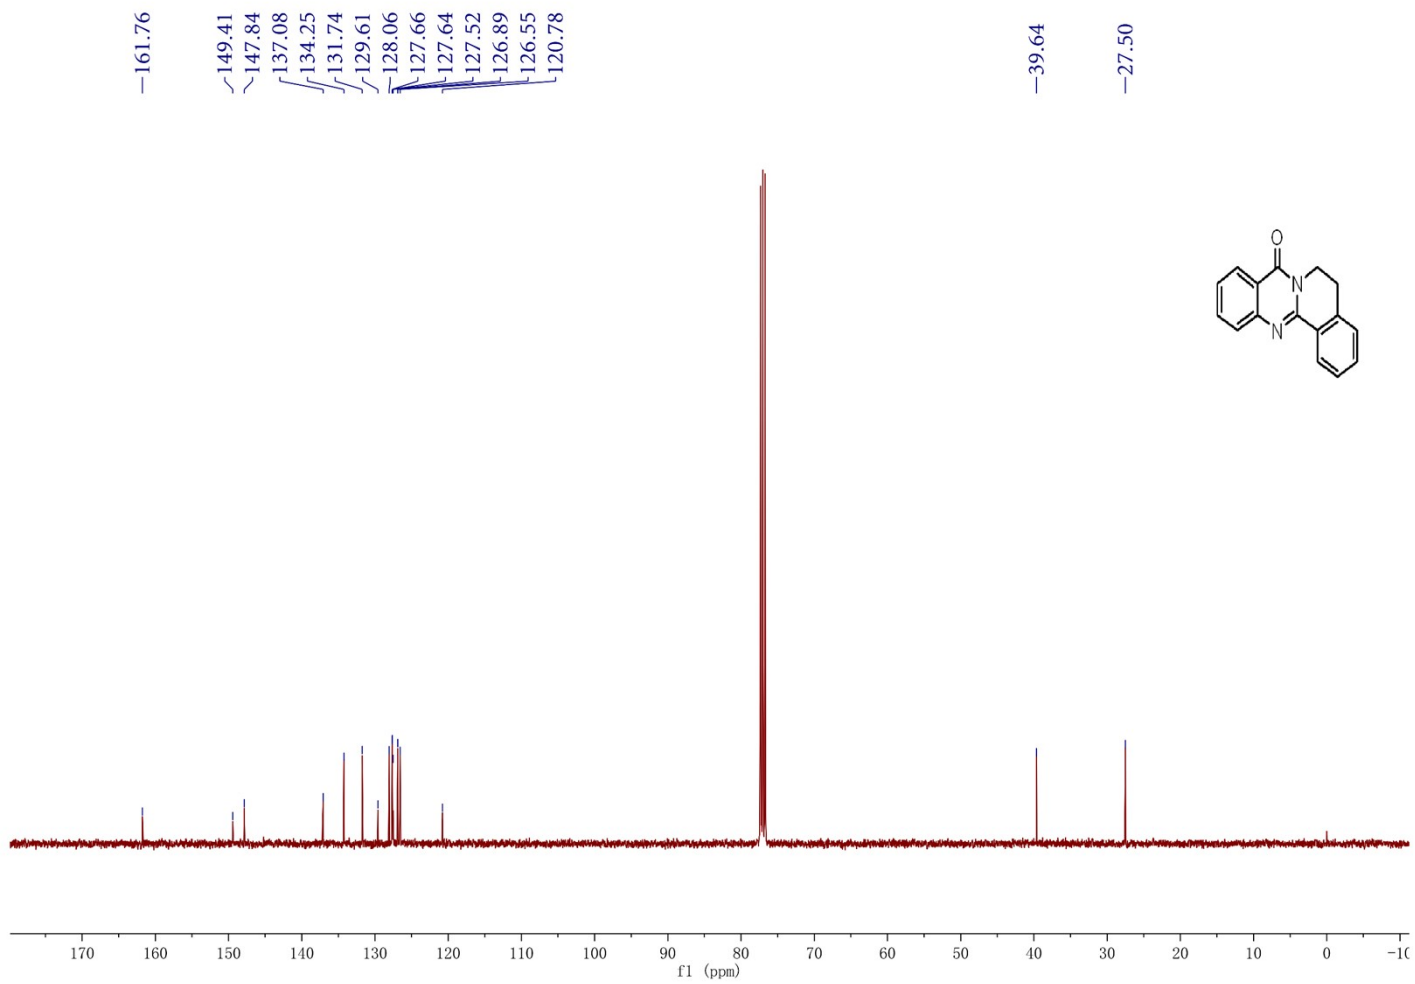

$^1\text{H}$  NMR ( $\text{CDCl}_3$ , 500 MHz) spectra of **4o**

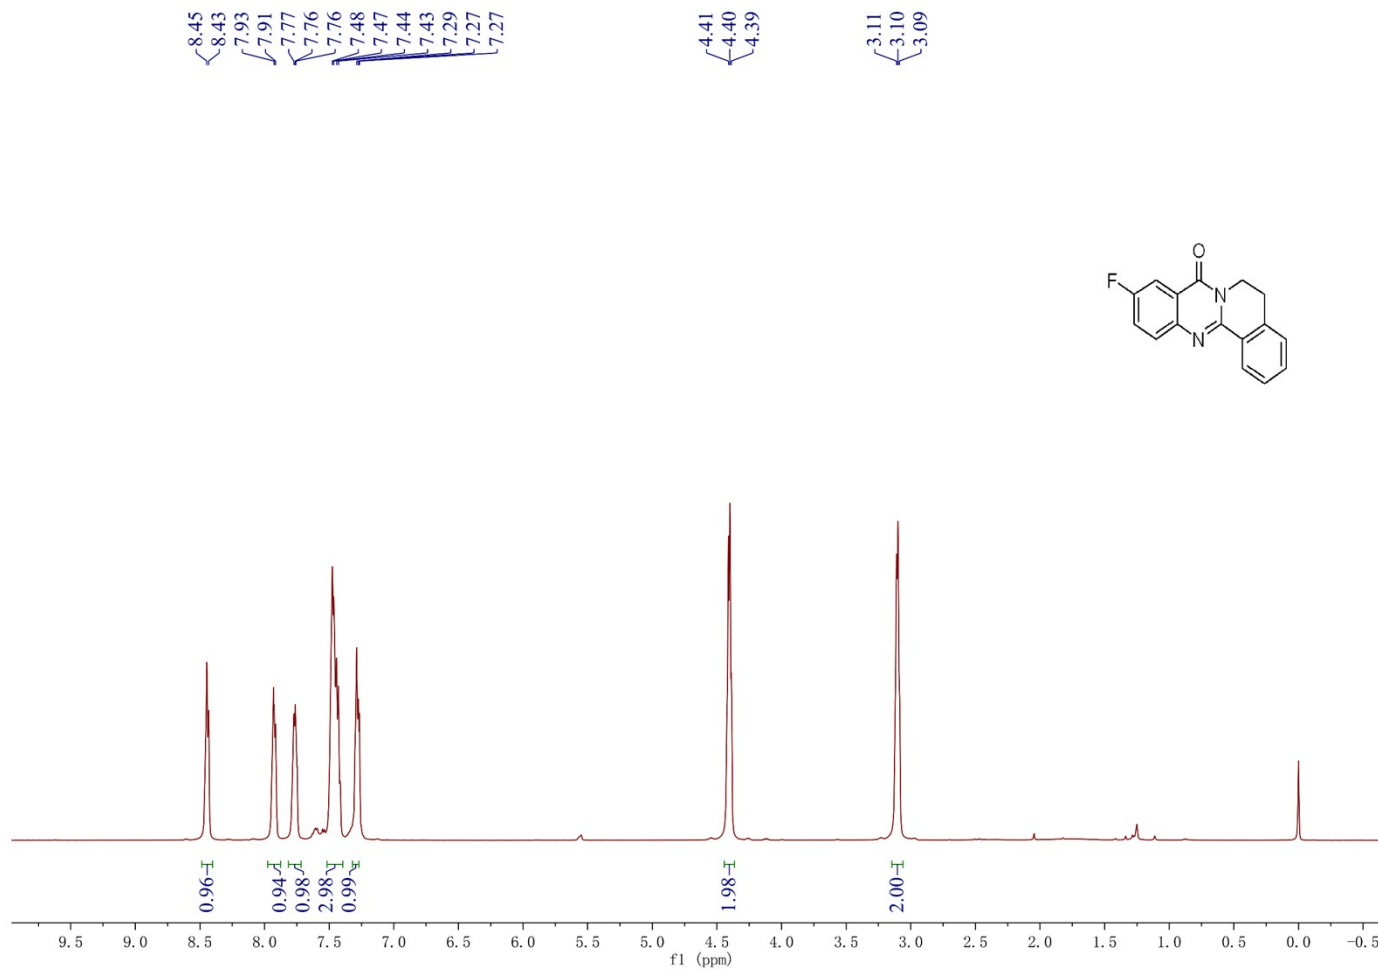

$^{13}\text{C}$  NMR ( $\text{CDCl}_3$ , 126 MHz) spectra of **4o**

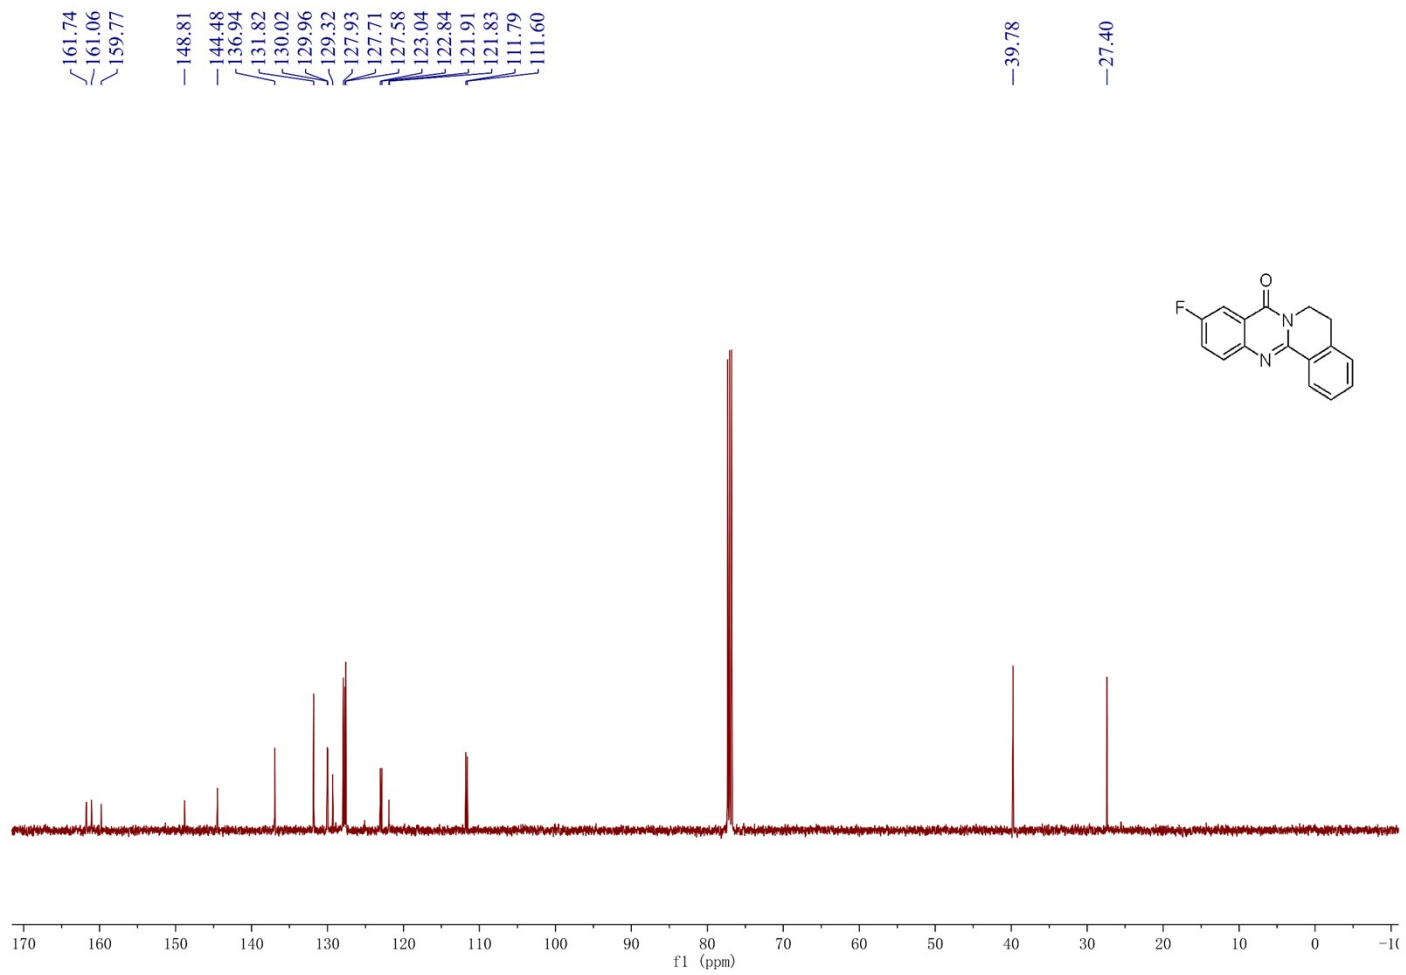

$^1\text{H}$  NMR ( $\text{CDCl}_3$ , 500 MHz) spectra of **4p**

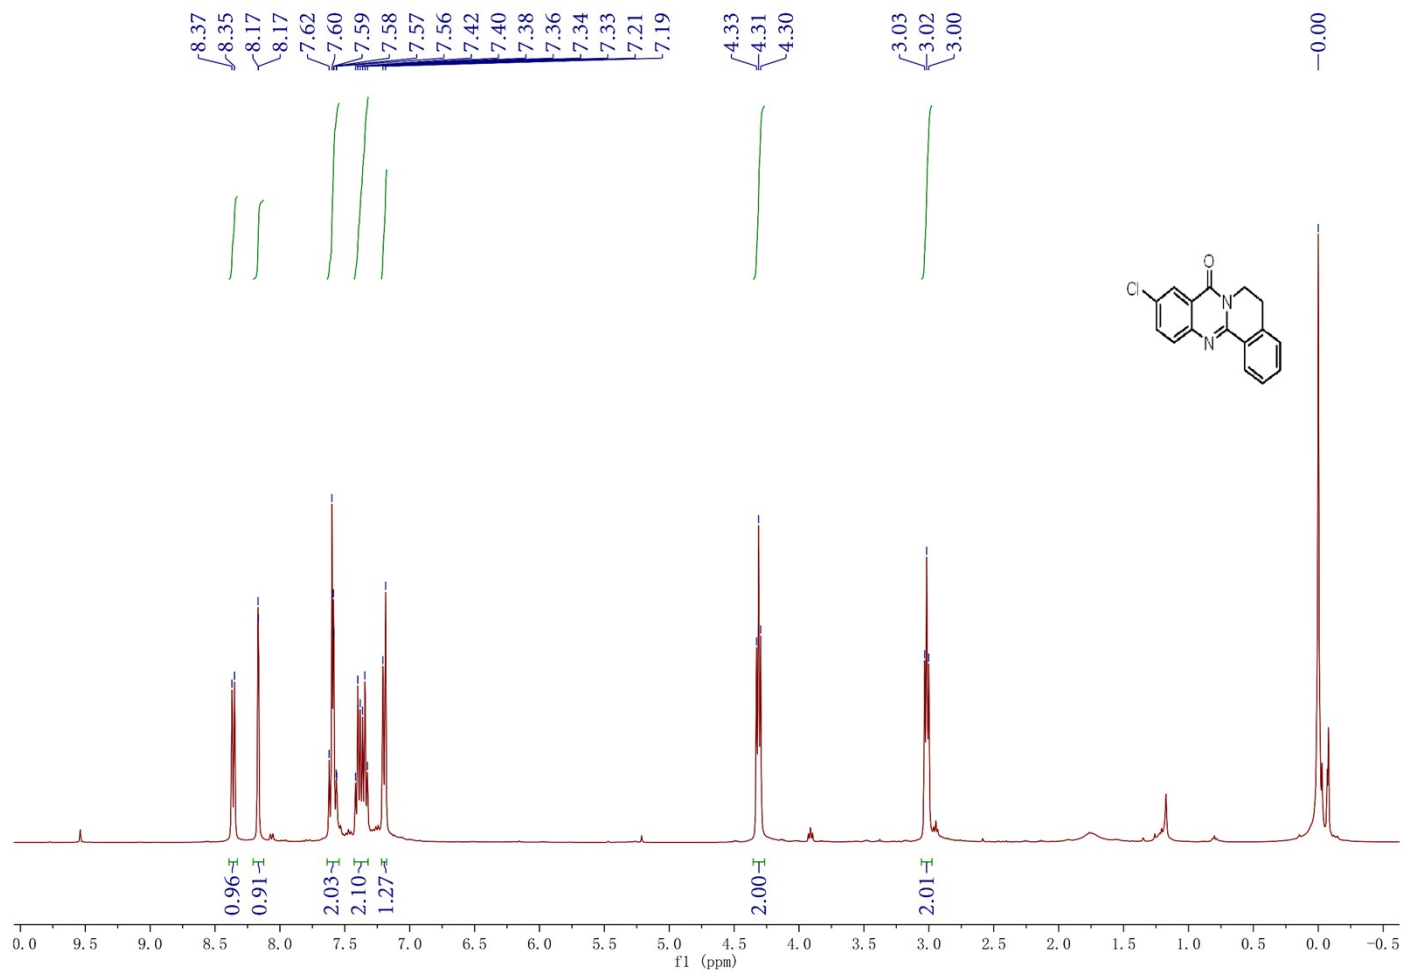



$^{13}\text{C}$  NMR ( $\text{CDCl}_3$ , 126 MHz) spectra of **4p**

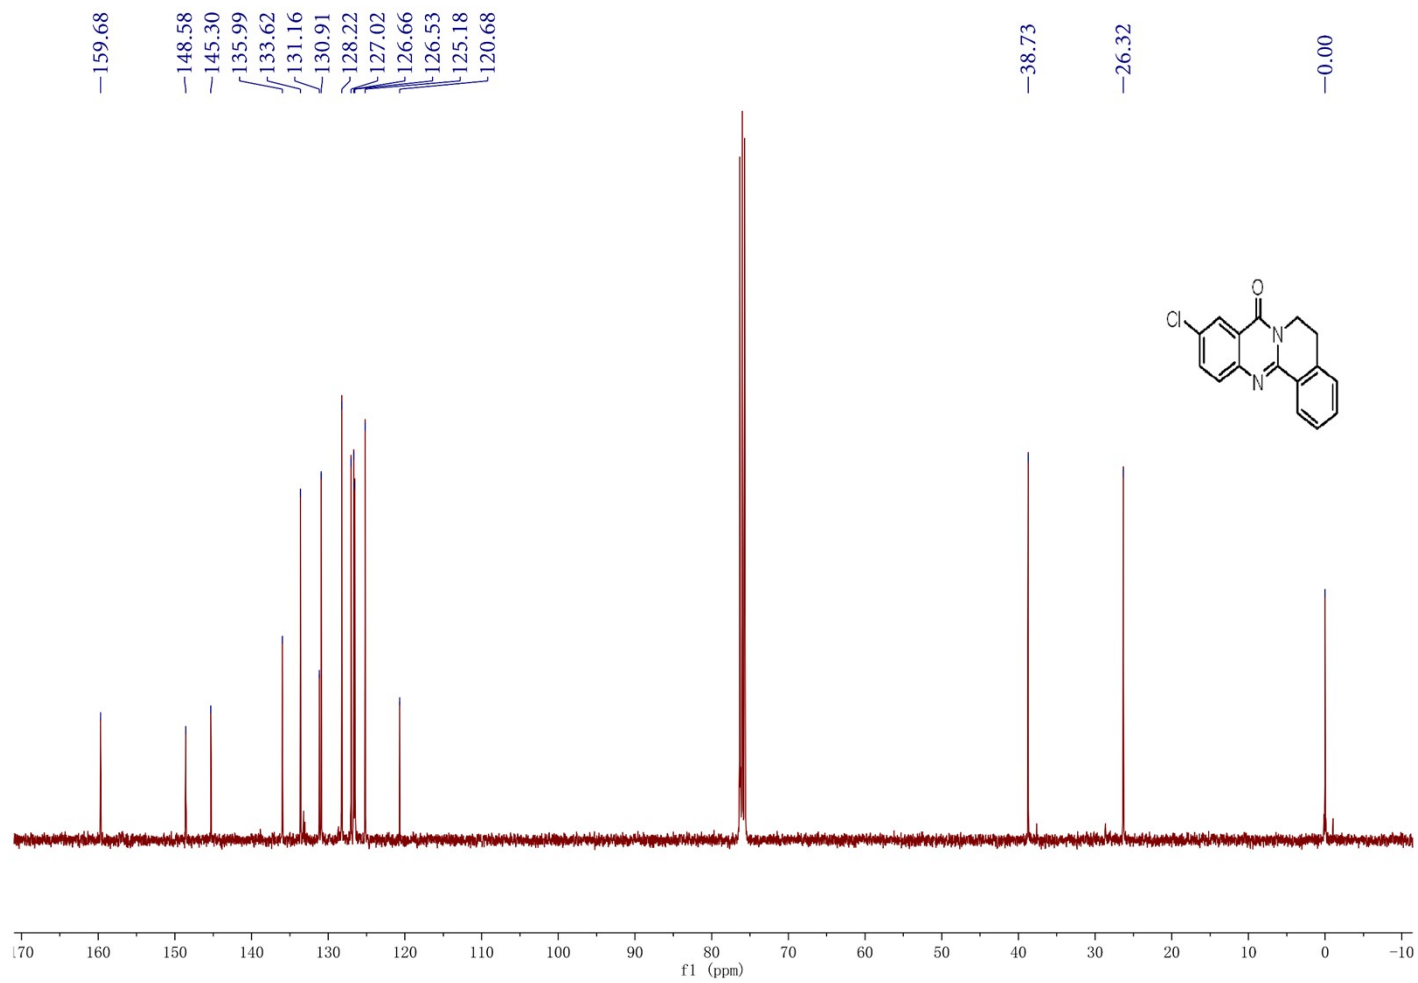

$^1\text{H}$  NMR ( $\text{CDCl}_3$ , 500 MHz) spectra of **4m**(from 2-aminophenone)

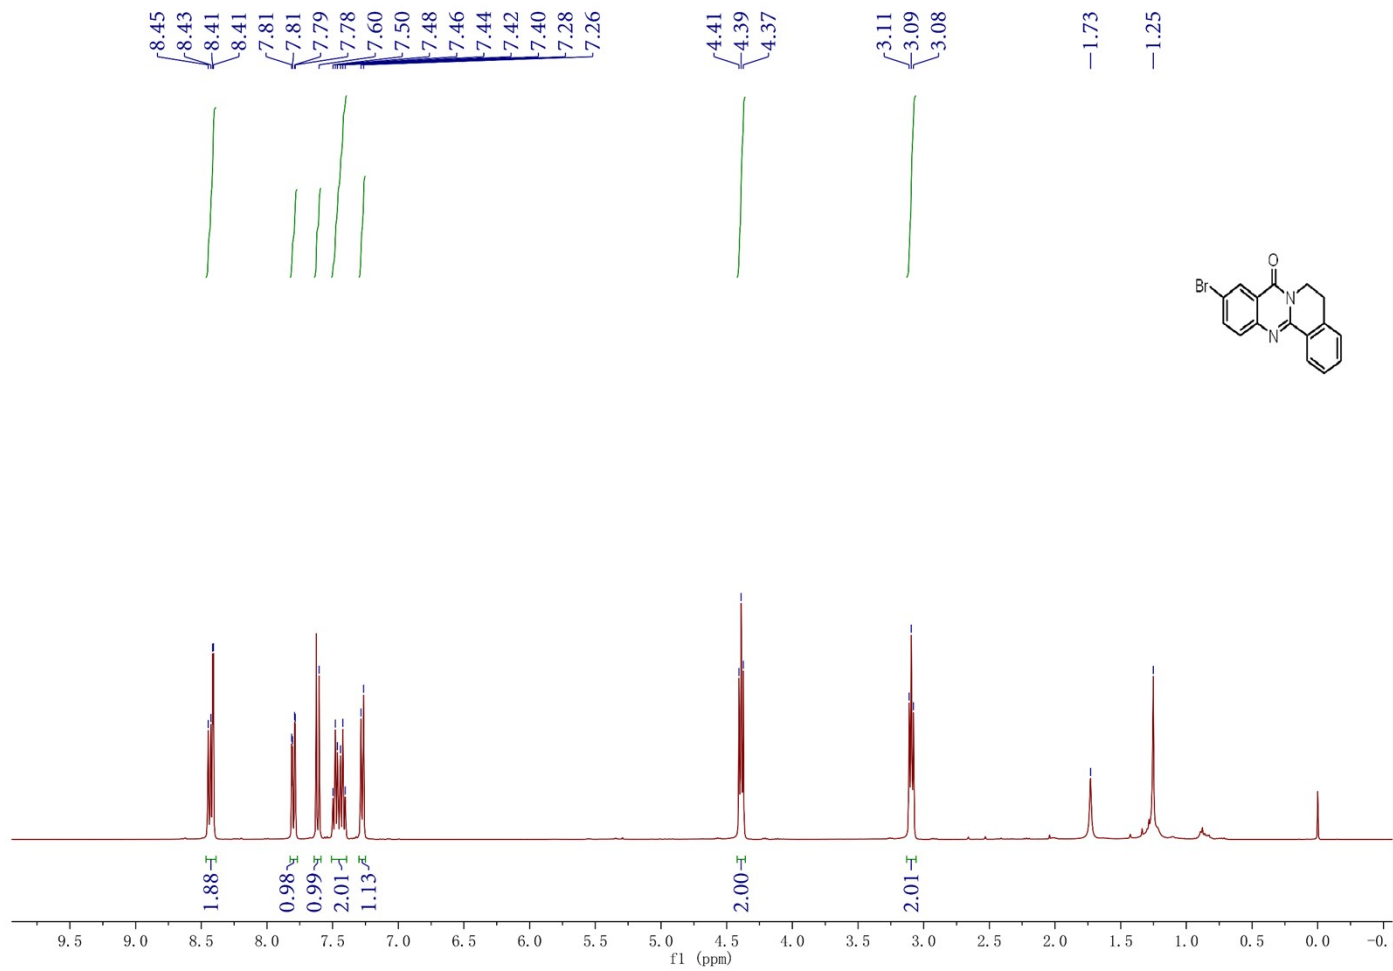

$^{13}\text{C}$  NMR ( $\text{CDCl}_3$ , 126 MHz) spectra of **4m**(from 2-aminophenone)

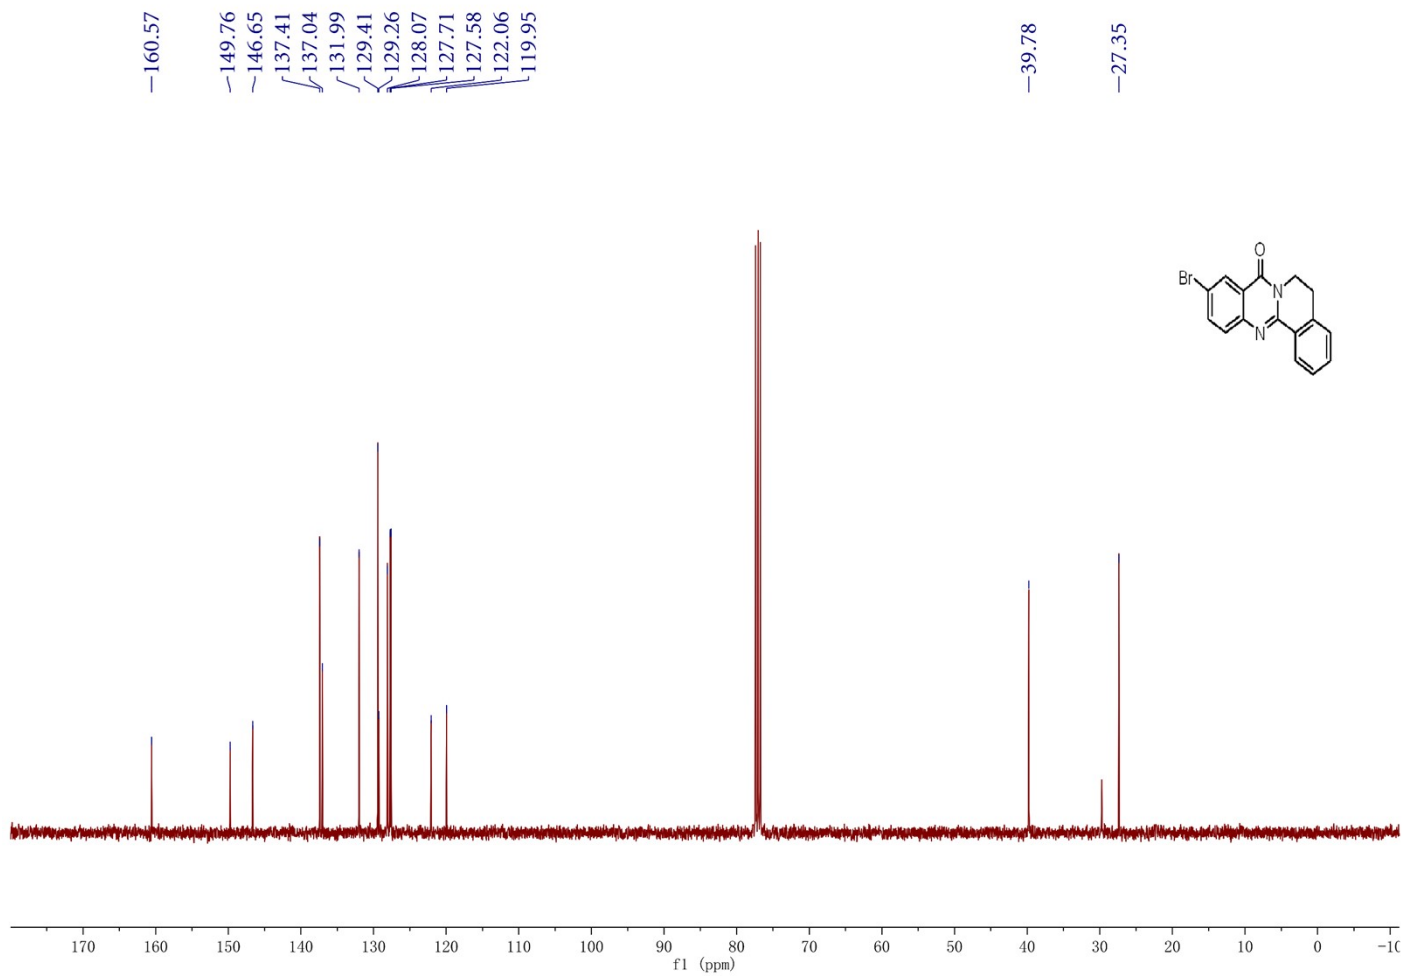

$^1\text{H}$  NMR ( $\text{CDCl}_3$ , 500 MHz) spectra of **4I**(from 2-aminophenone)

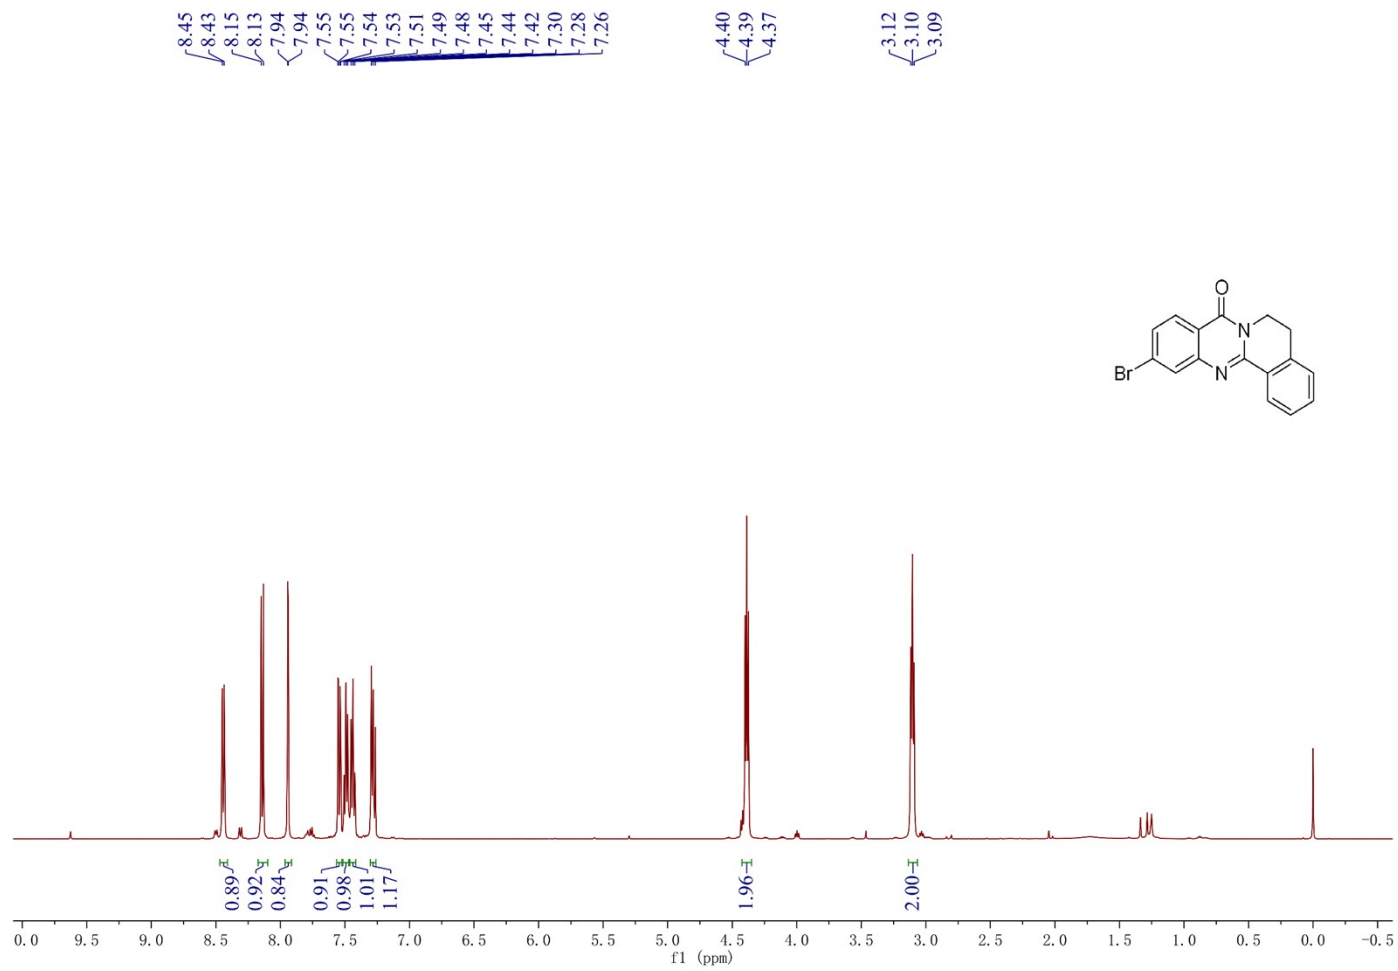

$^{13}\text{C}$  NMR ( $\text{CDCl}_3$ , 126 MHz) spectra of **4l**(from 2-aminophenone)

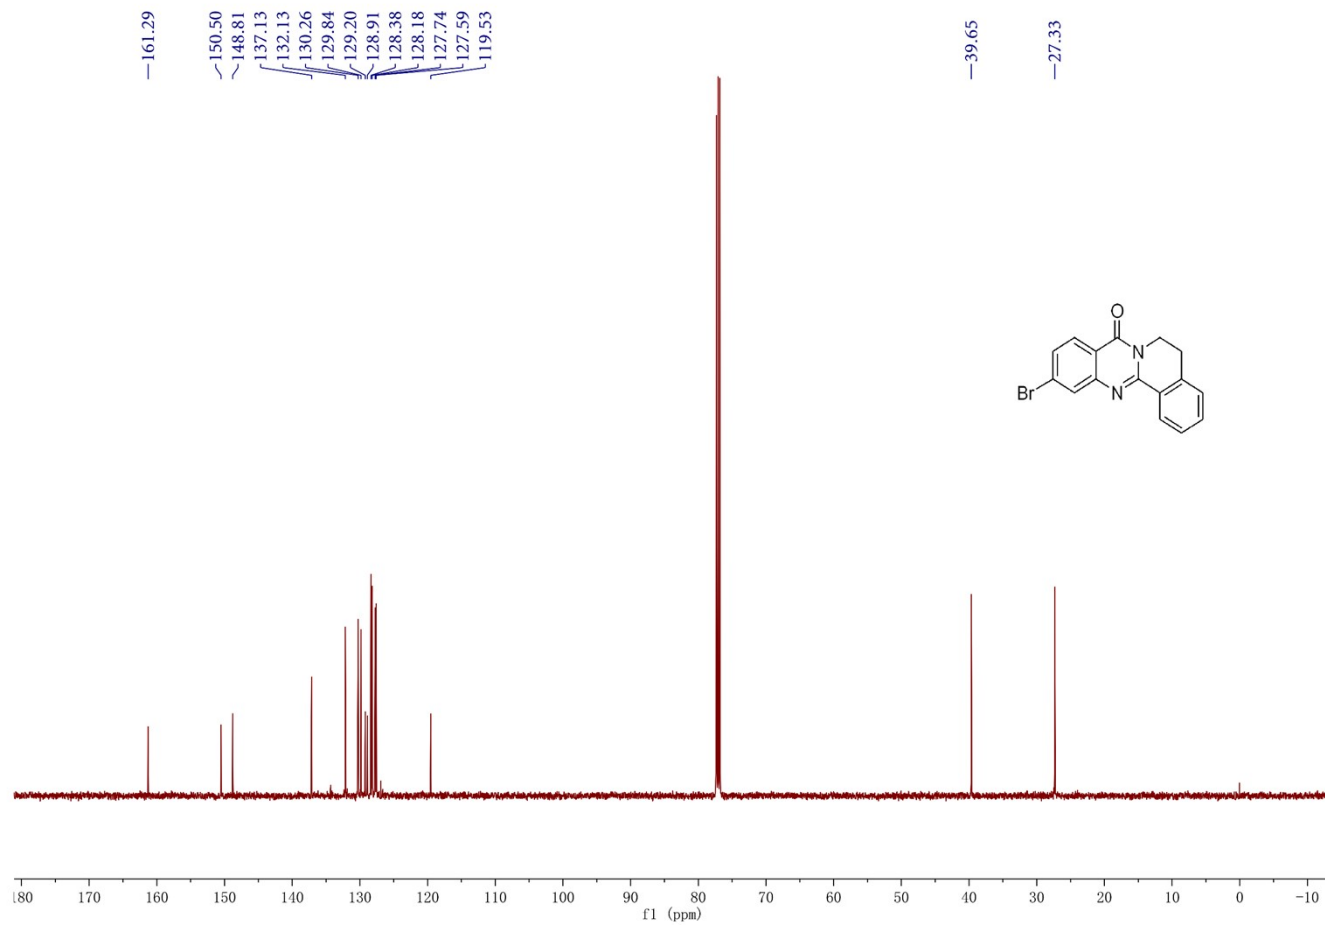

$^1\text{H}$  NMR ( $\text{CDCl}_3$ , 500 MHz) spectra of **4q**

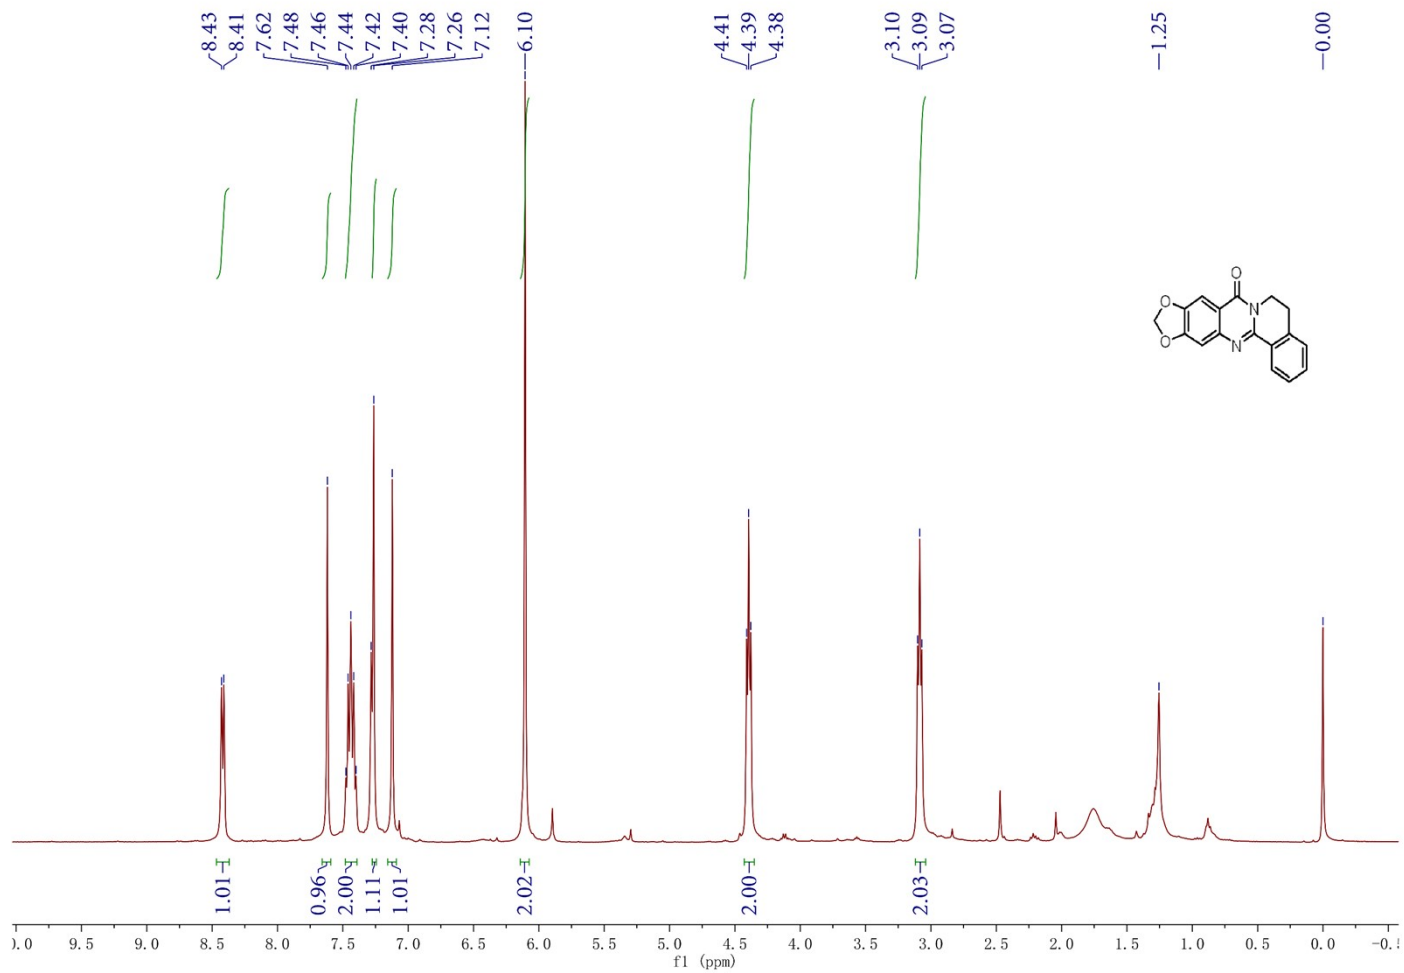

$^{13}\text{C}$  NMR ( $\text{CDCl}_3$ , 126 MHz) spectra of **4q**

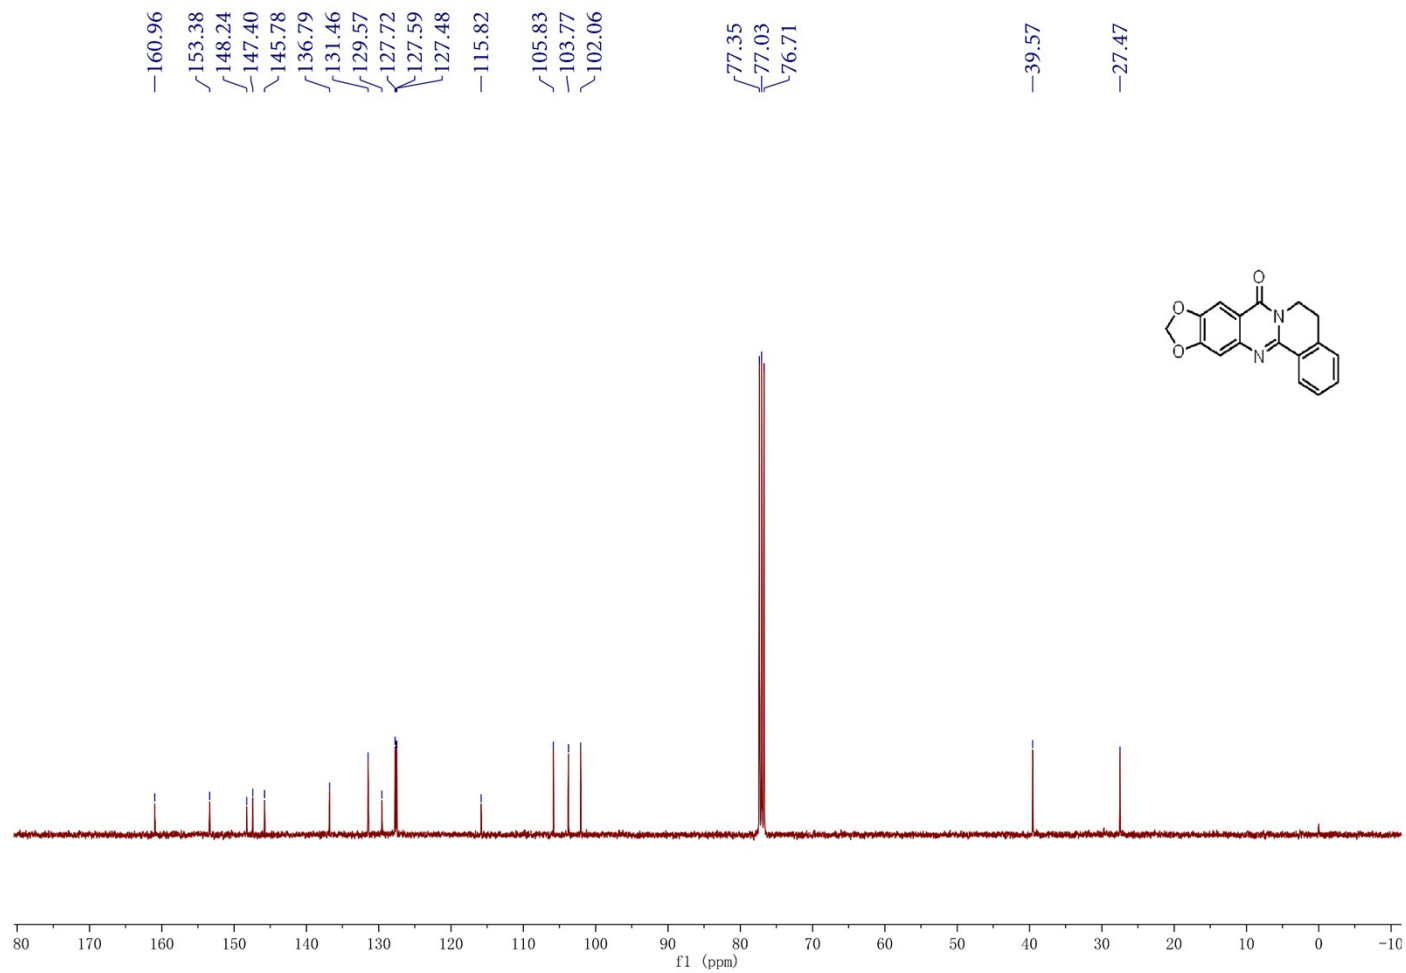

$^1\text{H}$  NMR ( $\text{CDCl}_3$ , 500 MHz) spectra of **5a**

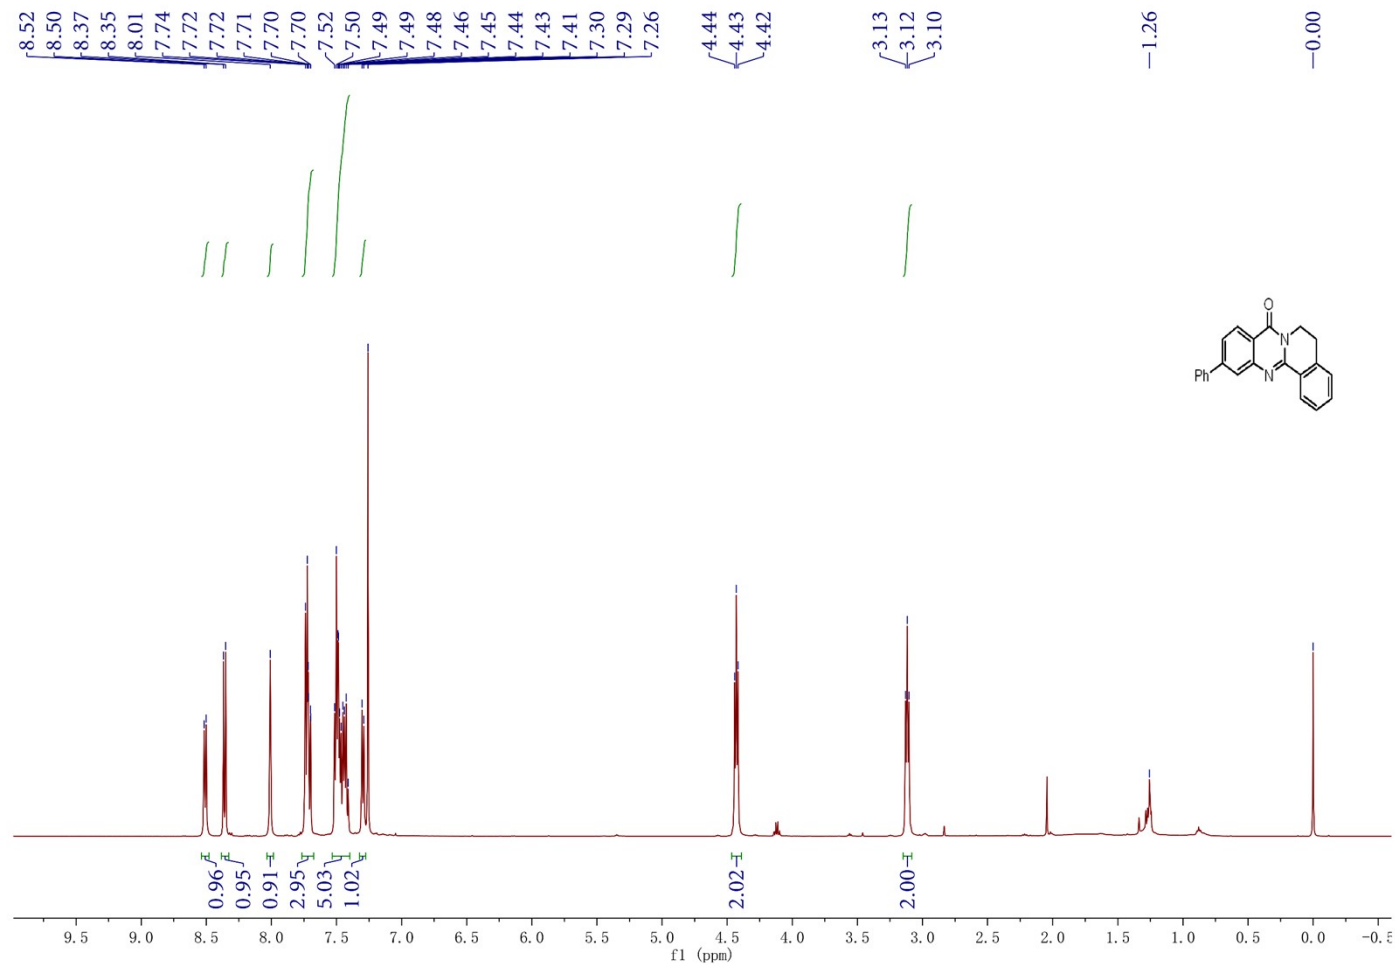



$^{13}\text{C}$  NMR ( $\text{CDCl}_3$ , 126 MHz) spectra of **5a**

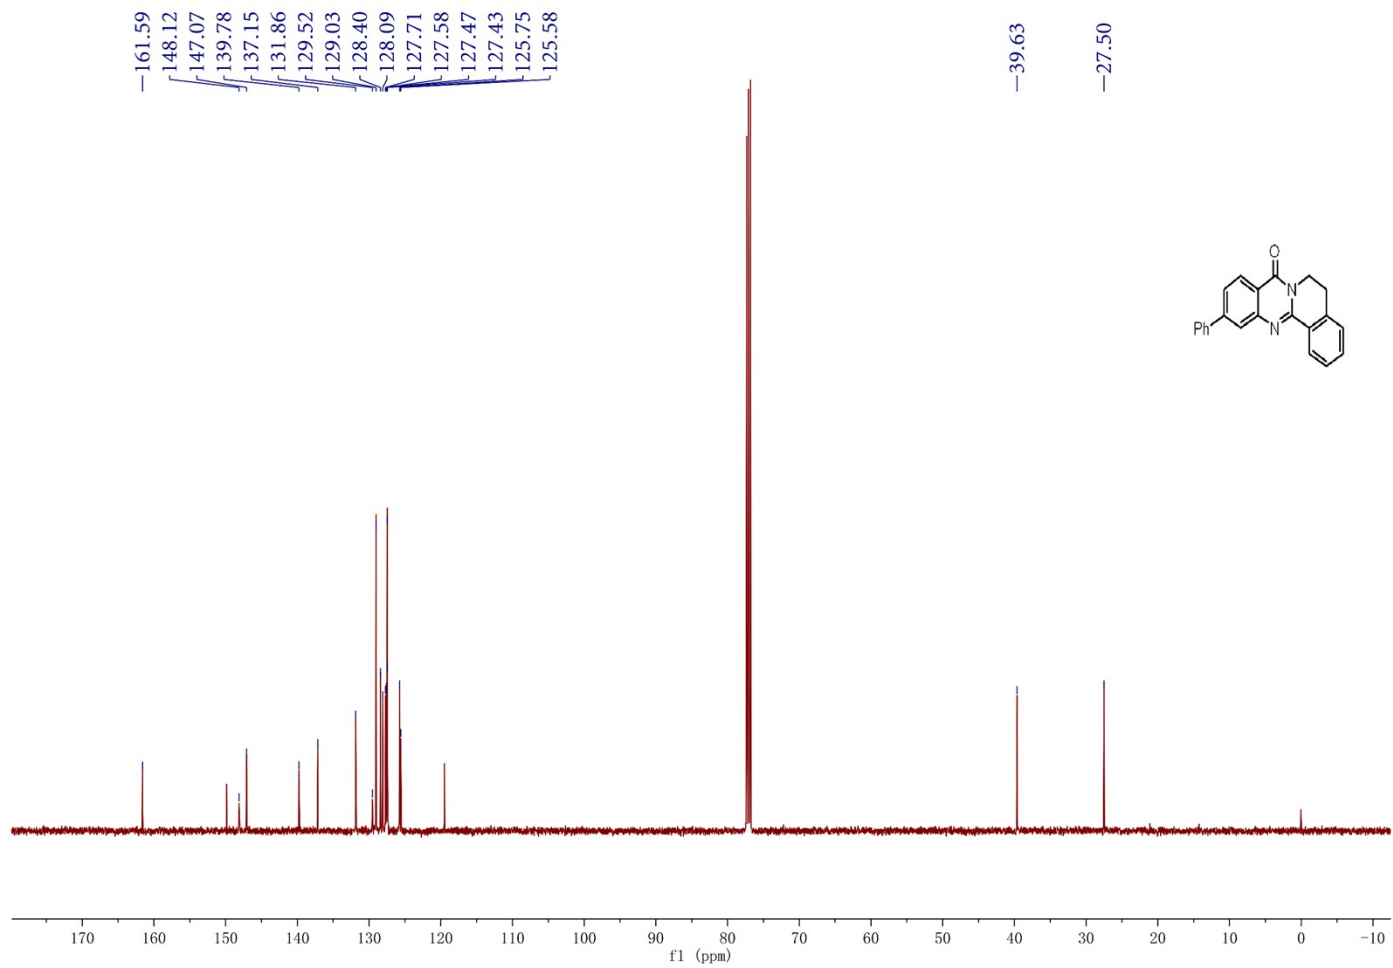

$^1\text{H}$  NMR ( $\text{CDCl}_3$ , 500 MHz) and spectra of **5b**

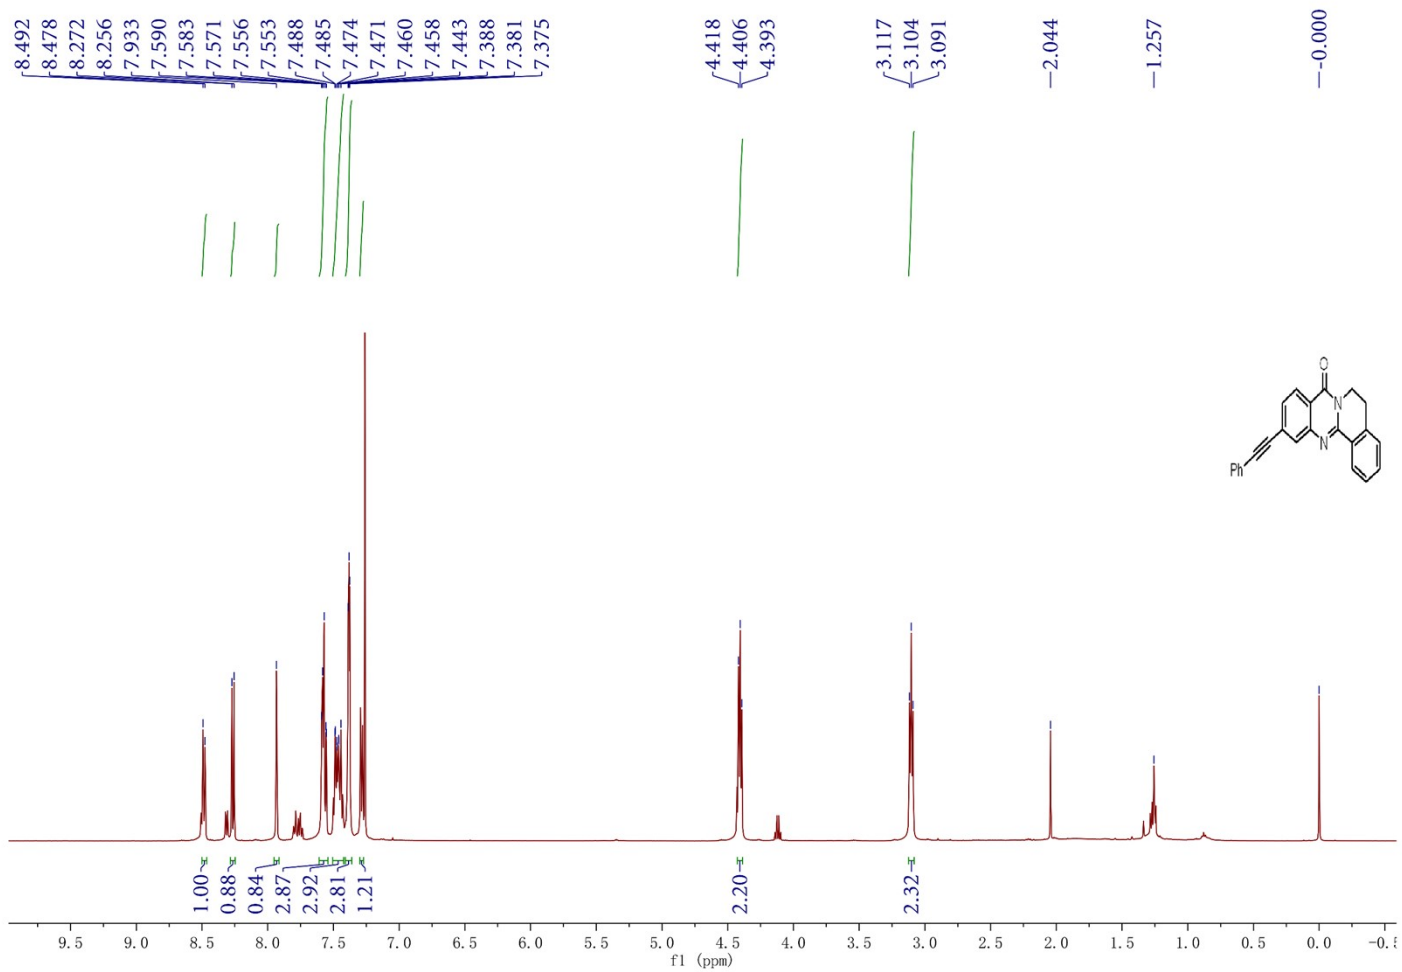

$^{13}\text{C}$  NMR ( $\text{CDCl}_3$ , 126 MHz) spectra of **5b**

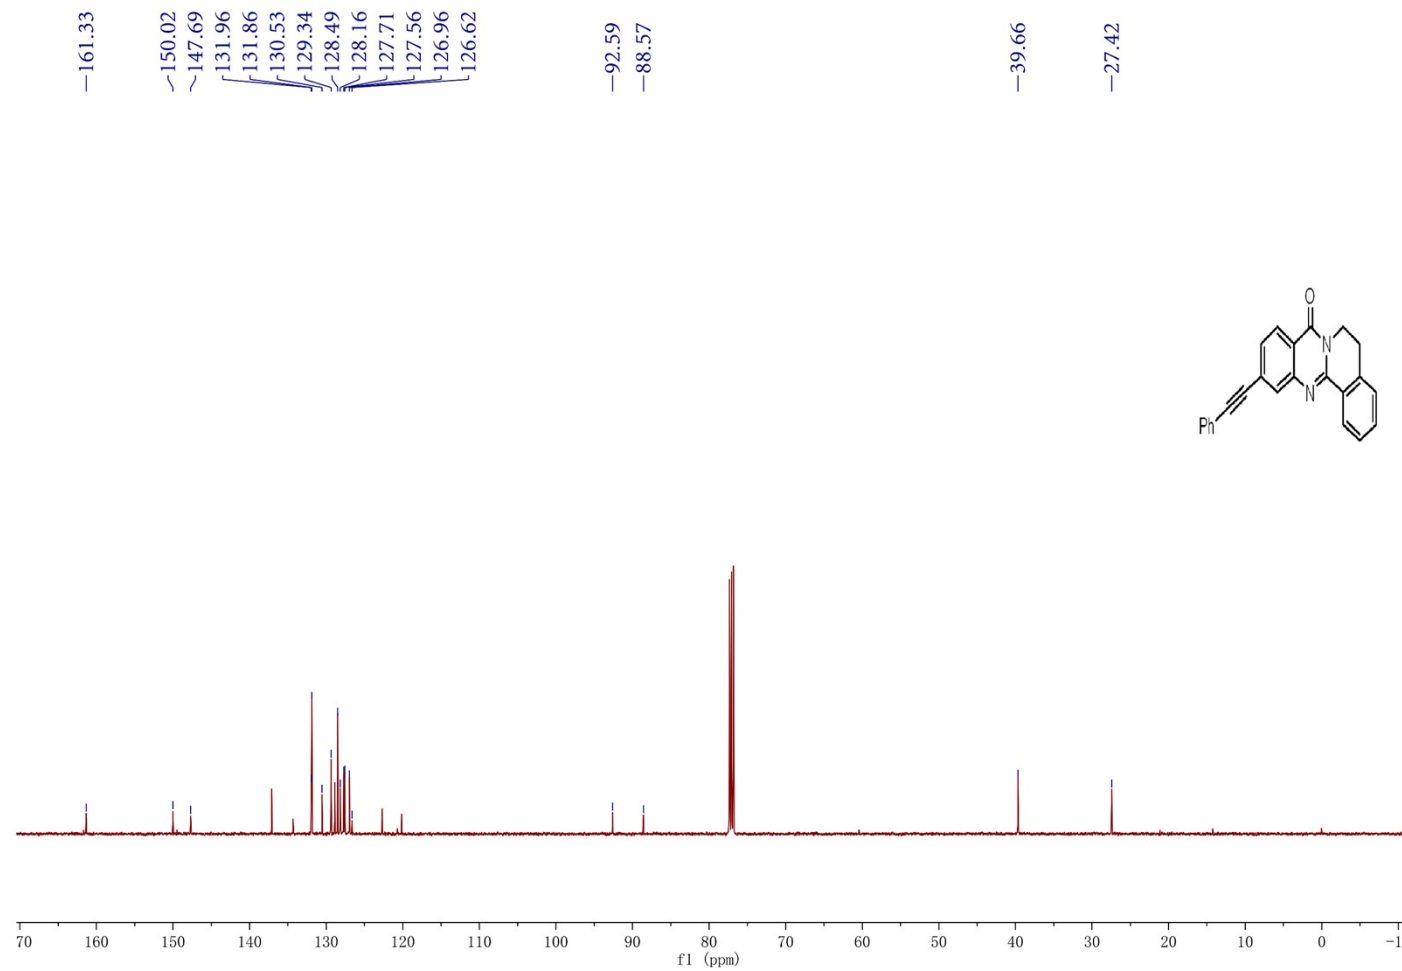

$^1\text{H}$  NMR ( $\text{CDCl}_3$ , 500 MHz) and  $^{13}\text{C}$  NMR ( $\text{CDCl}_3$ , 126 MHz) spectra of **6**

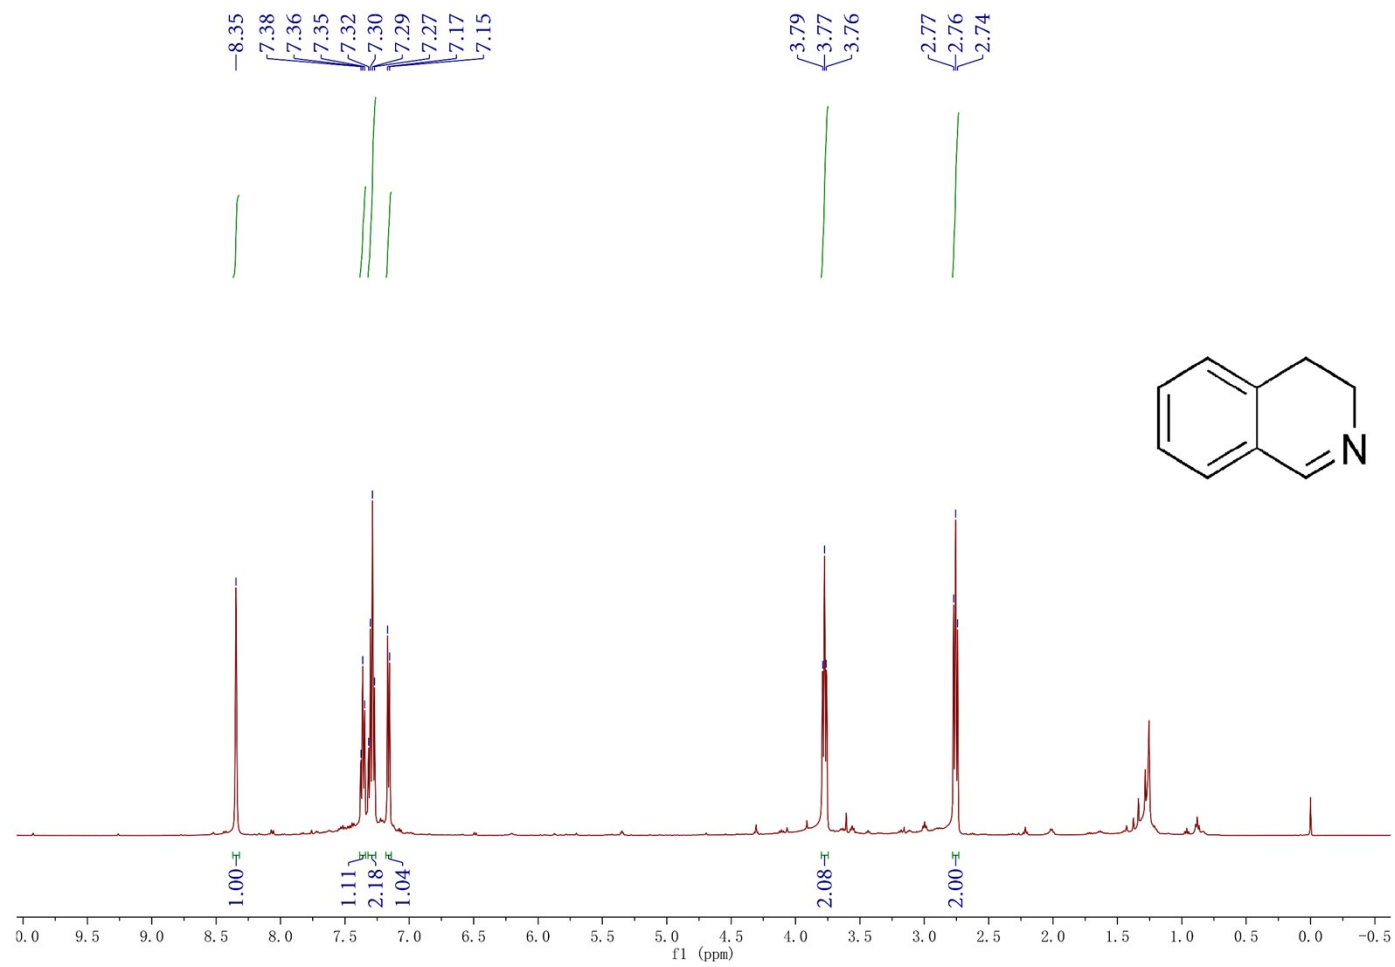

$^{13}\text{C}$  NMR ( $\text{CDCl}_3$ , 126 MHz) spectra of **6**

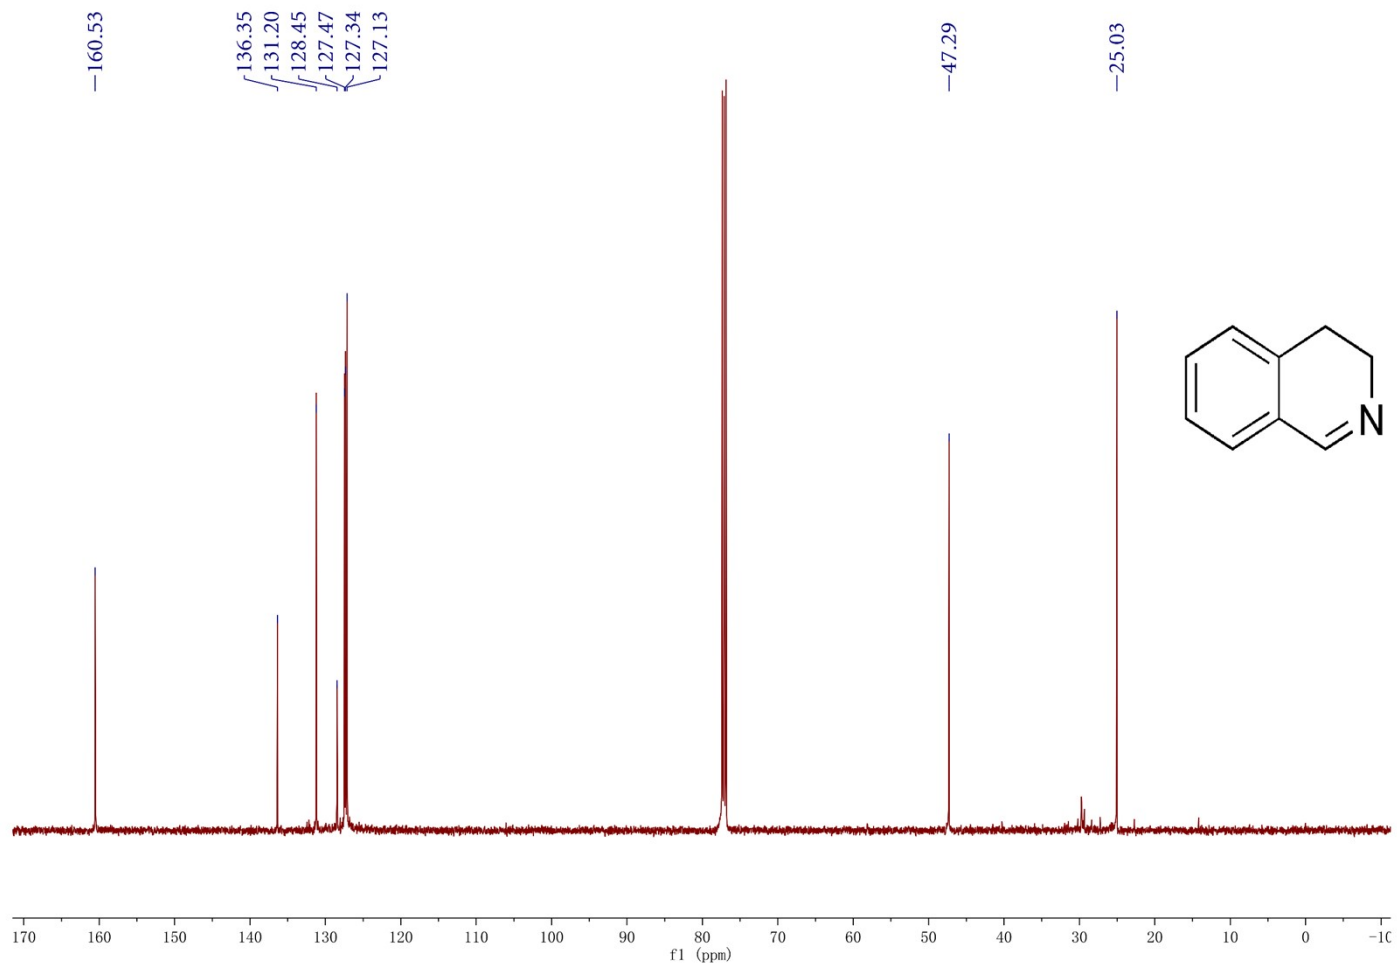

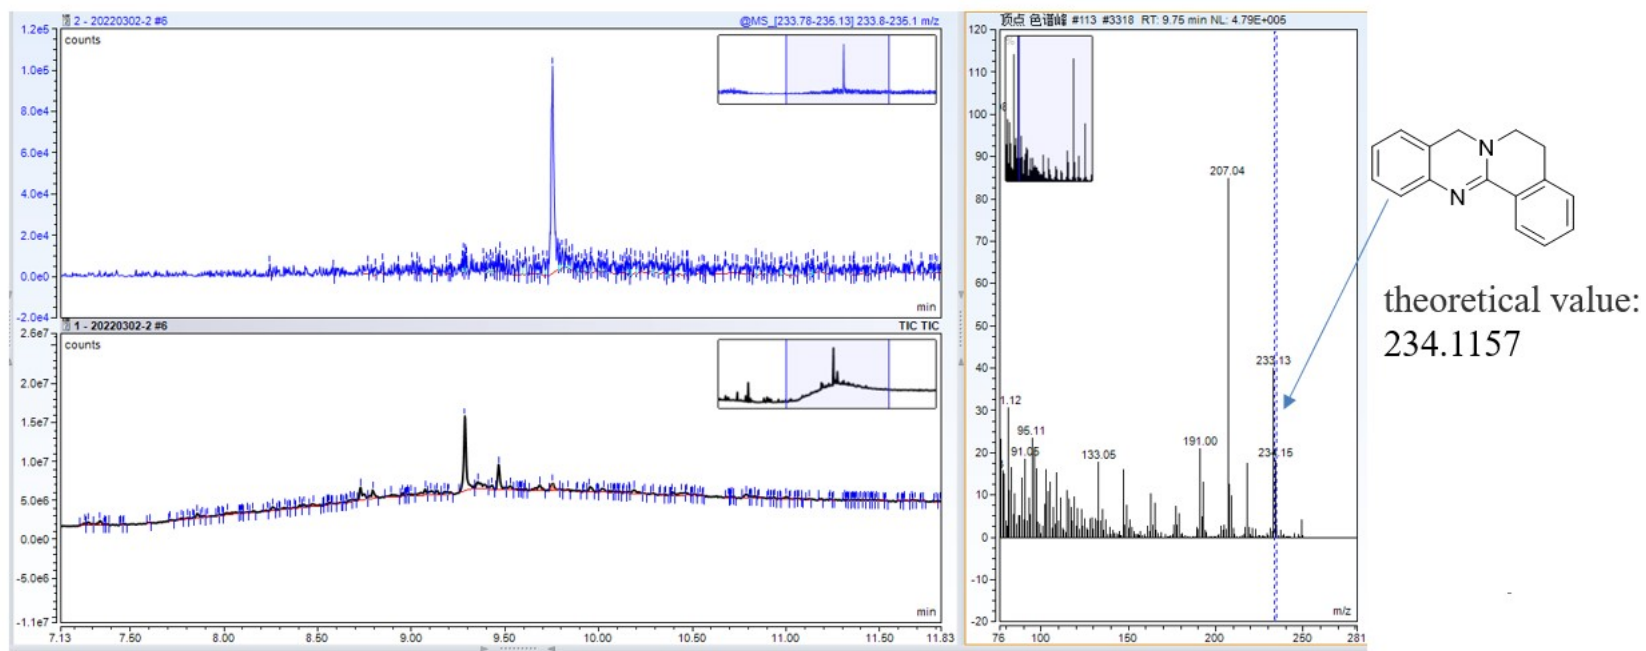

Figure 1 J GC-MS detection

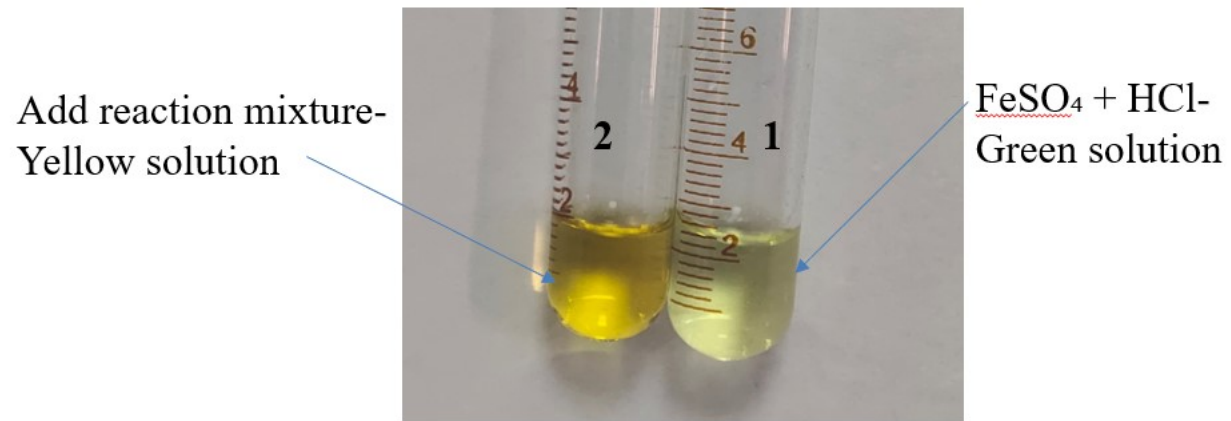

Figure 2 Detection of  $\text{H}_2\text{O}_2$
